# Supplementary material for: Efficient access to chiral dihydrobenzoxazinones via Rh-catalyzed hydrogenation
Source: Royal Society of Chemistry journal article supplement (doi:10.1039/c9ra02694k), 2019-01-01
Supplement: c9ra02694k1.pdf [file c9ra02694k1.pdf]

*Supporting information*

Efficient Access to Chiral Dihydrobenzoxazinones via Rh-Catalyzed  
Hydrogenation

Ziyi Chen,<sup>a</sup> Xuguang Yin,<sup>a</sup> Xiu-Qin Dong,<sup>\*a</sup> and Xumu Zhang<sup>a,b</sup>

<sup>a</sup> Key Laboratory of Biomedical Polymers, Engineering Research Centre of Organosilicon Compounds & Materials, Ministry of Education, College of Chemistry and Molecular Sciences, Wuhan University, Wuhan, Hubei, 430072, P. R. China.

<sup>b</sup> Department of Chemistry and Shenzhen Grubbs Institute, Southern University of Science and Technology, Shenzhen, Guangdong, 518055, P. R. China.

E-mail address: xiuqindong@whu.edu.cn.

**Table of Contents**

|      |                                                                  |    |
|------|------------------------------------------------------------------|----|
| I.   | General remark.....                                              | 2  |
| II.  | General procedure for the synthesis of substrates.....           | 2  |
| III. | General procedure of asymmetric hydrogenation of substrates..... | 7  |
| IV.  | Reference.....                                                   | 13 |
| V.   | NMR spectra.....                                                 | 14 |
| VI.  | HPLC spectra.....                                                | 36 |

## I. General remark

Unless otherwise noted, all reagents and solvents were purchased from commercial suppliers and used without further purification. Anhydrous solvents were purchased from J&K and transferred by syringe.  $^1\text{H}$  NMR and  $^{13}\text{C}$  NMR spectra were recorded on a Bruker ADVANCE III (400 MHz) spectrometer with  $\text{CDCl}_3$  as the solvent and tetramethylsilane (TMS) as the internal standard. Chemical shifts are reported in parts per million (ppm,  $\delta$  scale) downfield from TMS at 0.00 ppm and referenced to the  $\text{CDCl}_3$  at 7.26 ppm (for  $^1\text{H}$  NMR) or 77.00 ppm (for  $^{13}\text{C}$  NMR). Data are reported as: multiplicity (s = singlet, d = doublet, t = triplet, q = quartet, m = multiplet), coupling constant in hertz (Hz) and signal area integration in natural numbers.  $^{13}\text{C}$  NMR analyses were run with decoupling. Enantiomeric excess values were determined by Daicel chiral column on an Agilent 1260 Series HPLC instrument. Optical rotations  $[\alpha]_D$  were measured on a PERKIN ELMER polarimeter 343 instrument. Column Chromatography was performed with silica gel Merck 60 (300-400 mesh).

Substrate **1** were synthesized from the corresponding substituted aminophenol according to method A.<sup>[1]</sup> The corresponding substituted aminophenol of **1g** and **1h** were prepared according to method B.<sup>[2]</sup>

The absolute configuration of product **2d** is (*R*), which was determined by X-ray analysis.<sup>[3]</sup> The absolute configurations of other hydrogenation products were assigned by analogy.

## II. General procedure for the synthesis of substrates

### General procedure of method A

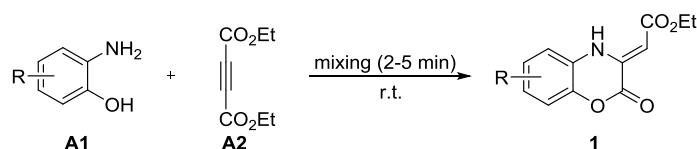

To a beaker with pre-weighted solid aminophenol (**A1**, 5 mmol), a dropwise of stoichiometric diethyl acetylenedicarboxylate (**A2**, 5 mmol) was added slowly and

stirred with the help of a spatula for 2-5 minutes. The liquid disappeared and a relatively exothermic phenomenon occurred, and then were purified by flash chromatography on silica gel. They were further purified through recrystallization in CH<sub>2</sub>Cl<sub>2</sub> and petroleum ether to give the substrate **1** (**1l** was prepared with dimethyl acetylenedicarboxylate).

### General procedure of method B

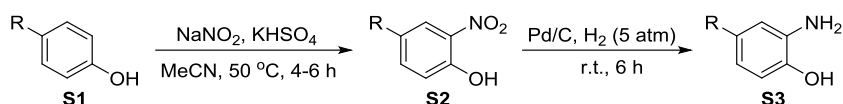

#### Step 1

To a stirred suspension of substituted phenol (**S1**, 10 mmol) in acetonitrile (30 mL), solid sodium nitrite (1.5 equiv.) and potassium hydrogen sulfate (2.0 equiv.) was then added. Later maintained the reaction temperature at 50 °C for 4-6 h and the crude product was analyzed by GC-MS. The reaction was vacuumed to evaporate acetonitrile and then extracted with H<sub>2</sub>O (30 mL) and ethanol acetate (30 mL×2). The organic layer was dried over Na<sub>2</sub>SO<sub>4</sub>, concentrated and purified by flash chromatography on silica gel to give the product for step 2.

#### Step 2

To a suspension of corresponding *O*-nitrophenol (**S2**) in dichloromethane, Pd/C powder (5 %) was added. In the atmosphere of H<sub>2</sub> at 5 atm and being stirred for 6 h, **S2** was hydrogenated to generate corresponding substituted aminophenol (**S3**). Then **S3** was used for the synthesis of **1g** and **1h** according to method A.

Ethyl (*Z*)-2-(2-oxo-2H-benzo[*b*][1,4]oxazin-3(4H)-ylidene)acetate **1a**

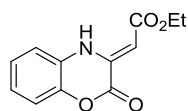

Yellow solid; <sup>1</sup>H NMR (400 MHz, Chloroform-*d*) δ = 10.68 (s, 1H), 7.15-7.11 (m, 2H), 7.02 (dd, *J* = 7.7, 1.6 Hz, 1H), 6.96 (dd, *J* = 8.3, 1.4 Hz, 1H), 5.92 (s, 1H), 4.23 (q, *J* = 7.1 Hz, 2H), 1.32 (t, *J* = 7.1 Hz, 3H); <sup>13</sup>C NMR (100 MHz, Chloroform-*d*) δ =

169.87, 155.92, 139.93, 137.98, 125.61, 124.17, 122.66, 116.96, 114.76, 91.10, 60.34, 14.23.

Ethyl (Z)-2-(6-fluoro-2-oxo-2H-benzo[b][1,4]oxazin-3(4H)-ylidene)acetate **1b**

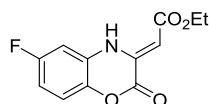

Yellow solid; m. p. 110-112 °C; <sup>1</sup>H NMR (400 MHz, Chloroform-*d*) δ = 10.70 (s, 1H), 7.10 (dd, *J* = 8.5, 4.9 Hz, 1H), 6.74-6.68 (m, 2H), 5.97 (s, 1H), 4.24 (q, *J* = 7.1 Hz, 2H), 1.33 (t, *J* = 7.1 Hz, 3H); <sup>13</sup>C NMR (100 MHz, Chloroform-*d*) δ = 169.74, 159.71 (d, *J* = 243.0 Hz), 155.58, 137.31, 136.11 (d, *J* = 3.0 Hz), 125.06 (d, *J* = 12.0 Hz), 118.13 (d, *J* = 9.0 Hz), 109.24 (d, *J* = 24.0 Hz), 101.91 (d, *J* = 28.0 Hz), 92.49, 60.59, 14.21. ESI-HRMS Calculated for C<sub>12</sub>H<sub>11</sub>FN<sub>2</sub>O<sub>4</sub><sup>+</sup> ([M+H]<sup>+</sup>): 252.0667; Found: 252.0665.

Ethyl (Z)-2-(6-chloro-2-oxo-2H-benzo[b][1,4]oxazin-3(4H)-ylidene)acetate **1c**

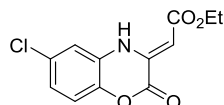

Yellow solid; <sup>1</sup>H NMR (400 MHz, Chloroform-*d*) δ = 10.69 (s, 1H), 7.08 (d, *J* = 9.2 Hz, 1H), 6.98-6.96 (m, 2H), 5.97 (s, 1H), 4.24 (q, *J* = 7.0 Hz, 2H), 1.33 (t, *J* = 7.0 Hz, 3H); <sup>13</sup>C NMR (100 MHz, Chloroform-*d*) δ = 169.67, 155.44, 138.48, 137.25, 130.82, 125.13, 122.49, 118.08, 114.64, 92.64, 60.61, 14.22.

Ethyl (Z)-2-(7-chloro-2-oxo-2H-benzo[b][1,4]oxazin-3(4H)-ylidene)acetate **1d**

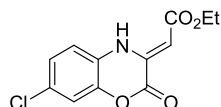

Yellow solid; <sup>1</sup>H NMR (400 MHz, Chloroform-*d*) δ = 10.69 (s, 1H), 7.15 (d, *J* = 1.9 Hz, 1H), 7.10 (dd, *J* = 8.5, 2.2 Hz, 1H), 6.89 (d, *J* = 8.5 Hz, 1H), 5.93 (s, 1H), 4.23 (q, *J* = 7.1 Hz, 2H), 1.32 (t, *J* = 7.1 Hz, 3H); <sup>13</sup>C NMR (100 MHz, Chloroform-*d*) δ = 169.78, 155.28, 140.13, 137.31, 127.41, 125.71, 123.02, 117.30, 115.48, 92.03, 60.53, 14.22.

Ethyl (Z)-2-(6-methyl-2-oxo-2H-benzo[b][1,4]oxazin-3(4H)-ylidene)acetate **1e**

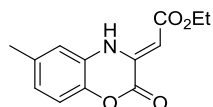

Yellow solid;  $^1\text{H}$  NMR (400 MHz, Chloroform-*d*)  $\delta$  = 10.61 (s, 1H), 7.00 (d,  $J$  = 8.3 Hz, 1H), 6.81- 6.78 (m, 1H), 6.75-6.74 (m, 1H), 5.89 (s, 1H), 4.22 (q,  $J$  = 7.1 Hz, 2H), 2.31 (s, 3H), 1.32 (t,  $J$  = 7.1 Hz, 3H);  $^{13}\text{C}$  NMR (100 MHz, Chloroform-*d*)  $\delta$  = 169.88, 156.09, 138.05, 137.93, 135.65, 123.73, 123.34, 116.60, 115.00, 90.81, 60.27, 20.91, 14.24.

Ethyl (Z)-2-(7-methyl-2-oxo-2H-benzo[b][1,4]oxazin-3(4H)-ylidene)acetate **1f**

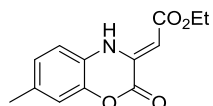

Yellow solid;  $^1\text{H}$  NMR (400 MHz, Chloroform-*d*)  $\delta$  = 10.63 (s, 1H), 6.93-6.91 (m, 2H), 6.84-6.82 (m, 1H), 5.87 (s, 1H), 4.21 (q,  $J$  = 7.1 Hz, 2H), 2.31 (s, 3H), 1.31 (t,  $J$  = 7.1 Hz, 3H);  $^{13}\text{C}$  NMR (100 MHz, Chloroform-*d*)  $\delta$  = 169.97, 156.10, 139.76, 138.04, 132.93, 126.22, 121.65, 117.19, 114.46, 90.26, 60.23, 20.77, 14.25.

Ethyl (Z)-2-(6-methoxy-2-oxo-2H-benzo[b][1,4]oxazin-3(4H)-ylidene)acetate **1g**

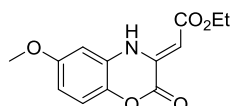

Yellow solid; m.p. 135-136 °C;  $^1\text{H}$  NMR (400 MHz, Chloroform-*d*)  $\delta$  = 10.69 (s, 1H), 7.06 (d,  $J$  = 9.0 Hz, 1H), 6.55 (dd,  $J$  = 9.0, 2.8 Hz, 1H), 6.48 (d,  $J$  = 2.8 Hz, 1H), 5.93 (s, 1H), 4.24 (q,  $J$  = 7.1 Hz, 2H), 3.79 (s, 3H), 1.33 (t,  $J$  = 7.1 Hz, 3H);  $^{13}\text{C}$  NMR (100 MHz, Chloroform-*d*)  $\delta$  = 169.97, 157.21, 156.06, 137.99, 134.13, 124.67, 117.68, 108.40, 99.73, 91.28, 60.40, 55.72, 14.25. ESI-HRMS Calculated for  $\text{C}_{13}\text{H}_{13}\text{NNaO}_5^+$  ( $[\text{M}+\text{Na}]^+$ ): 286.0686; Found: 286.0684.

Ethyl (Z)-2-(6-(tert-butyl)-2-oxo-2H-benzo[b][1,4]oxazin-3(4H)-ylidene)acetate **1h**

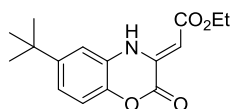

Yellow solid;  $^1\text{H}$  NMR (400 MHz, Chloroform-*d*)  $\delta$  = 10.71 (s, 1H), 7.08-7.03 (m, 2H), 6.97 (d,  $J$  = 2.1 Hz, 1H), 5.91 (s, 1H), 4.25 (q,  $J$  = 7.1 Hz, 2H), 1.34 (t,  $J$  = 7.1 Hz, 3H), 1.31 (s, 9H);  $^{13}\text{C}$  NMR (100 MHz, Chloroform-*d*)  $\delta$  = 170.08, 156.22, 149.27, 138.28, 137.85, 123.50, 119.92, 116.42, 111.91, 90.66, 60.33, 34.62, 31.27, 14.28.

Ethyl (Z)-2-(5-methyl-2-oxo-2H-benzo[b][1,4]oxazin-3(4H)-ylidene)acetate **1i**

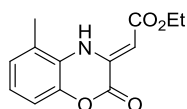

Yellow solid; m. p. 142-143 °C;  $^1\text{H}$  NMR (400 MHz, Chloroform-*d*)  $\delta$  = 10.85 (s, 1H), 7.02-6.99 (m, 2H), 6.92 (t,  $J$  = 7.8 Hz, 1H), 5.94 (s, 1H), 4.25 (q,  $J$  = 7.1 Hz, 2H), 2.37 (s, 3H), 1.34 (t,  $J$  = 7.1 Hz, 3H);  $^{13}\text{C}$  NMR (100 MHz, Chloroform-*d*)  $\delta$  = 170.22, 156.04, 140.02, 138.10, 126.72, 123.13, 122.74, 122.17, 114.73, 91.02, 60.37, 16.16, 14.30. ESI-HRMS Calculated for  $\text{C}_{13}\text{H}_{14}\text{NO}_4^+$  ( $[\text{M}+\text{H}]^+$ ): 248.0917; Found: 248.0918.

Ethyl (Z)-2-(2-oxo-6-(trifluoromethyl)-2H-benzo[b][1,4]oxazin-3(4H)-ylidene)acetate **1j**

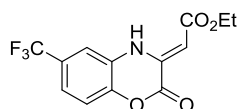

Green solid; m.p. 120-121 °C;  $^1\text{H}$  NMR (400 MHz, Chloroform-*d*)  $\delta$  = 10.80 (s, 1H), 7.29-7.22 (m, 3H), 5.99 (s, 1H), 4.25 (q,  $J$  = 7.1 Hz, 2H), 1.33 (t,  $J$  = 7.1 Hz, 3H);  $^{13}\text{C}$  NMR (100 MHz, Chloroform-*d*)  $\delta$  = 169.59, 155.18, 141.91 (d,  $J$  = 1.0 Hz), 137.14, 128.16 (q,  $J$  = 3.3 Hz), 124.67 (d,  $J$  = 2.0 Hz), 119.54 (d,  $J$  = 3.0 Hz), 117.58, 112.12 (d,  $J$  = 4.0 Hz), 112.05 (d,  $J$  = 4.0 Hz), 93.16, 60.72, 14.19.

Methyl (Z)-2-(2-oxo-2H-benzo[b][1,4]oxazin-3(4H)-ylidene)acetate **1k**

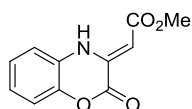

Yellow solid;  $^1\text{H}$  NMR (400 MHz, Chloroform-*d*)  $\delta$  = 10.67 (s, 1H), 7.16-7.12 (m, 2H), 7.04-6.96 (m, 2H), 5.93 (s, 1H), 3.78 (s, 3H);  $^{13}\text{C}$  NMR (100 MHz, Chloroform-*d*)  $\delta$  = 170.26, 155.91, 139.95, 138.10, 125.68, 124.10, 122.80, 117.02, 114.81, 90.65, 51.49.

### III. General procedure of asymmetric hydrogenation of substrates

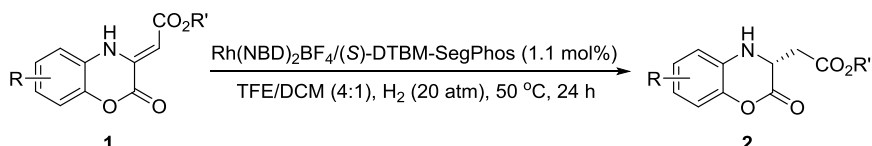

A mixture of  $\text{Rh}(\text{NBD})_2\text{BF}_4$  (0.003 mmol, 1.1 mg) with (*S*)-DTBM-SegPhos (0.0033 mmol, 3.9 mg) resolved in anhydrous trifluoroethanol (TFE, 1 mL) was accomplished in a Ar-filled glovebox. The mixed solution was then stirred at room temperature for 40 min in the glovebox. An aliquot of the catalyst solution (0.3 mL, 0.001 mmol) was transferred by syringe into the vials charged with different substrates **1** (0.1 mmol for each) in anhydrous TFE (0.5 mL) together with anhydrous  $\text{CH}_2\text{Cl}_2$  (0.2 mL). The vials were subsequently transferred into an autoclave into which hydrogen gas was charged. The reaction was then stirred under  $\text{H}_2$  (20 atm) at 50 °C for 24 h. After completed, the hydrogen gas was released slowly and carefully. The solution was concentrated and passed through a short column of silica gel (eluant: EA) to remove the metal complex. And it was purified by flash chromatography on silica gel. The ee values of all compounds were determined by HPLC on a chiral stationary phase.

(*R*)-Ethyl 2-(2-oxo-3,4-dihydro-2H-benzo[*b*][1,4]oxazin-3-yl)acetate **2a**

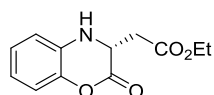

Brown solid; m.p. 66-68 °C; 96% conv., 21.9 mg, 93% yield, 97% ee;  $[\alpha]_{\text{D}}^{20} = +3.14$  ( $c = 0.7$ ,  $\text{CHCl}_3$ ); The enantiomeric excess was determined by HPLC on Chiralcel OD-H column, hexane: isopropanol = 95:5; flow rate = 1.0 mL/min; UV detection at 210 nm;  $t_{\text{R}} = 16.5$  min (major), 17.8 min (minor).  $^1\text{H}$  NMR (400 MHz, Chloroform-*d*)

$\delta = 7.04$ - $6.99$  (m, 2H),  $6.88$ - $6.84$  (m, 1H),  $6.81$ - $6.78$  (m, 1H),  $4.76$  (s, 1H),  $4.29$  (dt,  $J = 10.3, 2.7$  Hz, 1H),  $4.24$ - $4.19$  (m, 2H),  $3.18$  (dd,  $J = 17.5, 2.9$  Hz, 1H),  $2.82$  (dd,  $J = 17.5, 10.3$  Hz, 1H),  $1.30$  (t,  $J = 7.1$  Hz, 3H);  $^{13}\text{C}$  NMR (100 MHz, Chloroform-*d*)  $\delta = 171.26, 165.61, 140.94, 132.32, 125.16, 120.56, 116.87, 115.39, 61.39, 51.40, 35.58, 14.11$ . ESI-HRMS Calculated for  $\text{C}_{12}\text{H}_{14}\text{NO}_4^+$  ( $[\text{M}+\text{H}]^+$ ): 236.0917; Found: 236.0918.

(*R*)-ethyl 2-(6-fluoro-2-oxo-3,4-dihydro-2H-benzo[*b*][1,4]oxazin-3-yl)acetate **2b**

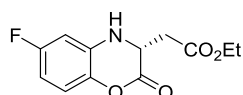

Brown solid; m.p.  $116$ - $118$  °C; 92% conv., 23.2 mg, 92% yield, 97% ee;  $[\alpha]_{\text{D}}^{20} = +2.5$  ( $c = 0.8, \text{CHCl}_3$ ); The enantiomeric excess was determined by HPLC on Chiralcel OD-H column, hexane: isopropanol = 97:3; flow rate = 0.5 mL/min; UV detection at 210 nm;  $t_{\text{R}} = 52.9$  min (minor), 54.9 min (major).  $^1\text{H}$  NMR (400 MHz, Chloroform-*d*)  $\delta = 6.96$  (dd,  $J = 8.7, 5.0$  Hz, 1H),  $6.54$ - $6.50$  (m, 2H),  $4.87$  (s, 1H),  $4.30$ - $4.19$  (m, 3H),  $3.17$  (dd,  $J = 17.6, 2.8$  Hz, 1H),  $2.81$  (dd,  $J = 17.6, 10.4$  Hz, 1H),  $1.30$  (t,  $J = 7.2$  Hz, 3H);  $^{13}\text{C}$  NMR (100 MHz, Chloroform-*d*)  $\delta = 171.14, 165.07, 159.68$  (d,  $J = 241.0$  Hz),  $136.86$  (d,  $J = 2.0$  Hz),  $133.28$  (d,  $J = 11.0$  Hz),  $117.70$  (d,  $J = 10.0$  Hz),  $106.66$  (d,  $J = 24.0$  Hz),  $102.33$  (d,  $J = 27.0$  Hz),  $61.48, 50.93, 35.57, 14.06$ . ESI-HRMS Calculated for  $\text{C}_{13}\text{H}_{17}\text{FNO}_5^+$  ( $[\text{M}+\text{CH}_3\text{OH}+\text{H}]^+$ ): 286.1085; Found: 286.1083.

(*R*)-Ethyl 2-(6-chloro-2-oxo-3,4-dihydro-2H-benzo[*b*][1,4]oxazin-3-yl)acetate **2c**

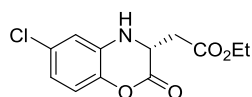

White solid; m.p.  $104$ - $108$  °C; >99% conv., 22.9 mg, 85% yield, >99% ee;  $[\alpha]_{\text{D}}^{20} = +44.2$  ( $c = 0.6, \text{CHCl}_3$ ); The enantiomeric excess was determined by HPLC on Chiralpak AD-H column, hexane: isopropanol = 97:3; flow rate = 1.0 mL/min; UV detection at 210 nm;  $t_{\text{R}} = 31.5$  min (minor), 36.2 min (major).  $^1\text{H}$  NMR (400 MHz, Chloroform-*d*)  $\delta = 6.95$ - $6.92$  (m, 1H),  $6.83$ - $6.79$  (m, 2H),  $4.85$  (s, 1H),  $4.30$ - $4.19$  (m, 3H),  $3.16$  (dd,  $J = 17.7, 2.8$  Hz, 1H),  $2.81$  (dd,  $J = 17.6, 10.5$  Hz, 1H),  $1.29$  (t,  $J = 7.1$



Hz, 3H);  $^{13}\text{C}$  NMR (100 MHz, Chloroform-*d*)  $\delta$  = 171.09, 164.88, 139.33, 133.18, 130.16, 120.24, 117.85, 115.16, 61.53, 51.01, 35.55, 14.09. ESI-HRMS Calculated for  $\text{C}_{13}\text{H}_{17}\text{ClNO}_5^+$  ( $[\text{M}+\text{CH}_3\text{OH}+\text{H}]^+$ ): 302.0790; Found: 302.0789.

(*R*)-Ethyl 2-(7-chloro-2-oxo-3,4-dihydro-2H-benzo[*b*][1,4]oxazin-3-yl)acetate **2d**

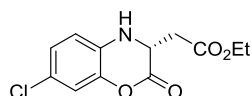

Yellow solid; m.p. 108-110 °C; >99% conv., 23.9 mg, 89% yield, >99% ee;  $[\alpha]_{\text{D}}^{20}$  = +61.8 (*c* = 0.6,  $\text{CHCl}_3$ ); The enantiomeric excess was determined by HPLC on Chiralcel OD-H column, hexane: isopropanol = 98:2; flow rate = 1.0 mL/min; UV detection at 210 nm;  $t_{\text{R}}$  = 27.4 min (major), 37.4 min (minor).  $^1\text{H}$  NMR (400 MHz, Chloroform-*d*)  $\delta$  = 7.03 (d, *J* = 2.2 Hz, 1H), 6.98 (dd, *J* = 8.4, 2.3 Hz, 1H), 6.72 (d, *J* = 8.4 Hz, 1H), 4.81 (s, 1H), 4.28-4.18 (m, 3H), 3.17 (dd, *J* = 17.6, 2.8 Hz, 1H), 2.81 (dd, *J* = 17.6, 10.3 Hz, 1H), 1.30 (t, *J* = 7.2 Hz, 3H);  $^{13}\text{C}$  NMR (100 MHz, Chloroform-*d*)  $\delta$  = 171.16, 164.84, 141.04, 131.03, 125.07, 125.00, 117.14, 116.08, 61.50, 51.19, 35.47, 14.09. ESI-HRMS Calculated for  $\text{C}_{13}\text{H}_{17}\text{ClNO}_5^+$  ( $[\text{M}+\text{CH}_3\text{OH}+\text{H}]^+$ ): 302.0790; Found: 302.0789.

(*R*)-Ethyl 2-(6-methyl-2-oxo-3,4-dihydro-2H-benzo[*b*][1,4]oxazin-3-yl)acetate **2e**

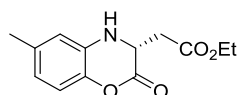

White solid; m.p. 68-70 °C; >99% conv., 22.9 mg, 92% yield, 97% ee;  $[\alpha]_{\text{D}}^{20}$  = +41.2 (*c* = 0.8,  $\text{CHCl}_3$ ); The enantiomeric excess was determined by HPLC on Chiralpak AD-H column, hexane: isopropanol = 98:2; flow rate = 1.0 mL/min; UV detection at 210 nm;  $t_{\text{R}}$  = 35.7 min (major), 39.6 min (minor).  $^1\text{H}$  NMR (400 MHz, Chloroform-*d*)  $\delta$  = 6.90 (d, *J* = 8.1 Hz, 1H), 6.66-6.60 (m, 2H), 4.68 (s, 1H), 4.27-4.18 (m, 3H), 3.15 (dd, *J* = 17.5, 2.8 Hz, 1H), 2.80 (dd, *J* = 17.5, 10.4 Hz, 1H), 2.27 (s, 3H), 1.29 (t, *J* = 7.1 Hz, 3H);  $^{13}\text{C}$  NMR (100 MHz, Chloroform-*d*)  $\delta$  = 171.24, 165.78, 138.90, 135.00, 131.95, 121.08, 116.49, 115.81, 61.33, 51.40, 35.51, 20.90, 14.08. ESI-HRMS

Calculated for  $C_{13}H_{15}NNaO_4^+$  ( $[M+Na]^+$ ): 272.0893; Found: 272.0892.

(*R*)-Ethyl 2-(7-methyl-2-oxo-3,4-dihydro-2H-benzo[*b*][1,4]oxazin-3-yl)acetate **2f**

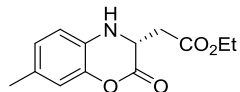

White solid; m.p. 49-50 °C; >99% conv., 22.2 mg, 89% yield, 99% ee;  $[\alpha]_D^{20} = -1.7$  ( $c = 0.5$ ,  $CHCl_3$ ); The enantiomeric excess was determined by HPLC on Chiralcel OD-H column, hexane: isopropanol = 95:5; flow rate = 1.0 mL/min; UV detection at 210 nm;  $t_R = 16.2$  min (major), 19.9 min (minor).  $^1H$  NMR (400 MHz, Chloroform-*d*)  $\delta = 6.84$ -6.80 (m, 2H), 6.69 (d,  $J = 7.9$  Hz, 1H), 4.63 (s, 1H), 4.25-4.18 (m, 3H), 3.16 (dd,  $J = 17.5, 2.9$  Hz, 1H), 2.81 (dd,  $J = 17.5, 10.3$  Hz, 1H), 2.28 (s, 3H), 1.29 (t,  $J = 7.2$  Hz, 3H);  $^{13}C$  NMR (100 MHz, Chloroform-*d*)  $\delta = 171.26, 165.88, 140.89, 130.52, 129.75, 125.59, 117.19, 115.27, 61.32, 51.55, 35.44, 20.57, 14.08$ . ESI-HRMS Calculated for  $C_{13}H_{16}NO_4^+$  ( $[M+H]^+$ ): 250.1074; Found: 250.1082.

(*R*)-Ethyl 2-(6-methoxy-2-oxo-3,4-dihydro-2H-benzo[*b*][1,4]oxazin-3-yl)acetate **2g**

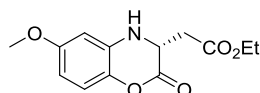

White solid; m.p. 72-74 °C; >99% conv., 22.6 mg, 85% yield, 98% ee;  $[\alpha]_D^{20} = +11.4$  ( $c = 0.07$ ,  $CHCl_3$ ); The enantiomeric excess was determined by HPLC on Chiralcel OD-H column, hexane: isopropanol = 98:2; flow rate = 1.0 mL/min; UV detection at 210 nm;  $t_R = 46.0$  min (minor), 58.5 min (major).  $^1H$  NMR (400 MHz, Chloroform-*d*)  $\delta = 6.93$  (d,  $J = 8.8$  Hz, 1H), 6.40-6.33 (m, 2H), 4.76 (s, 1H), 4.27-4.20 (m, 3H), 3.75 (s, 3H), 3.16 (dd,  $J = 17.5, 2.7$  Hz, 1H), 2.80 (dd,  $J = 17.6, 10.4$  Hz, 1H), 1.30 (t,  $J = 7.1$  Hz, 3H);  $^{13}C$  NMR (100 MHz, Chloroform-*d*)  $\delta = 171.32, 165.64, 156.96, 135.11, 133.00, 117.39, 105.45, 100.92, 61.40, 55.57, 51.26, 35.53, 14.10$ . ESI-HRMS Calculated for  $C_{14}H_{20}NO_6^+$  ( $[M+CH_3OH+H]^+$ ): 298.1285; Found: 298.1322.

(*R*)-Ethyl 2-(6-(tert-butyl)-2-oxo-3,4-dihydro-2H-benzo[*b*][1,4]oxazin-3-yl)acetate **2h**

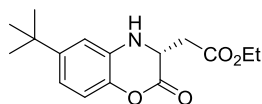

White solid; m.p. 79-81 °C; >99% conv., 25.0 mg, 86% yield, 92% ee;  $[\alpha]_D^{20} = +11.4$  ( $c = 0.5$ ,  $\text{CHCl}_3$ ); The enantiomeric excess was determined by HPLC on Chiralcel OD-H column, hexane: isopropanol = 98:2; flow rate = 1.0 mL/min; UV detection at 210 nm;  $t_R = 17.1$  min (major), 19.6 min (minor).  $^1\text{H}$  NMR (400 MHz, Chloroform-*d*)  $\delta = 6.95$  (d,  $J = 8.5$  Hz, 1H), 6.87 (dd,  $J = 8.5, 2.1$  Hz, 1H), 6.81 (d,  $J = 2.2$  Hz, 1H), 4.73 (s, 1H), 4.28-4.19 (m, 3H), 3.20 (dd,  $J = 17.5, 2.8$  Hz, 1H), 2.82 (dd,  $J = 17.6, 10.4$  Hz, 1H), 1.31 (t,  $J = 7.2$  Hz, 3H), 1.28 (s, 9H);  $^{13}\text{C}$  NMR (100 MHz, Chloroform-*d*)  $\delta = 171.47, 165.92, 148.58, 138.85, 131.72, 117.68, 116.27, 112.58, 61.41, 51.50, 35.69, 34.50, 31.38, 14.16$ . ESI-HRMS Calculated for  $\text{C}_{16}\text{H}_{21}\text{NNaO}_4^+$  ( $[\text{M}+\text{Na}]^+$ ): 314.1363; Found: 314.1381.

(*R*)-Ethyl 2-(5-methyl-2-oxo-3,4-dihydro-2H-benzo[*b*][1,4]oxazin-3-yl)acetate **2i**

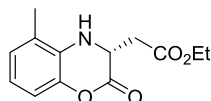

White solid; m.p. 74-76 °C; 92% conv., 21.9 mg, 88% yield, 97% ee;  $[\alpha]_D^{20} = +55.0$  ( $c = 0.6$ ,  $\text{CHCl}_3$ ); The enantiomeric excess was determined by HPLC on Chiralcel OD-H column, hexane: isopropanol = 97:3; flow rate = 1.0 mL/min; UV detection at 210 nm;  $t_R = 15.6$  min (major), 17.1 min (minor).  $^1\text{H}$  NMR (400 MHz, Chloroform-*d*)  $\delta = 6.91$ -6.89 (m, 2H), 6.77 (t,  $J = 7.8$  Hz, 1H), 4.83 (s, 1H), 4.26-4.21 (m, 3H), 3.17 (dd,  $J = 17.5, 2.8$  Hz, 1H), 2.83 (dd,  $J = 17.5, 10.5$  Hz, 1H), 2.21 (s, 3H), 1.30 (t,  $J = 7.1$  Hz, 3H);  $^{13}\text{C}$  NMR (100 MHz, Chloroform-*d*)  $\delta = 171.41, 165.71, 140.85, 130.70, 126.35, 123.73, 119.88, 114.68, 61.39, 51.35, 35.37, 16.40, 14.12$ . ESI-HRMS Calculated for  $\text{C}_{13}\text{H}_{16}\text{NO}_4^+$  ( $[\text{M}+\text{H}]^+$ ): 250.1074; Found: 250.1073.

(*R*)-Ethyl 2-(2-oxo-6-(trifluoromethyl)-3,4-dihydro-2H-benzo[*b*][1,4]oxazin-3-yl)acetate **2j**

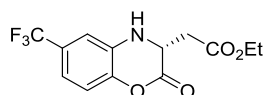

White solid; m.p. 149-151 °C; 81% conv., 24.2 mg, 80% yield, 88% ee;  $[\alpha]_D^{20} = -2.1$  ( $c = 0.9$ ,  $\text{CHCl}_3$ ); The enantiomeric excess was determined by HPLC on Chiralpak AD-H column, hexane: isopropanol = 95:5; flow rate = 1.0 mL/min; UV detection at 210 nm;  $t_R = 16.5$  min (major), 18.3 min (minor).  $^1\text{H}$  NMR (400 MHz, Chloroform-*d*)  $\delta$  7.14–7.09 (m, 2H), 7.06-7.05 (m, 1H), 5.00 (s, 1H), 4.35-4.32 (m, 1H), 4.27-4.19 (m, 2H), 3.19 (dd,  $J = 17.5$ , 2.8 Hz, 1H), 2.84 (dd,  $J = 17.6$ , 10.3 Hz, 1H), 1.31 (t,  $J = 7.2$  Hz, 3H);  $^{13}\text{C}$  NMR (100 MHz, Chloroform-*d*)  $\delta = 171.05$ , 164.56, 142.76, 132.52, 127.58 (d,  $J = 33.0$  Hz), 117.46 (d,  $J = 4.0$  Hz), 117.23, 112.38 (d,  $J = 3.0$  Hz), 61.61, 51.07, 35.64, 14.09. ESI-HRMS Calculated for  $\text{C}_{14}\text{H}_{17}\text{F}_3\text{NO}_5^+$  ( $[\text{M}+\text{CH}_3\text{OH}+\text{H}]^+$ ): 336.1053; Found: 336.1051.

(*R*)-Methyl 2-(2-oxo-3,4-dihydro-2H-benzo[*b*][1,4]oxazin-3-yl)acetate **2k**

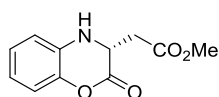

Brown solid; m.p. 122-124 °C; 92% conv., 19.2 mg, 87% yield, 99% ee;  $[\alpha]_D^{20} = +4.0$  ( $c = 0.3$ ,  $\text{CHCl}_3$ ); The enantiomeric excess was determined by HPLC on Chiralpak AD-H column, hexane: isopropanol = 95:5; flow rate = 1.0 mL/min; UV detection at 210 nm;  $t_R = 32.7$  min (minor), 41.0 min (major).  $^1\text{H}$  NMR (400 MHz, Chloroform-*d*)  $\delta = 7.04$ -6.99 (m, 2H), 6.88-6.79 (m, 2H), 4.29 (dd,  $J = 10.3$ , 2.8 Hz, 1H), 3.76 (s, 3H), 3.20 (dd,  $J = 17.6$ , 2.8 Hz, 1H), 2.84 (dd,  $J = 17.6$ , 10.3 Hz, 1H);  $^{13}\text{C}$  NMR (100 MHz, Chloroform-*d*)  $\delta = 171.72$ , 165.58, 140.91, 132.26, 125.18, 120.60, 116.87, 115.41, 52.31, 51.34, 35.34. ESI-HRMS Calculated for  $\text{C}_{12}\text{H}_{16}\text{NO}_5^+$  ( $[\text{M}+\text{CH}_3\text{OH}+\text{H}]^+$ ): 254.1023; Found: 254.1020.

#### IV. Reference

- [1] G. Choudhary, R. K. Peddinti, *Green Chem.* **2011**, *13*, 3290.
- [2] M. M. Heravi, H. A. Oskooie and B. Baghernejad, *J. Chin. Chem. Soc.* **2007**, *54*, 767.
- [3] The X-ray crystal data of compound **2d** has been deposited with the Cambridge Crystallographic Data Centre as supplementary publication no. CCDC 1905706. Copies of the data can be obtained, free of charge, on application to the CCDC, 12 Union Road, Cambridge CB21EZ, UK [Fax: +44 (1223)336033 or Email: [deposit@ccdc.cam.ac.uk](mailto:deposit@ccdc.cam.ac.uk)].

## V. NMR spectra

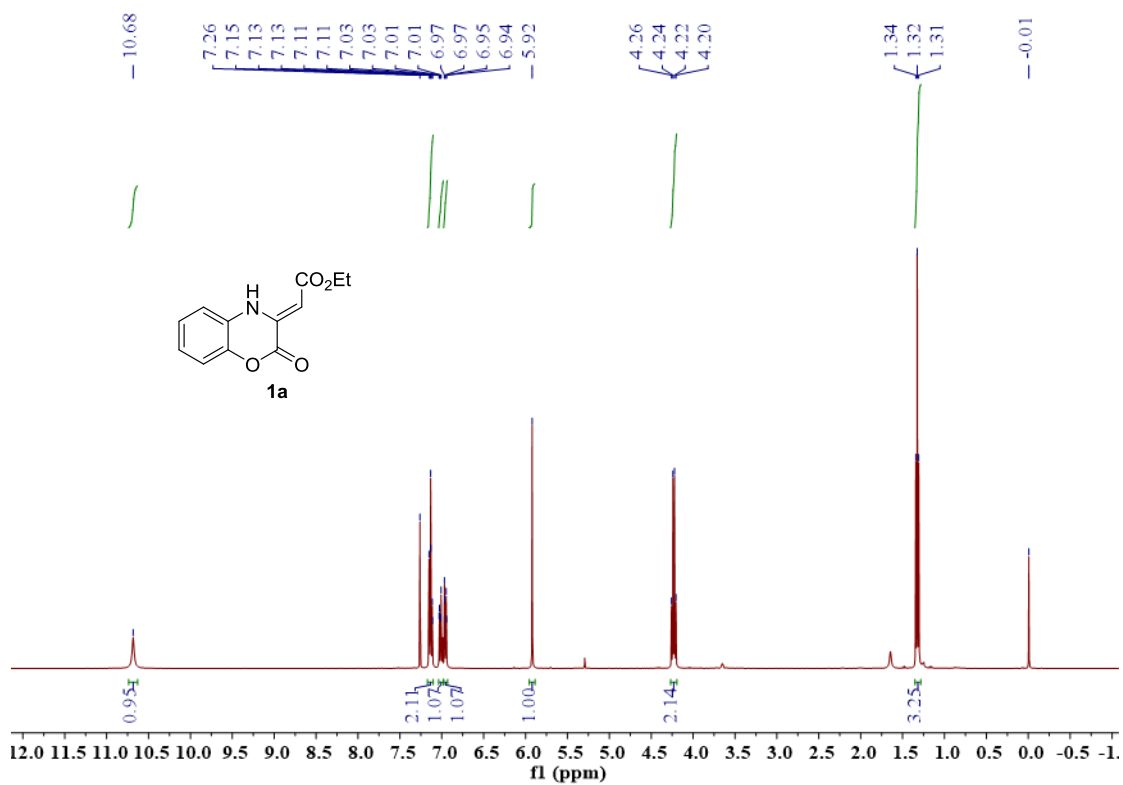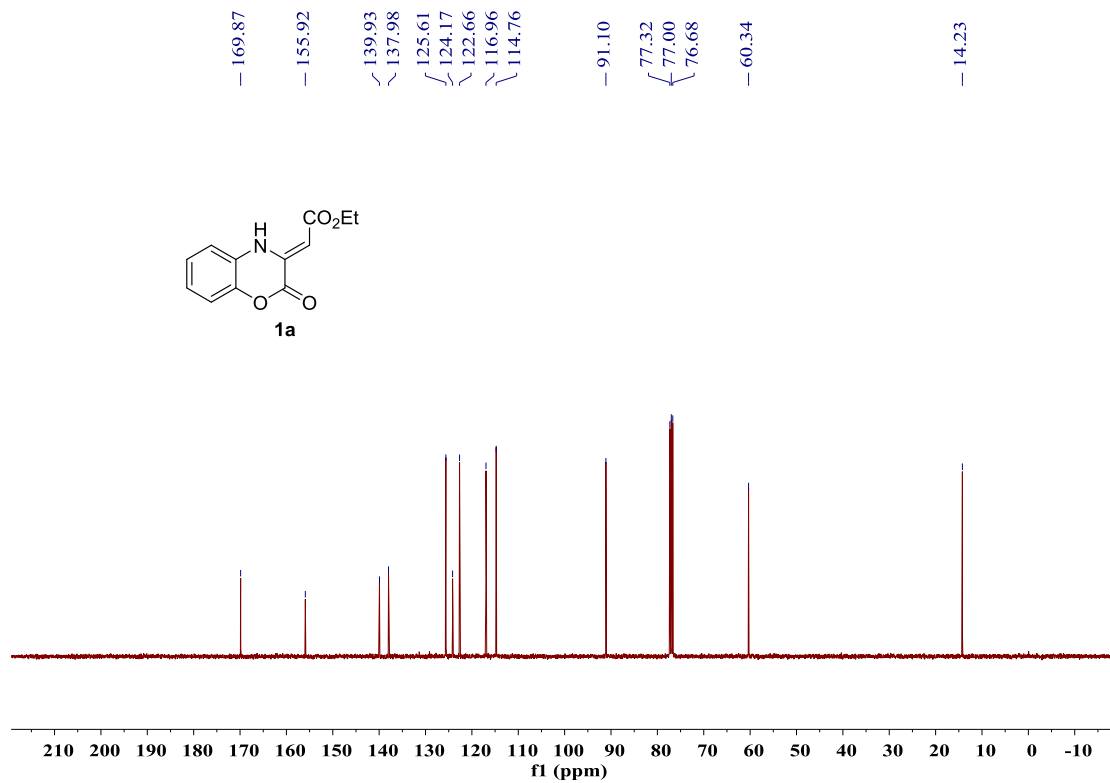

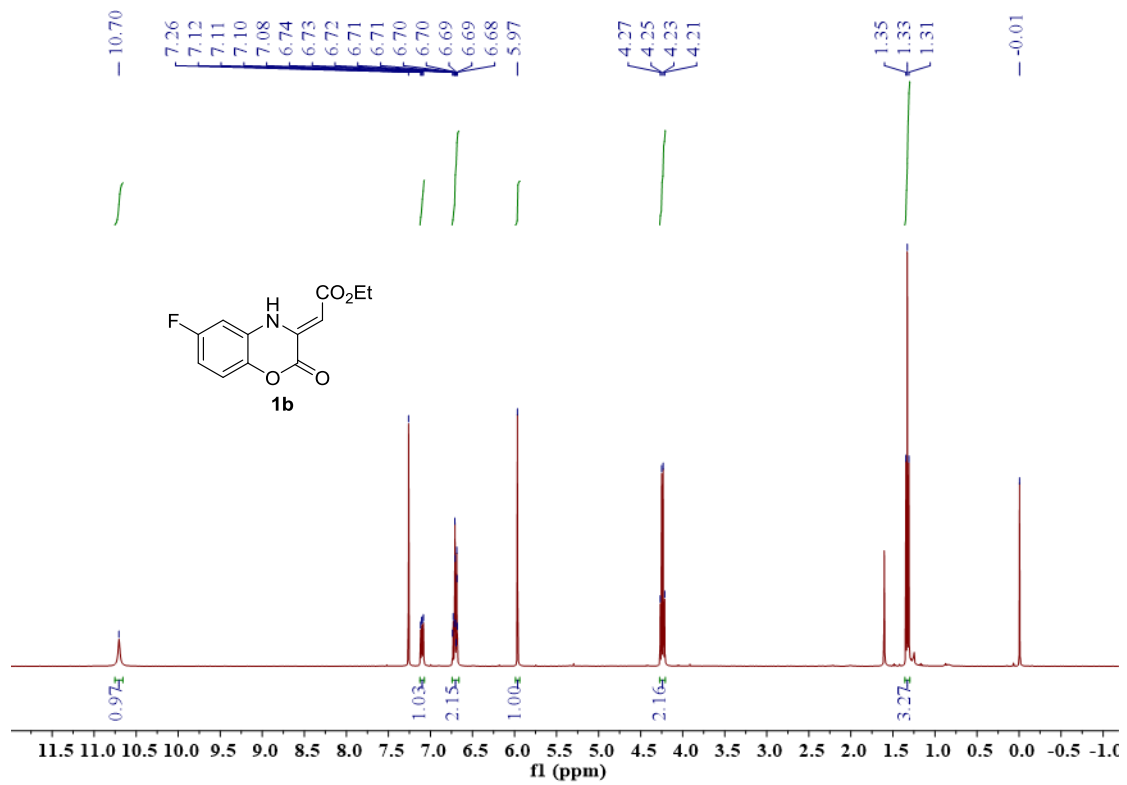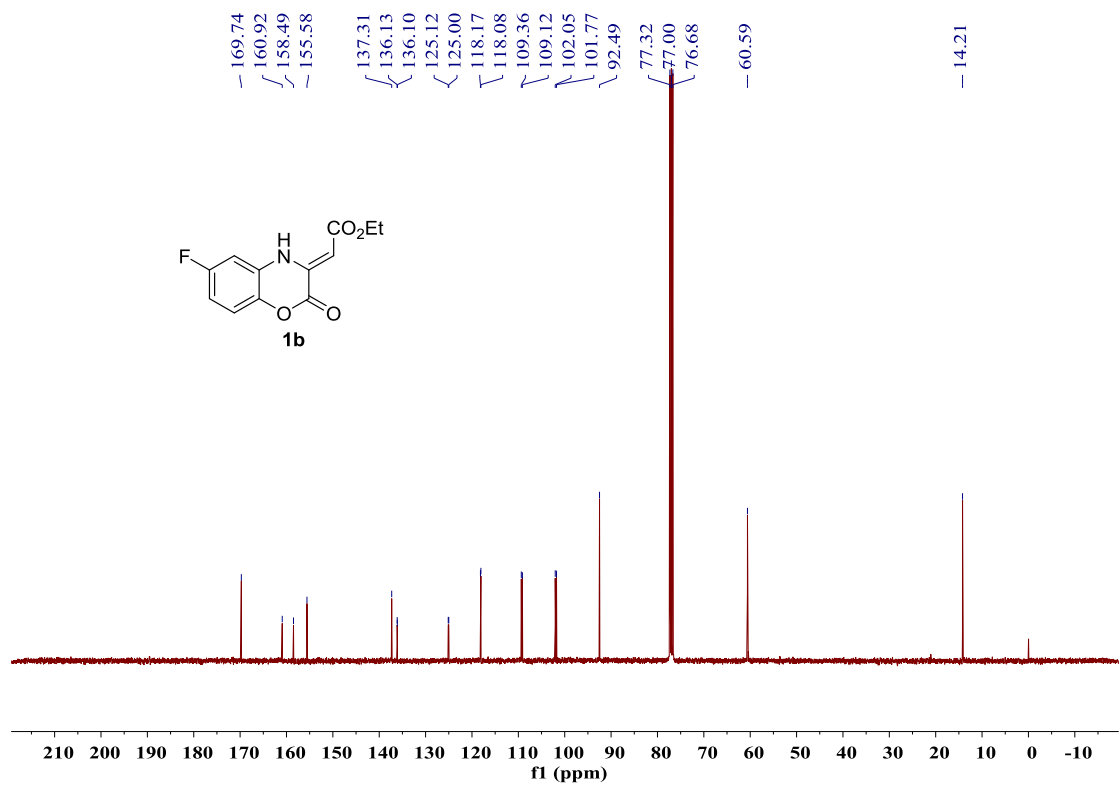

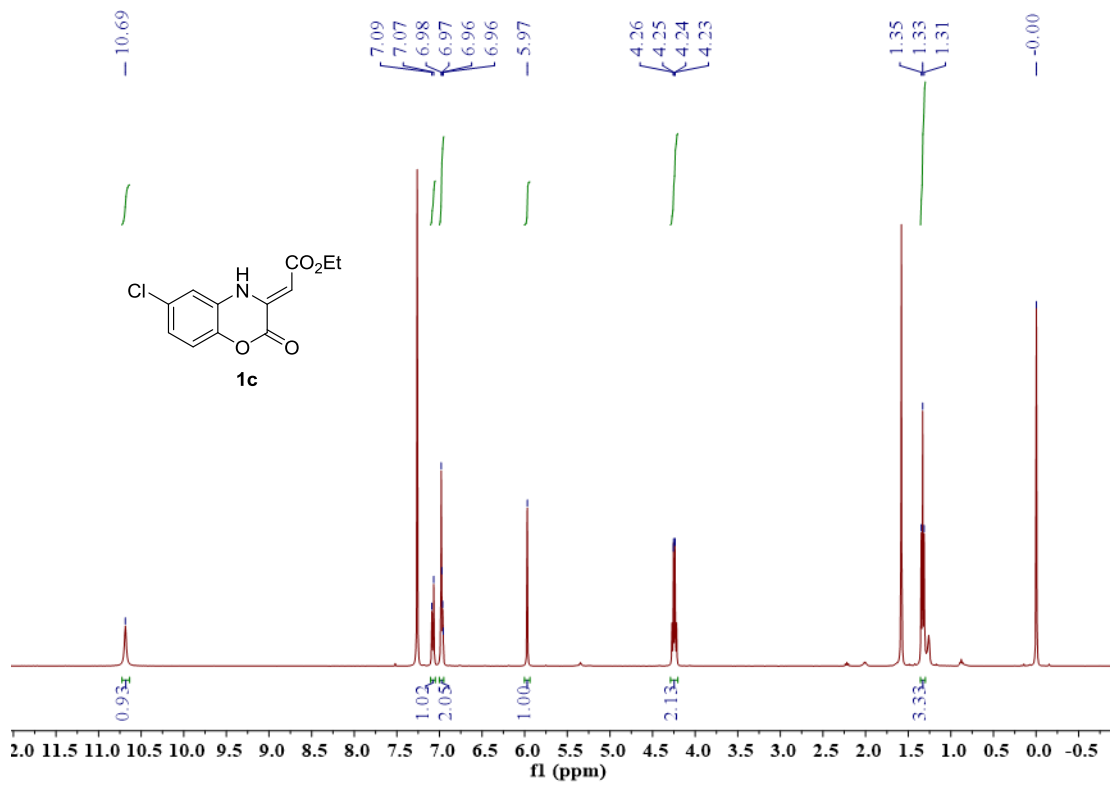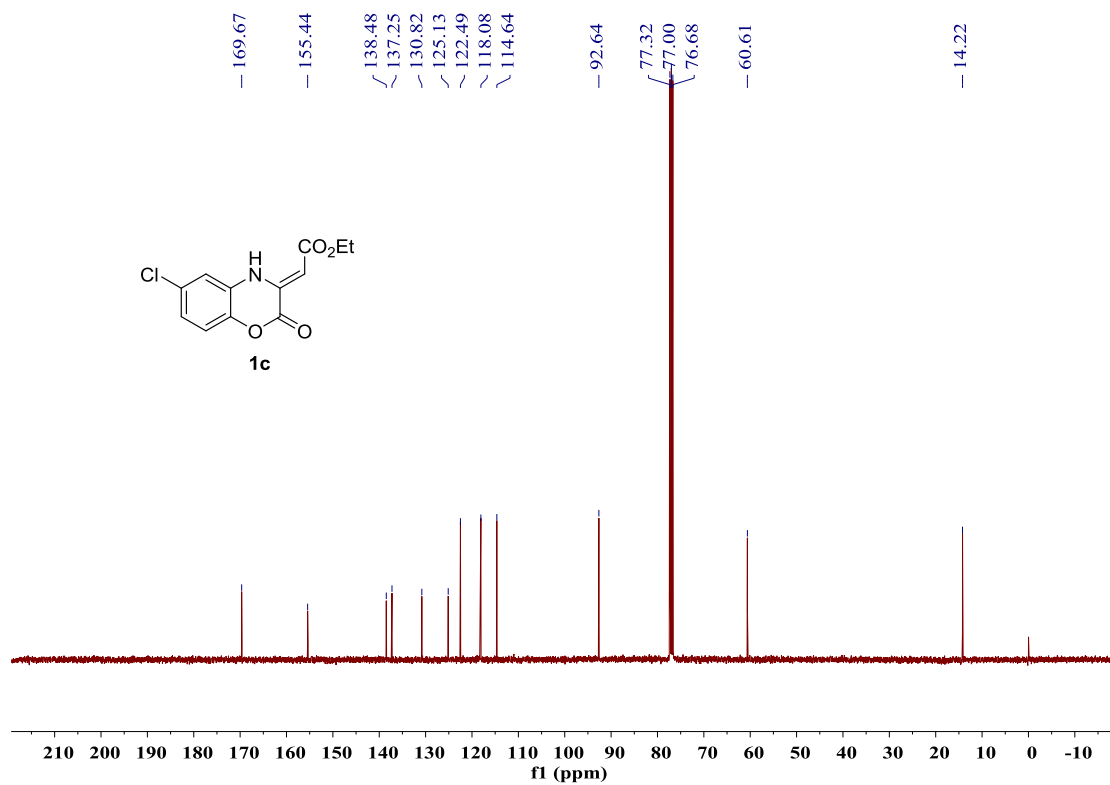



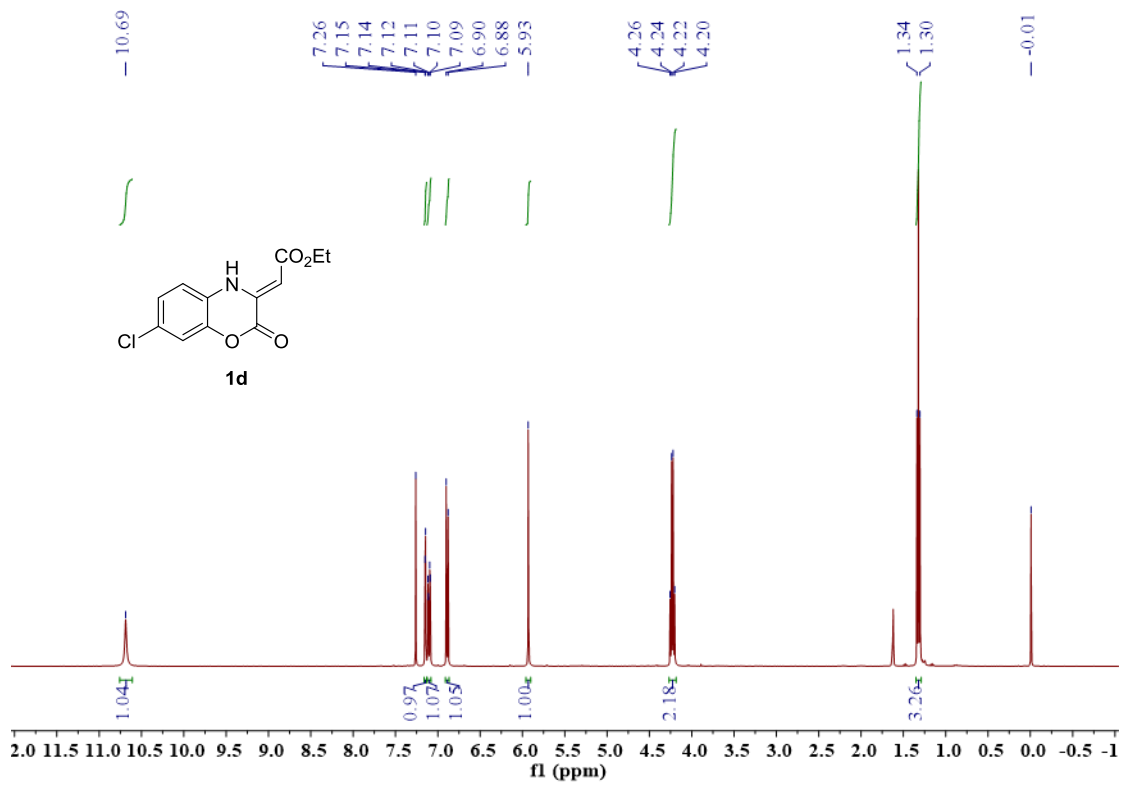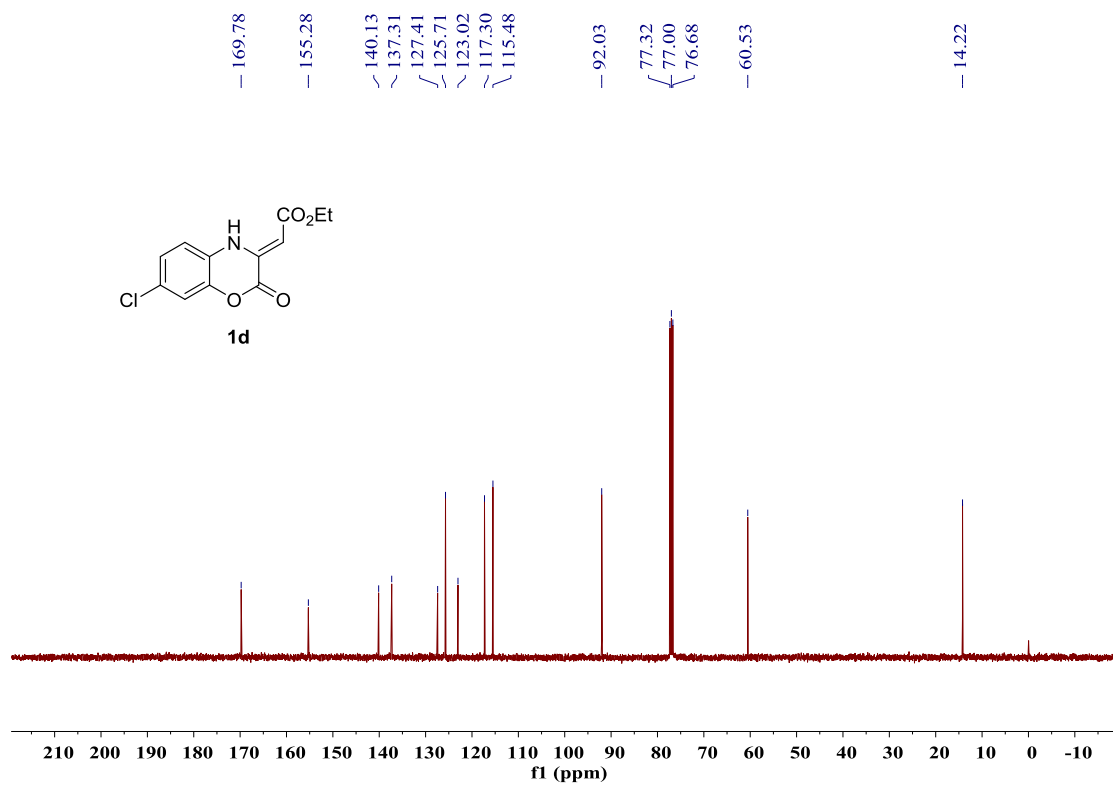

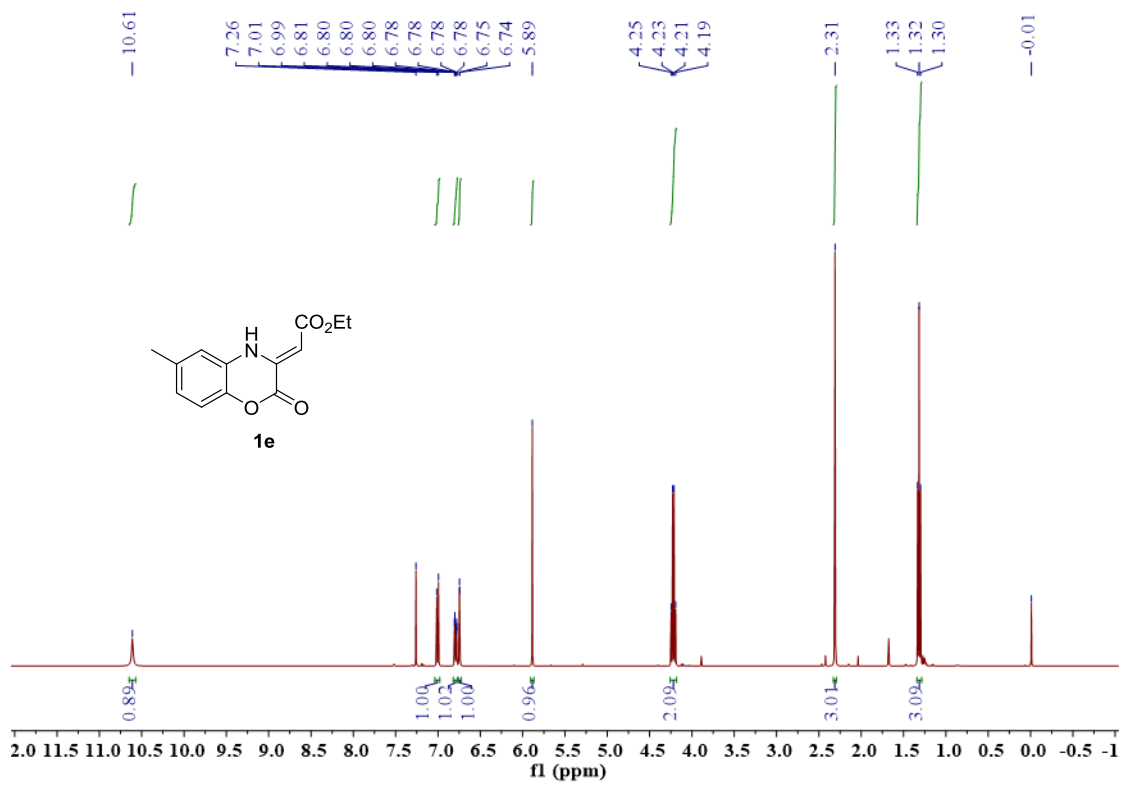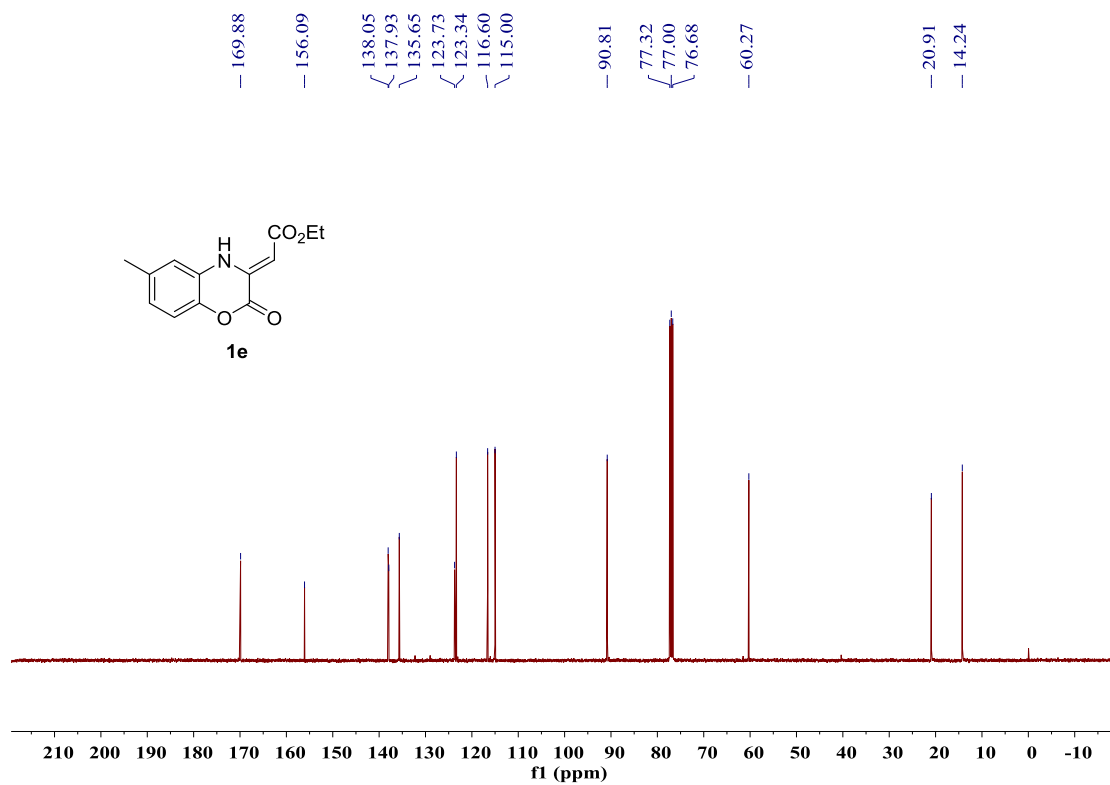

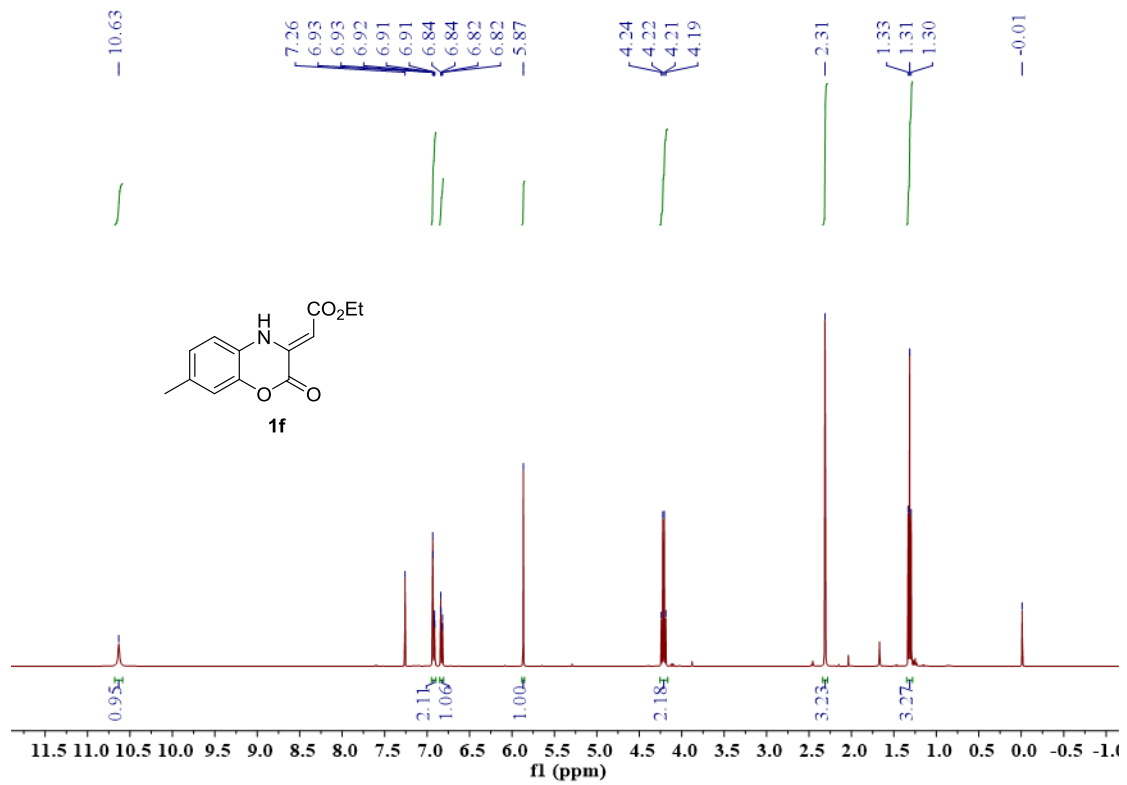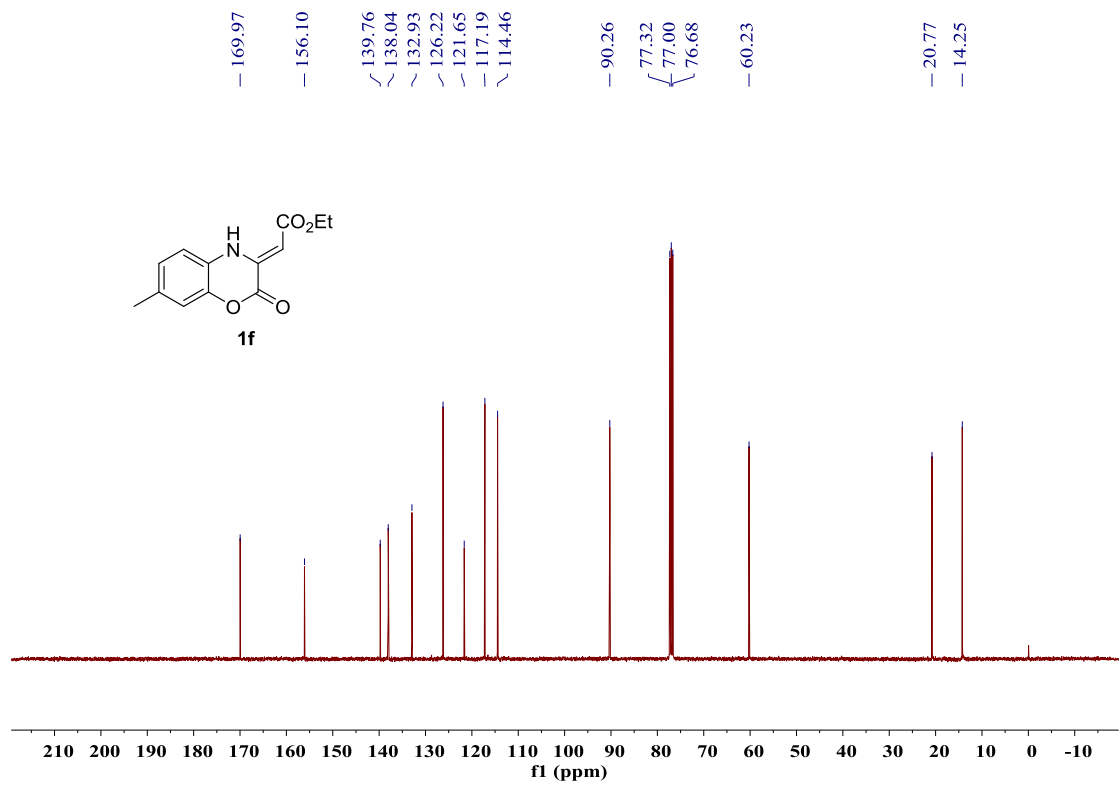

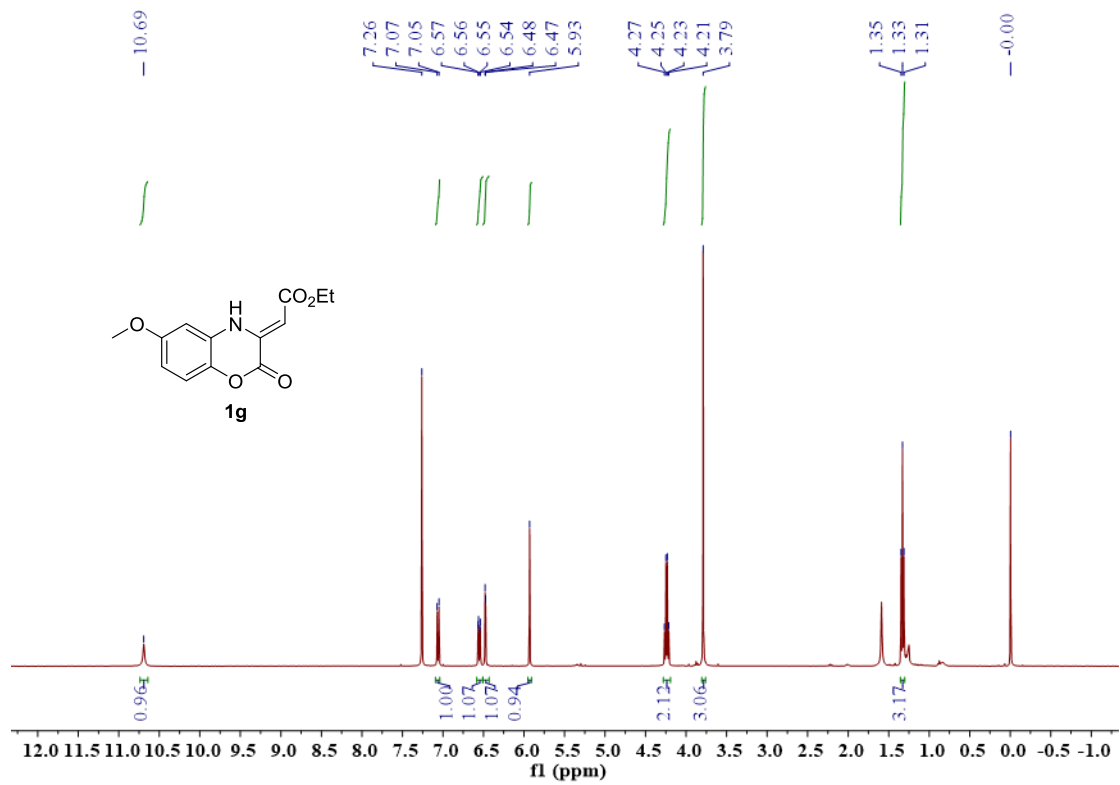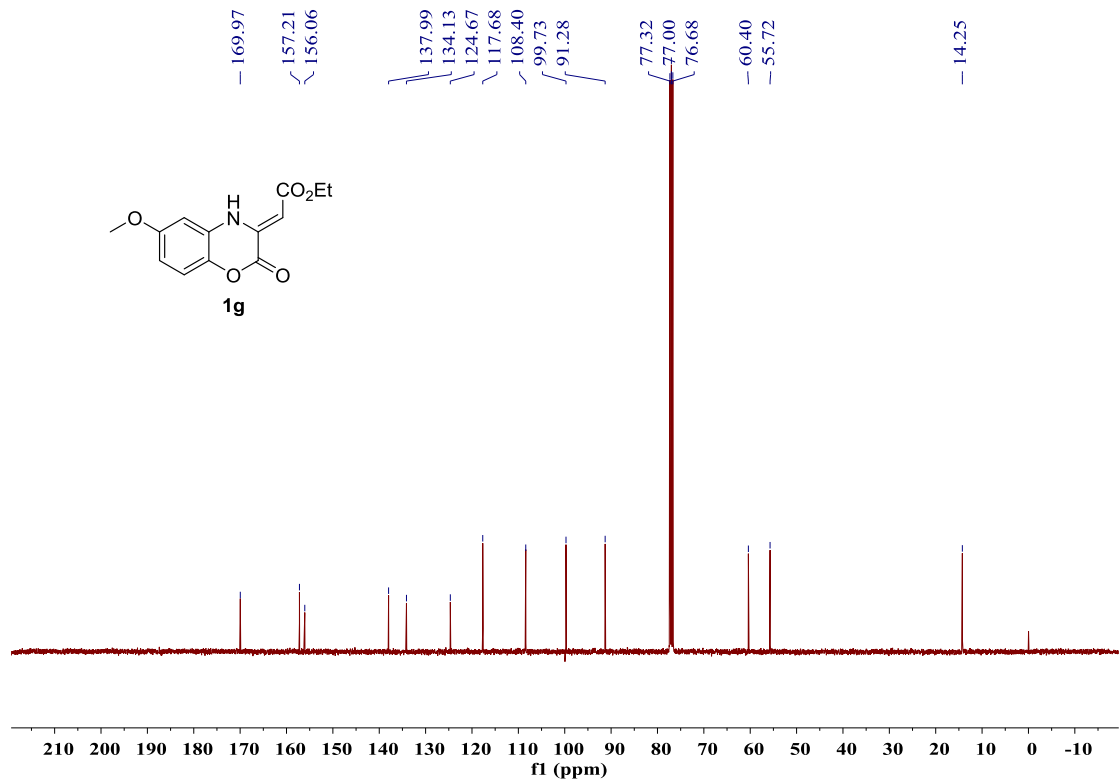

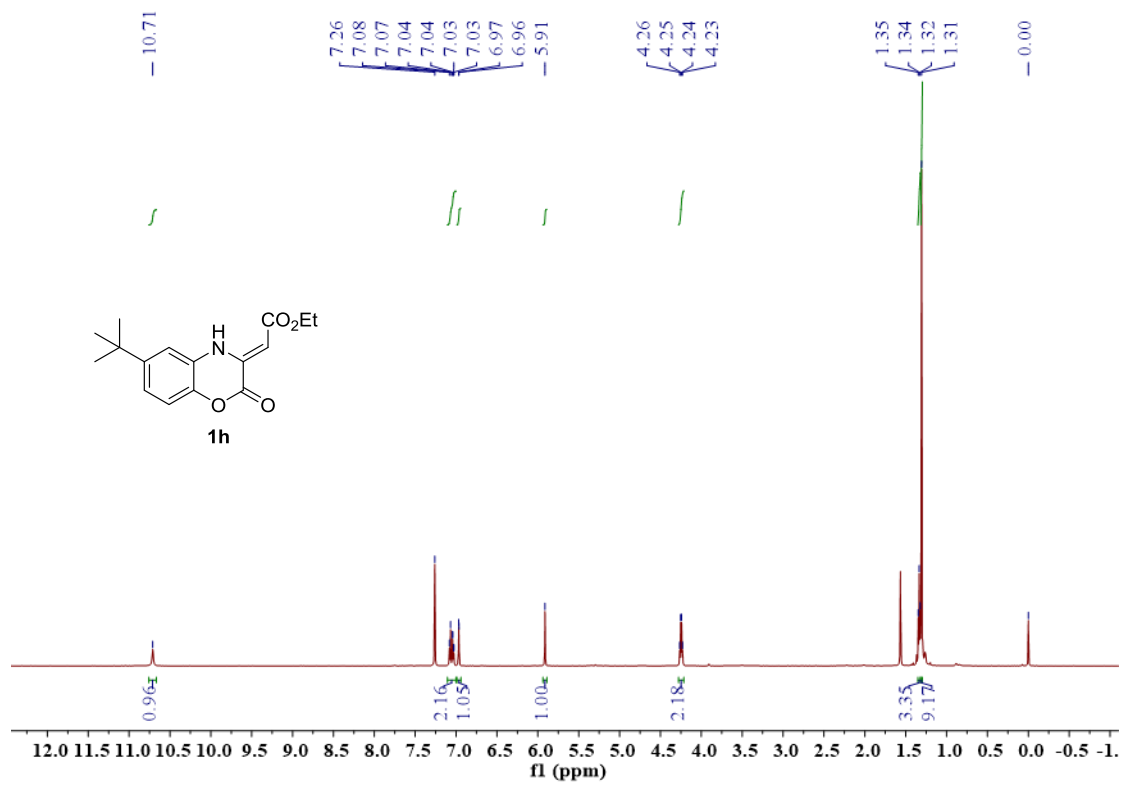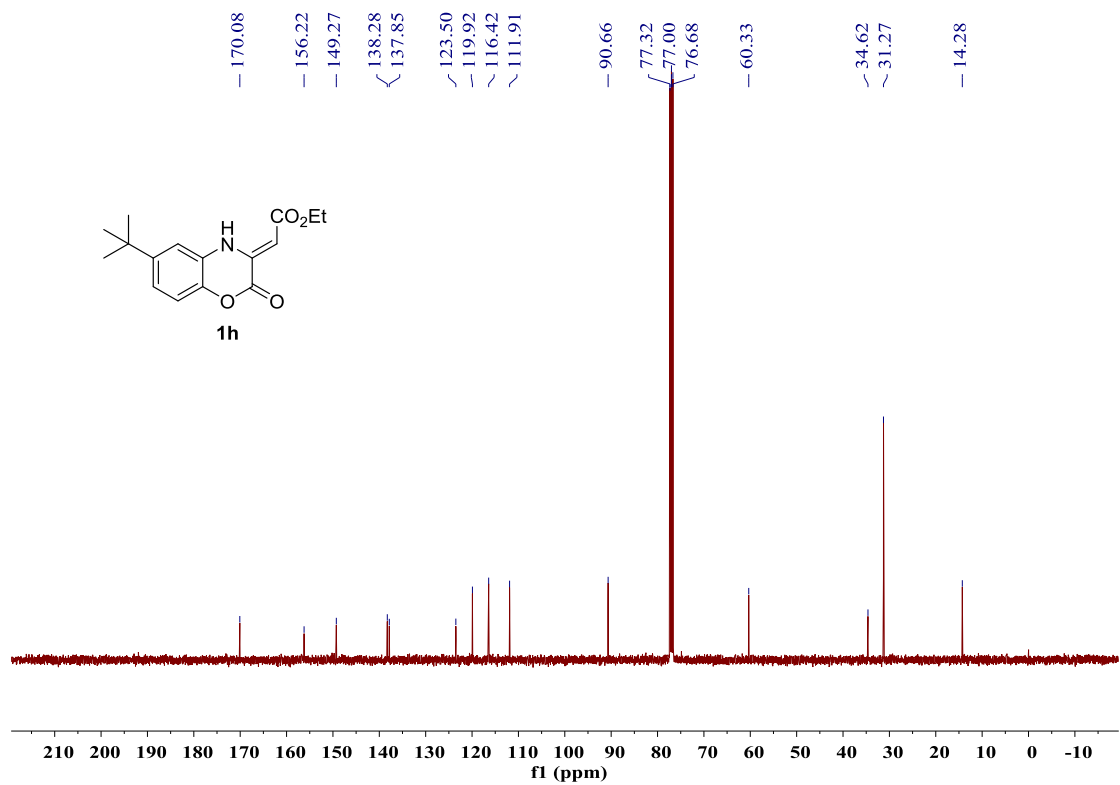

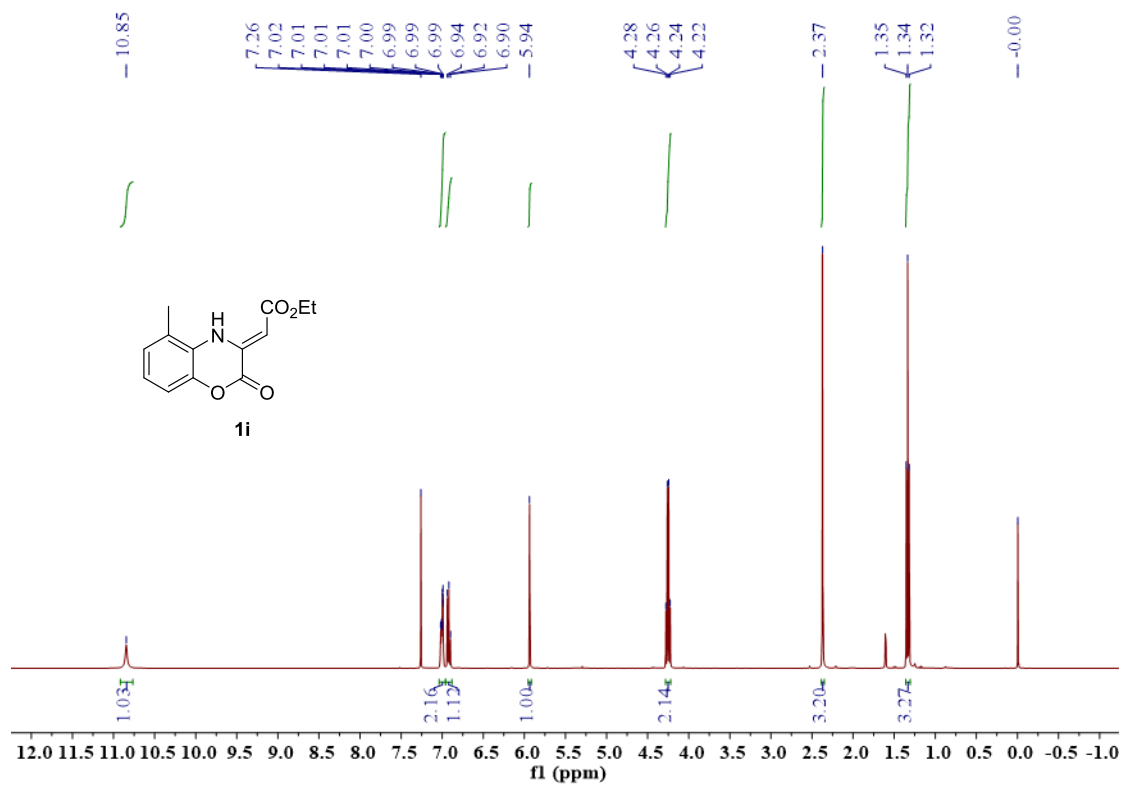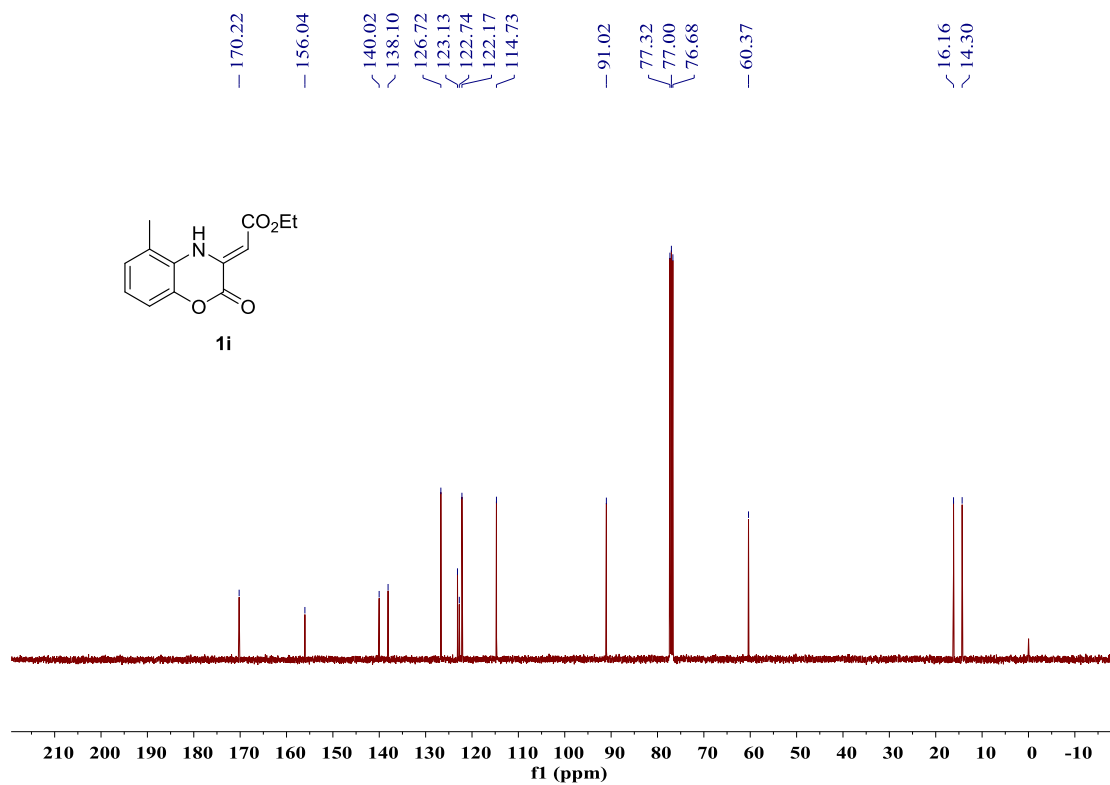

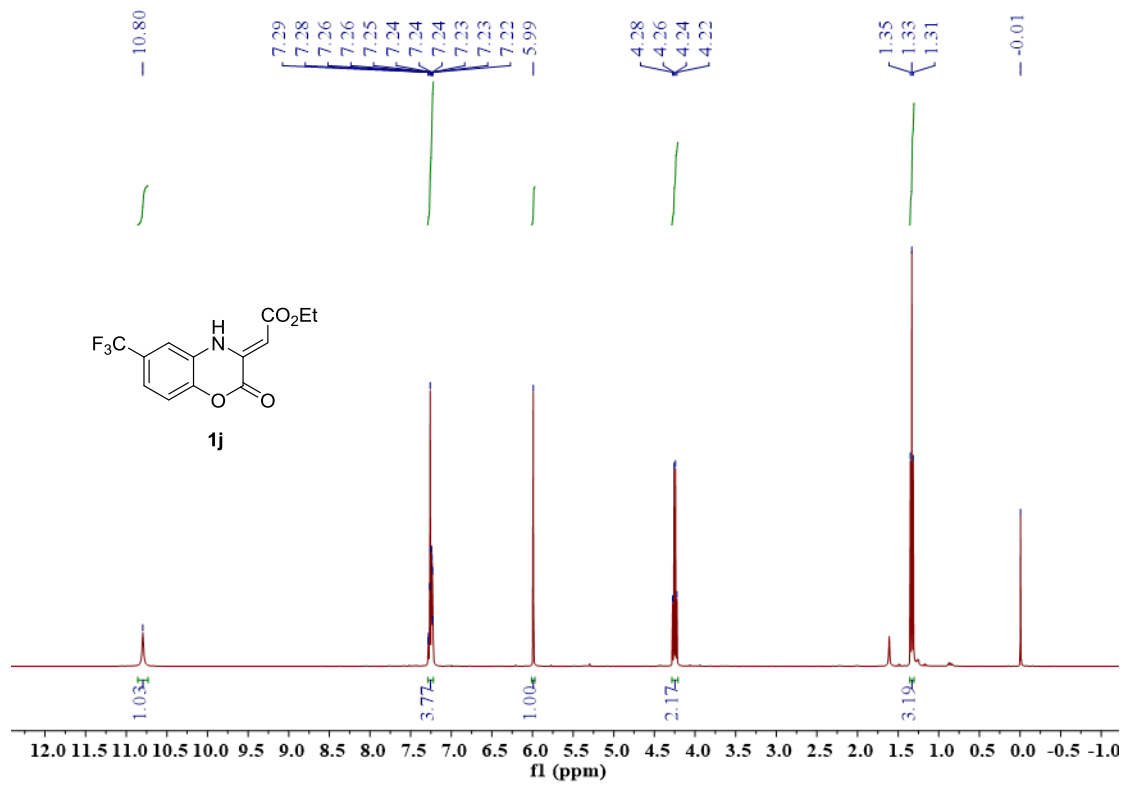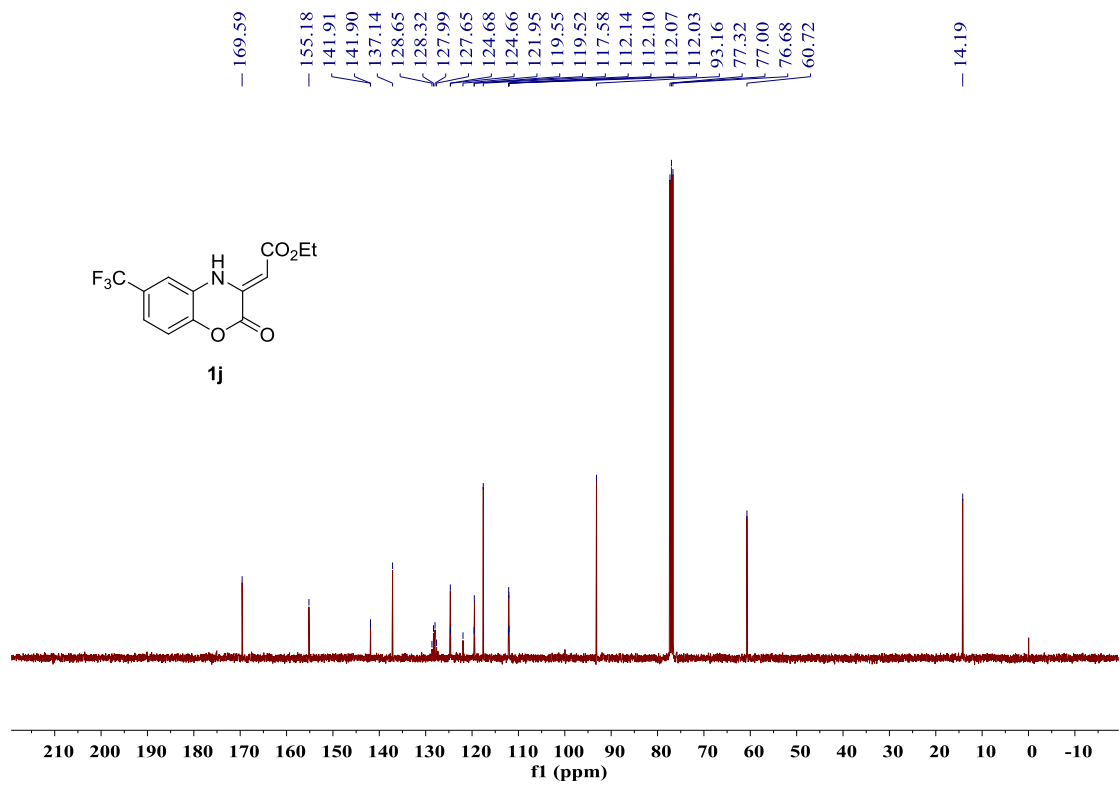

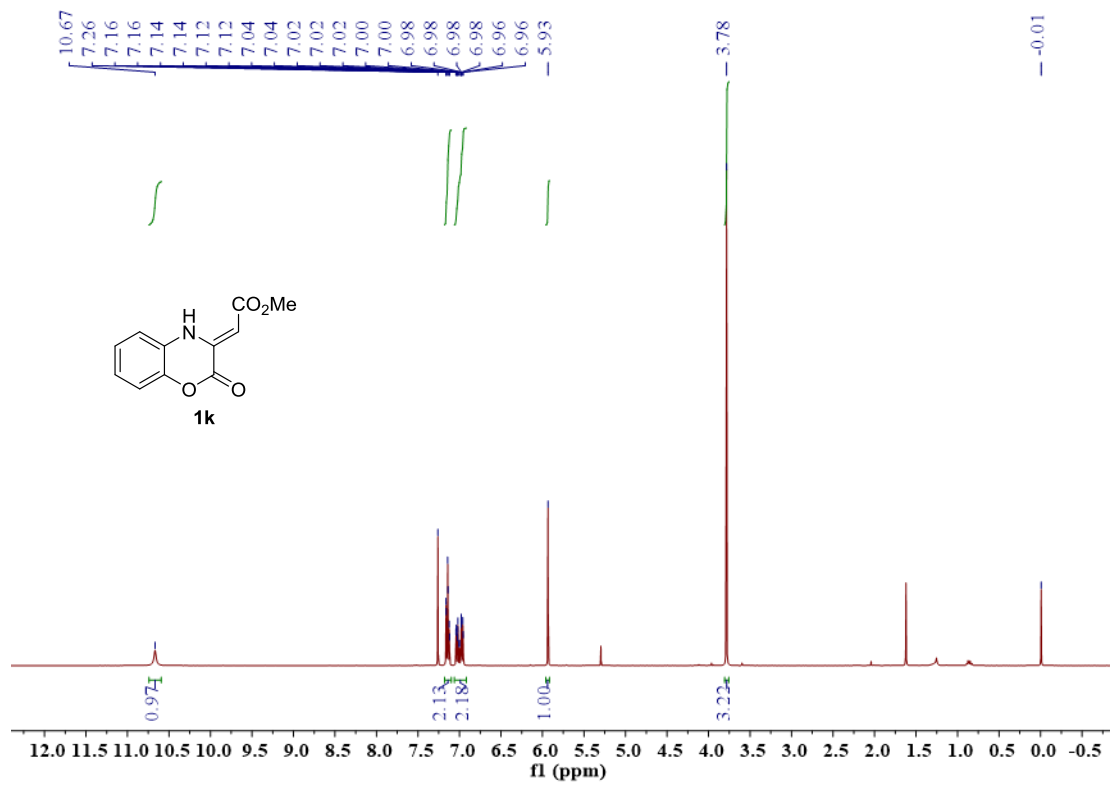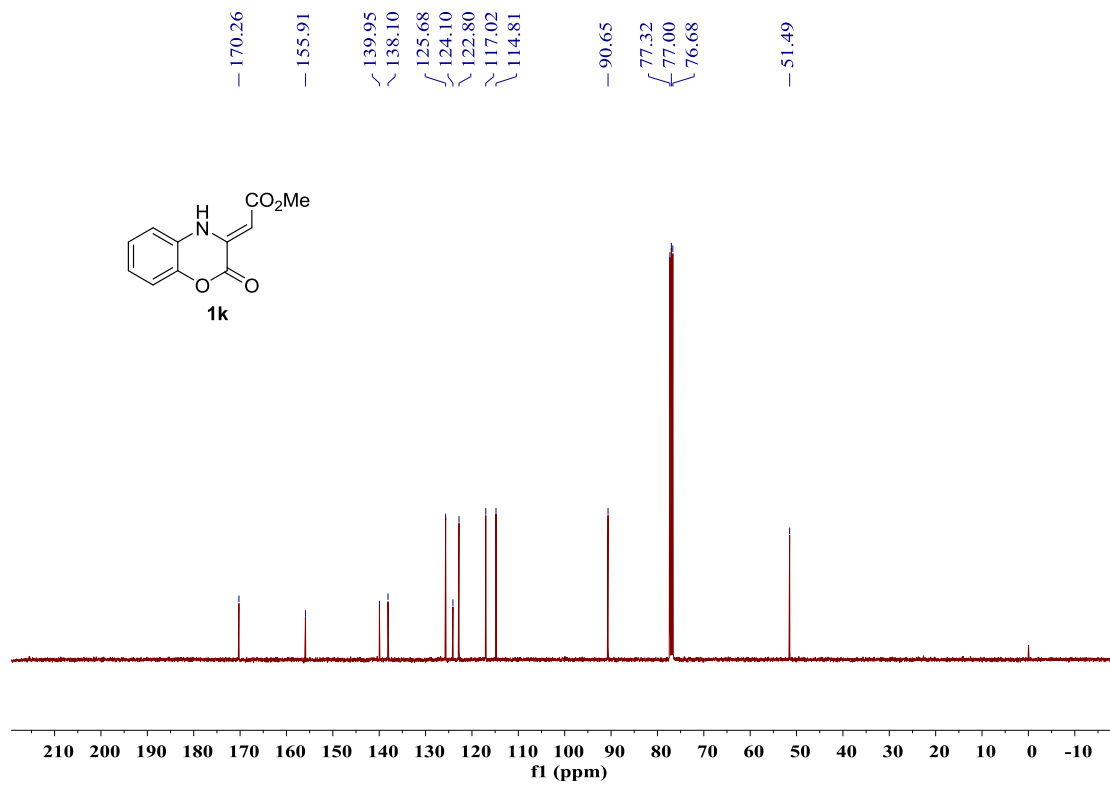



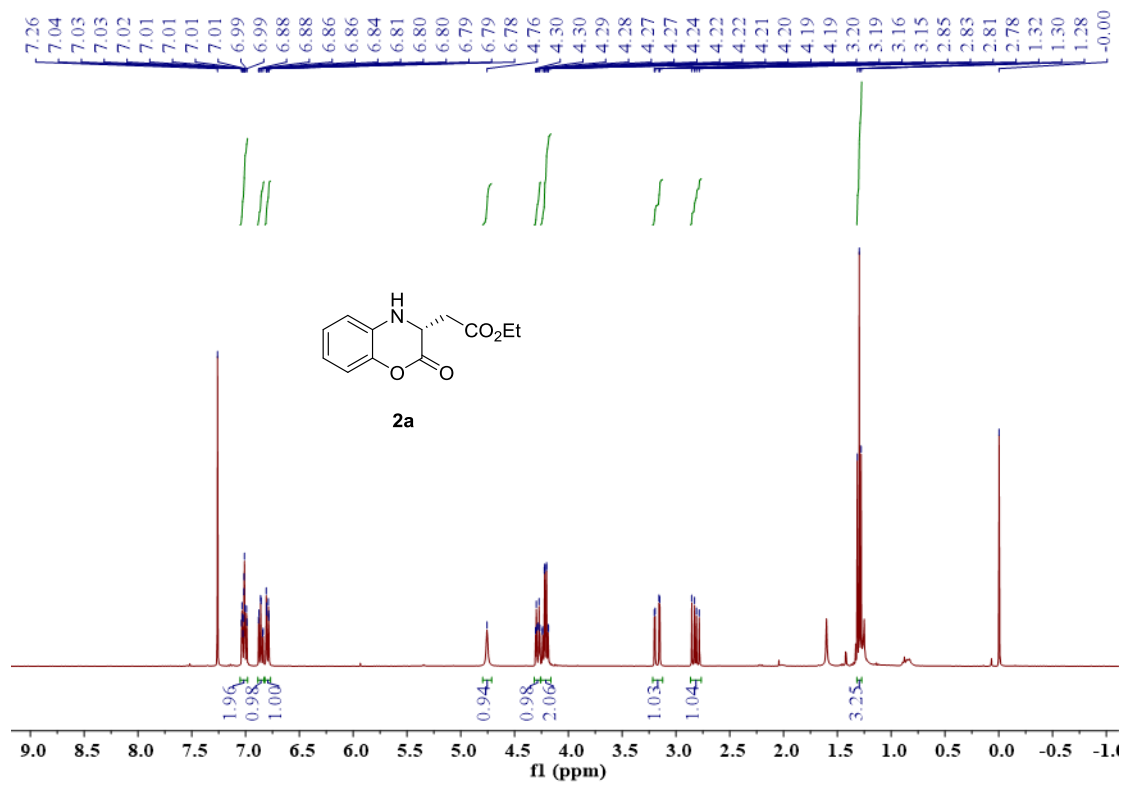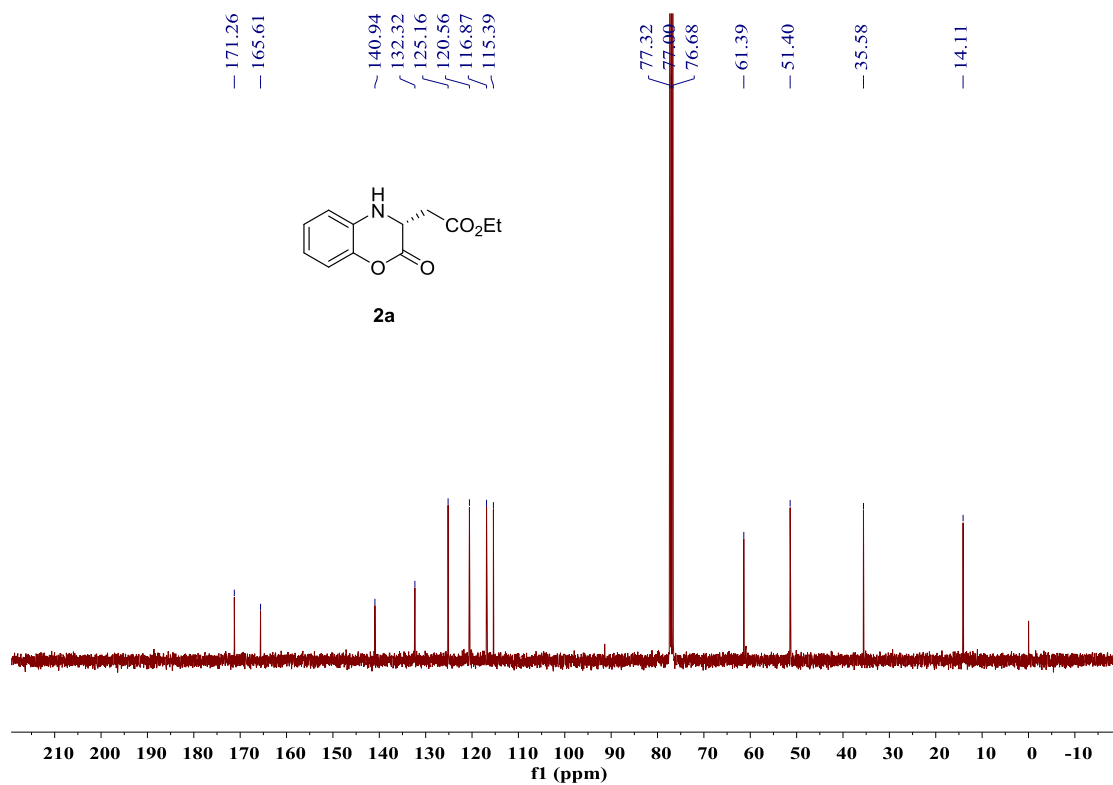

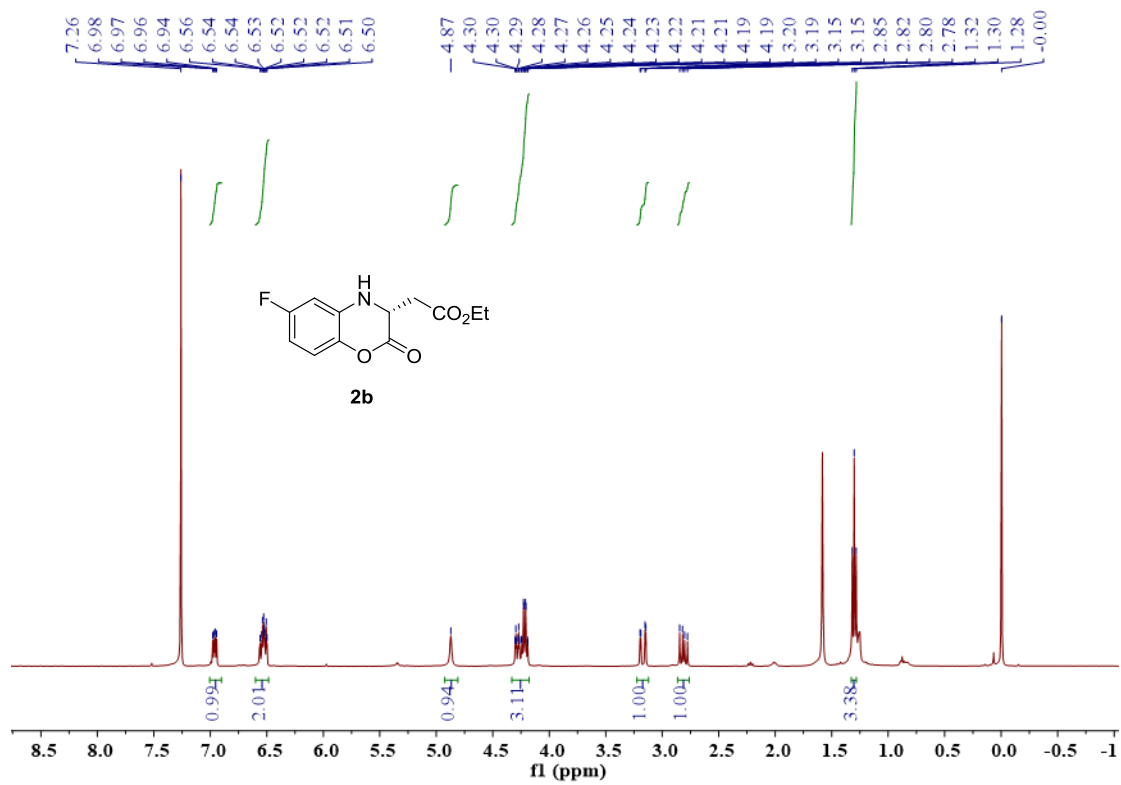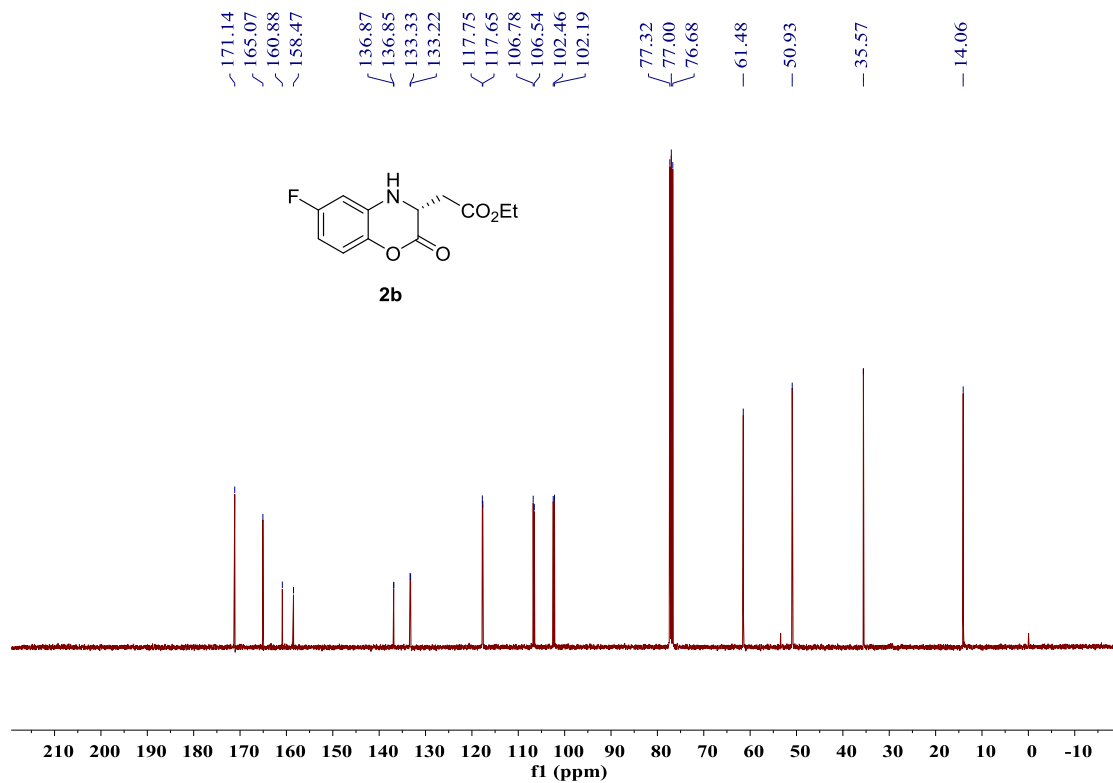

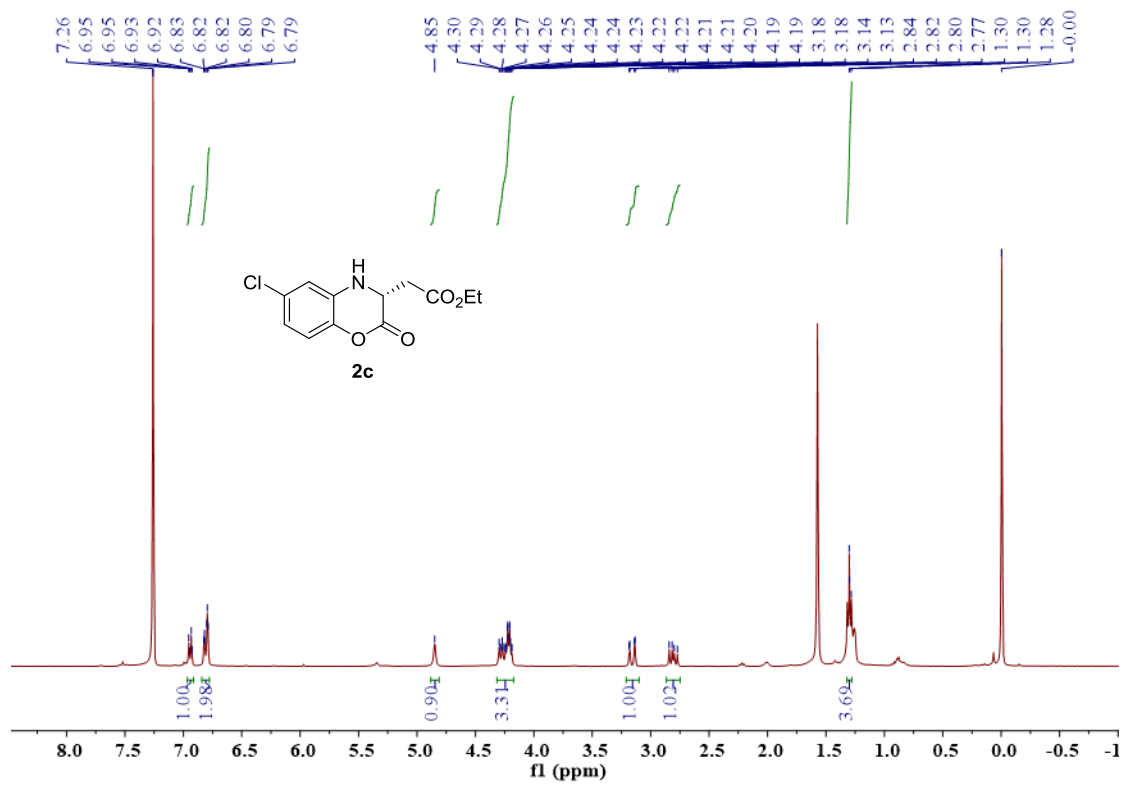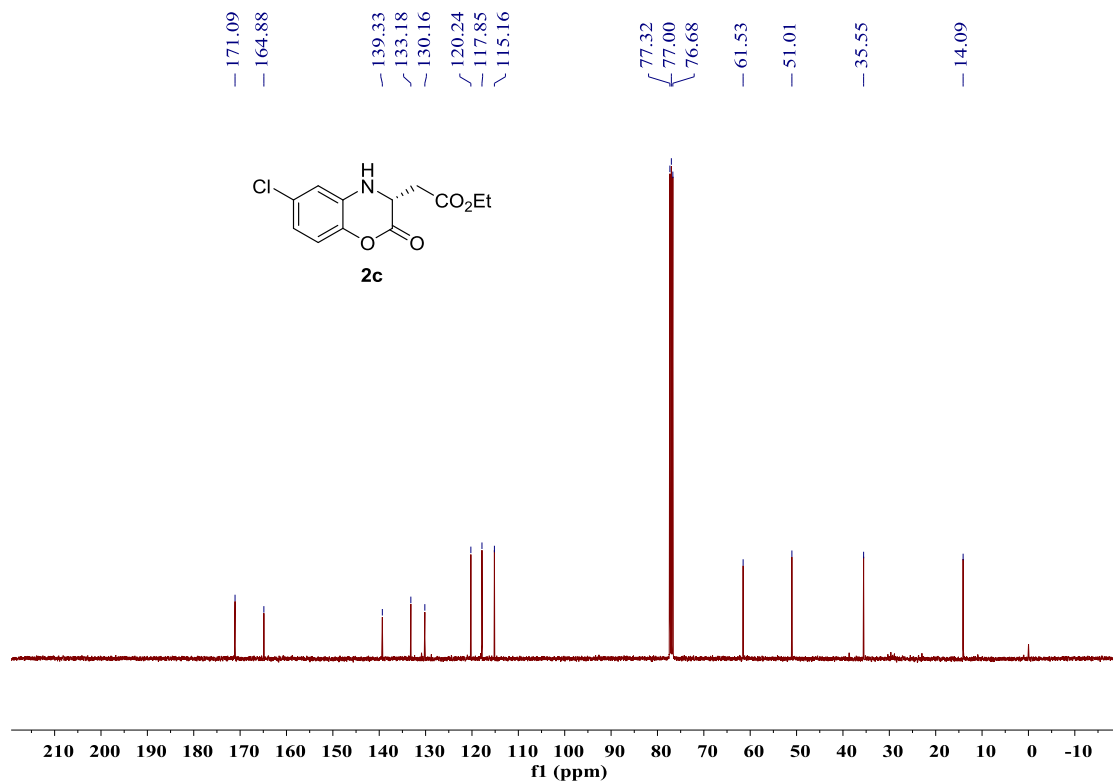

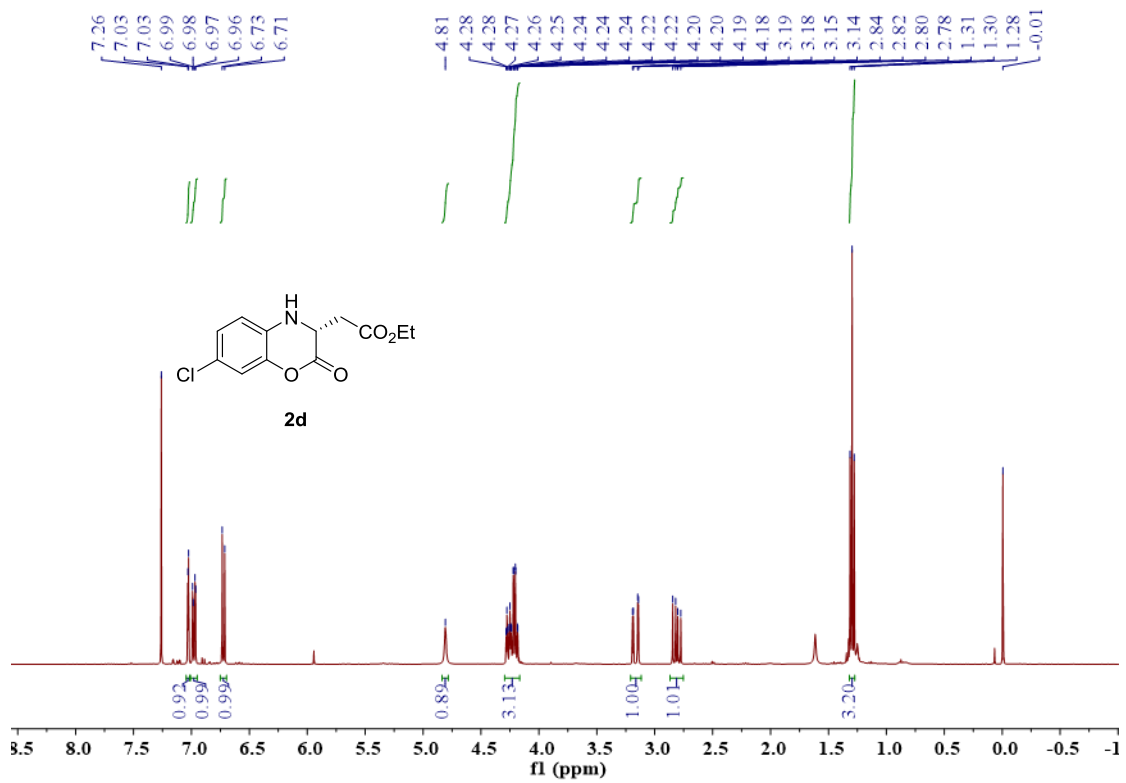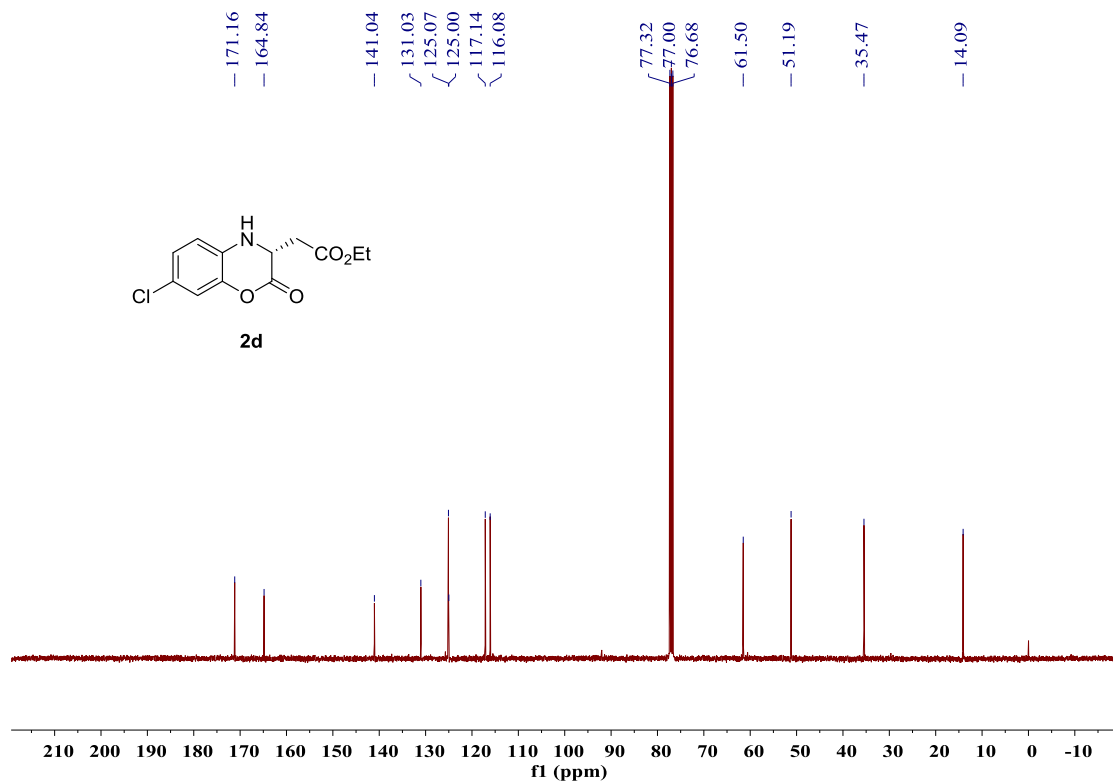

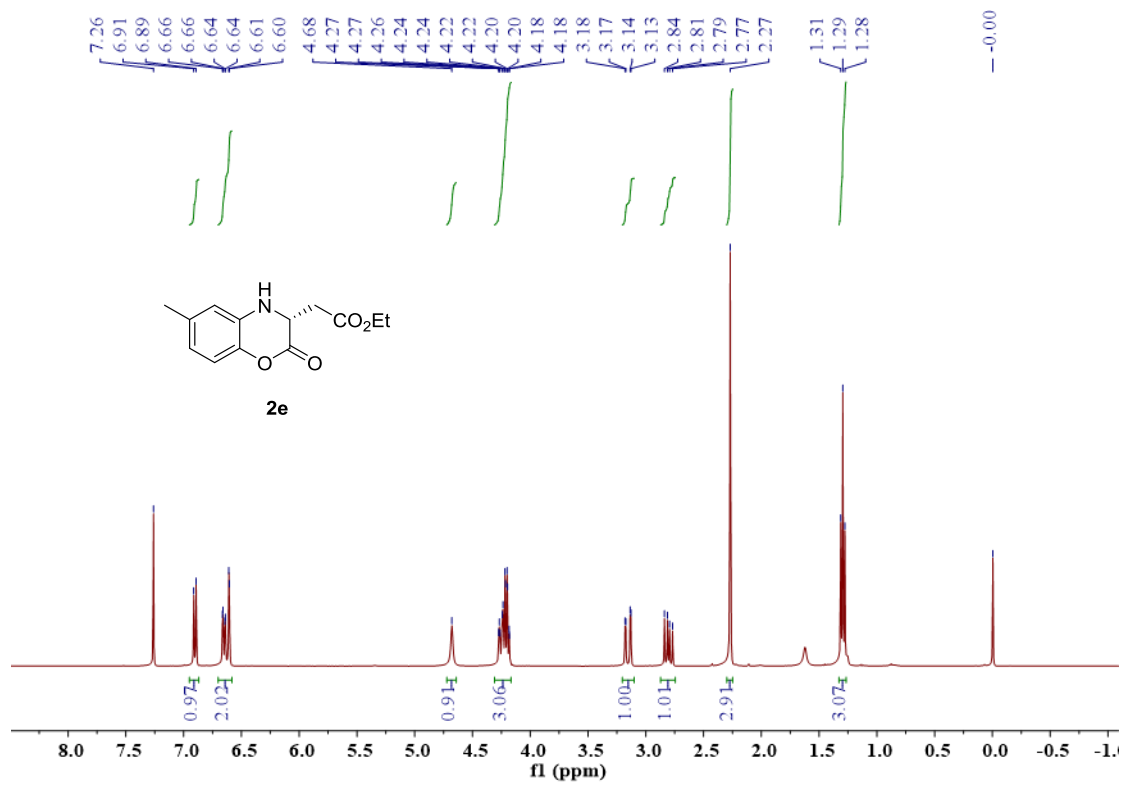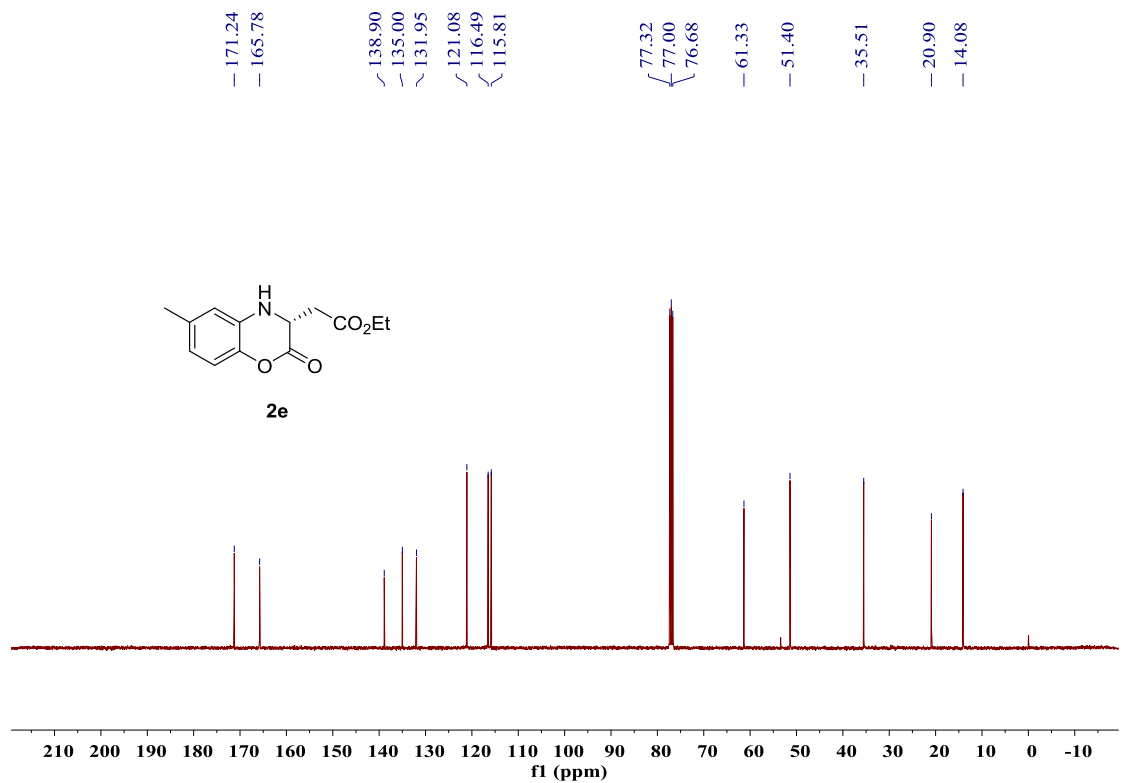

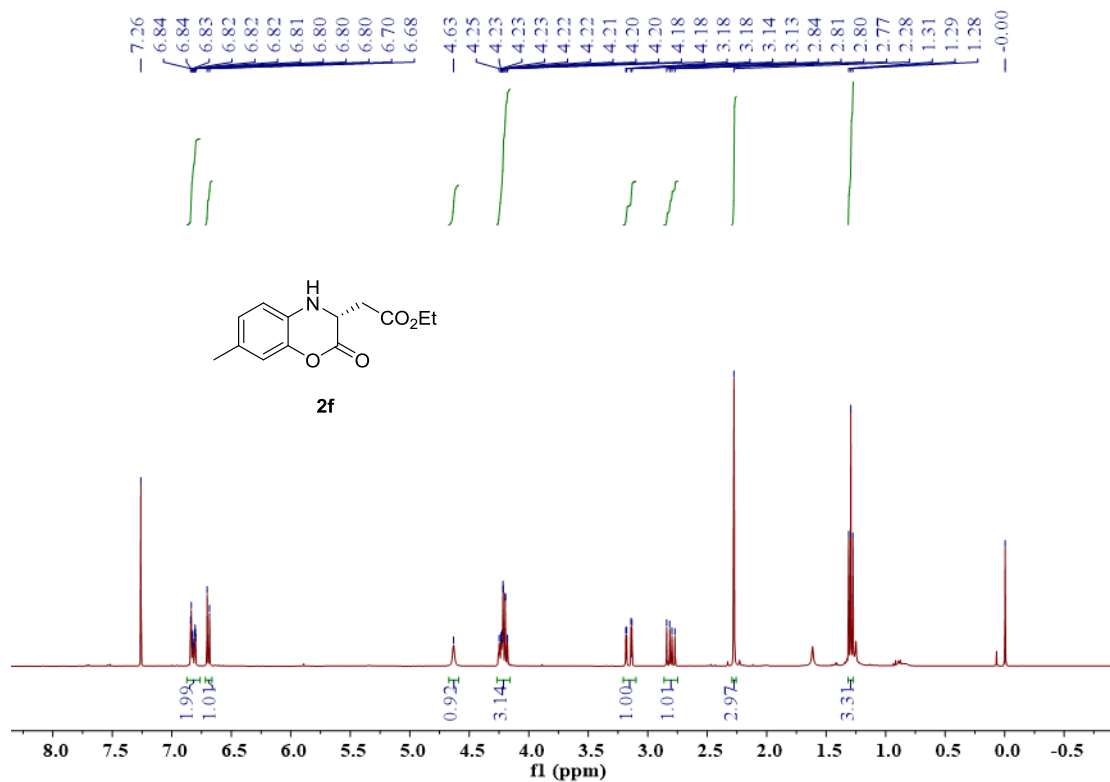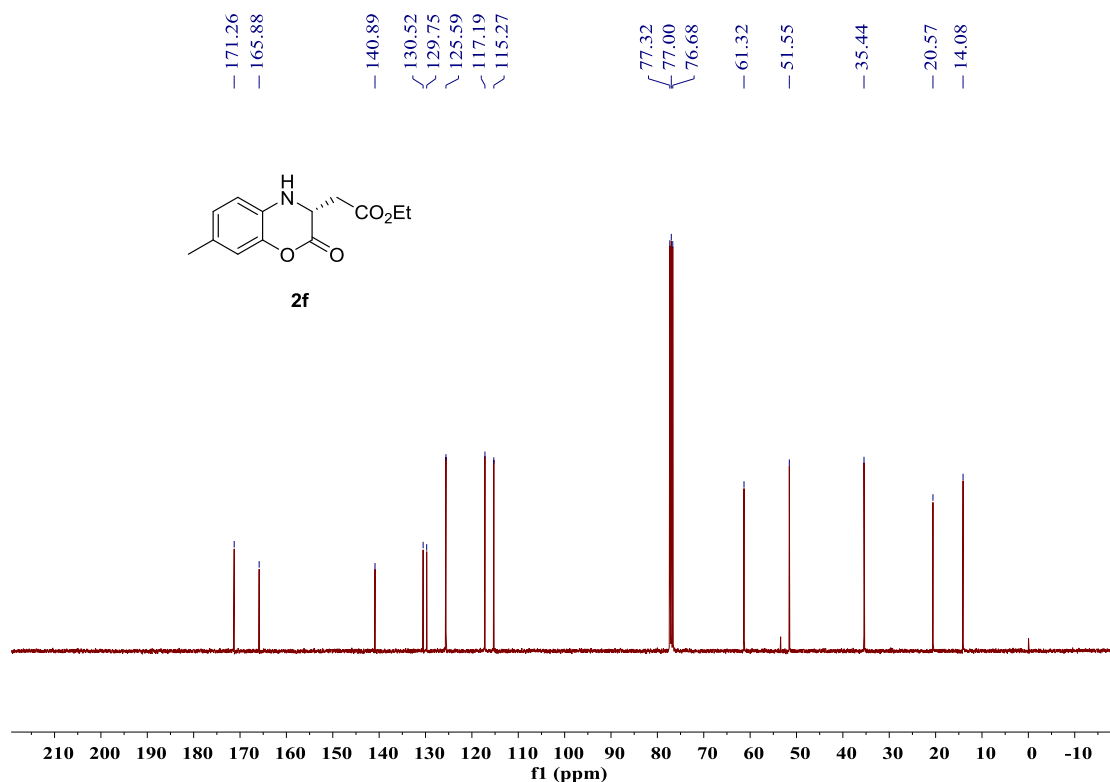

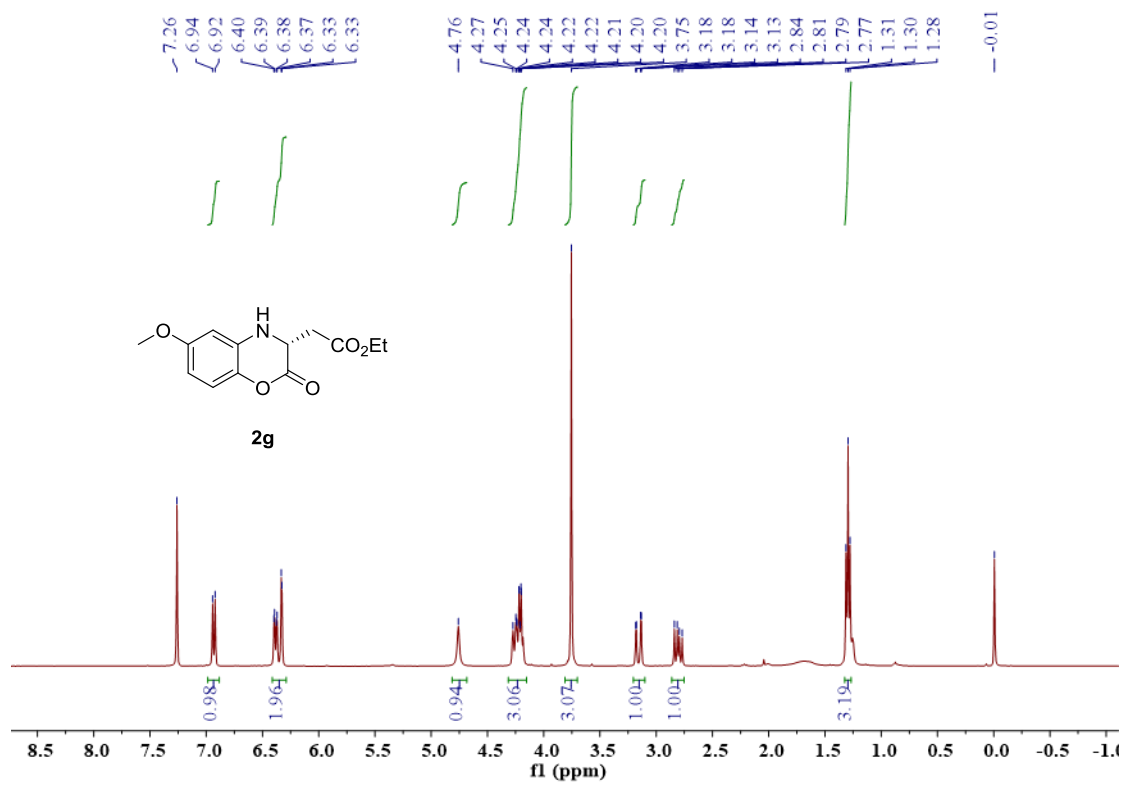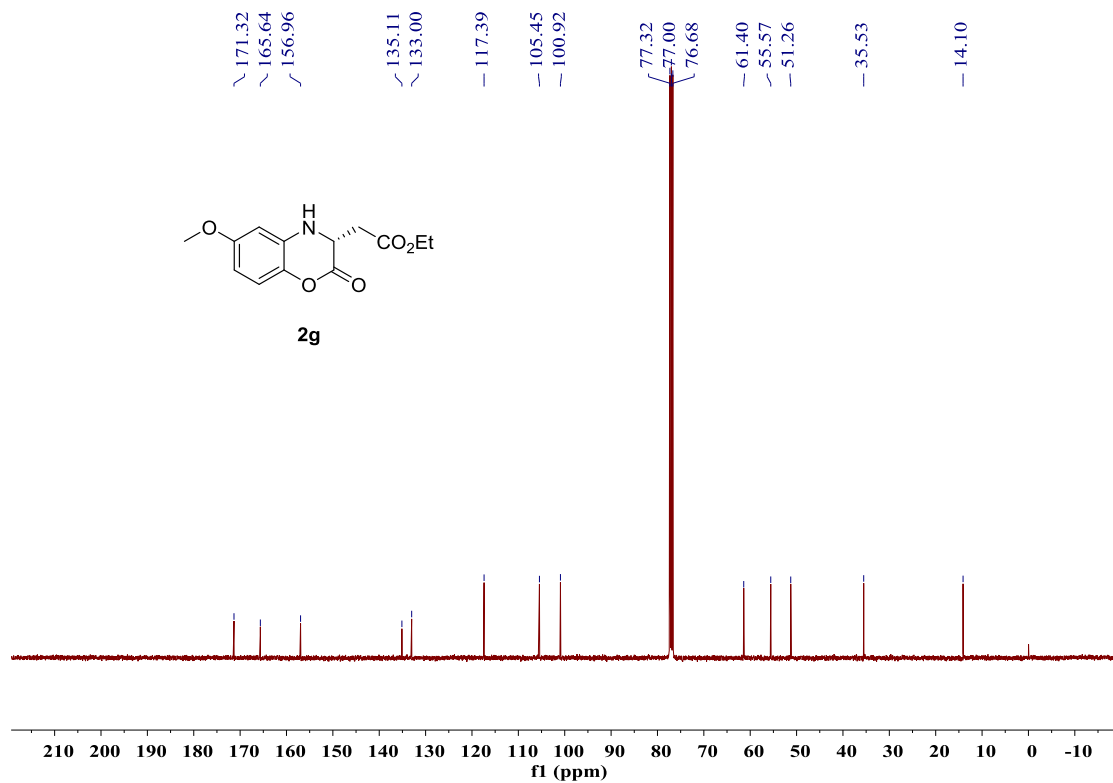

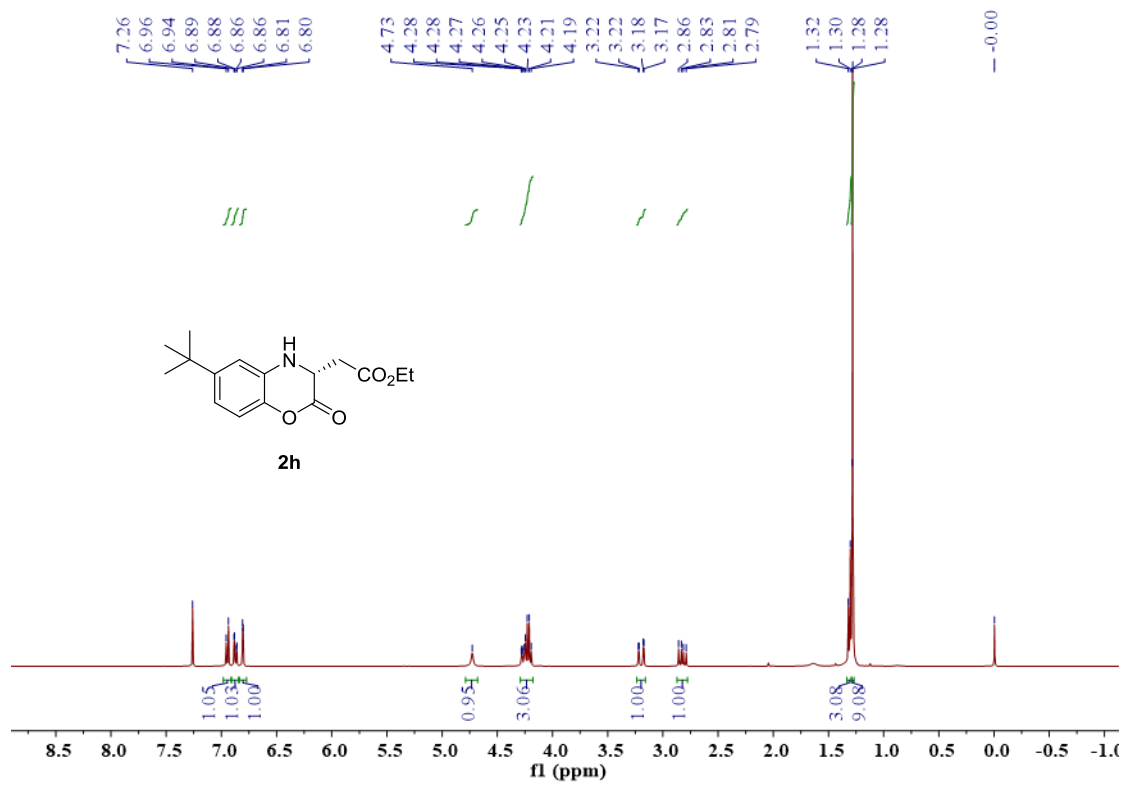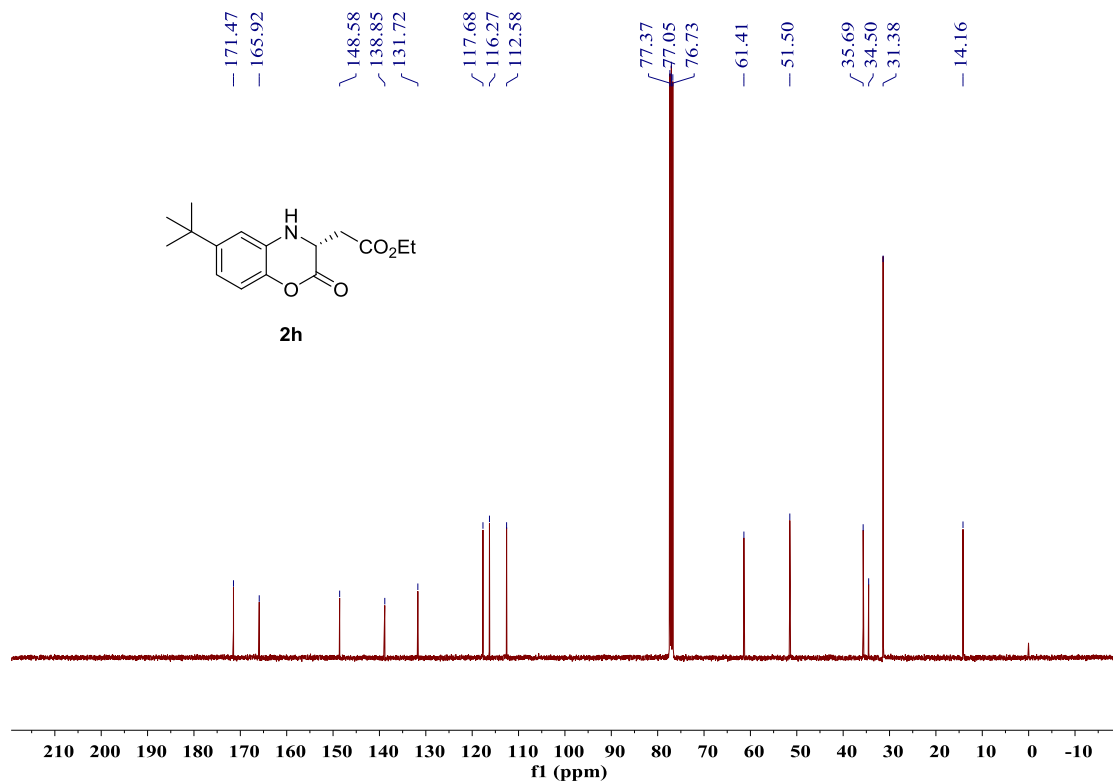



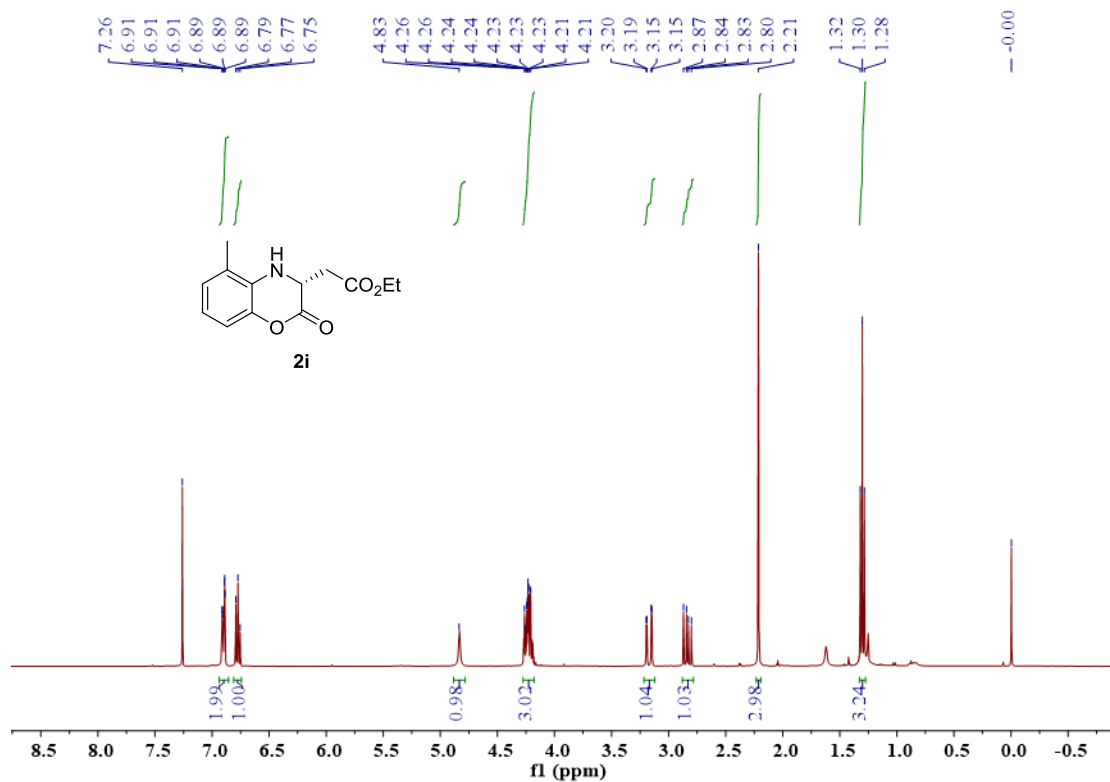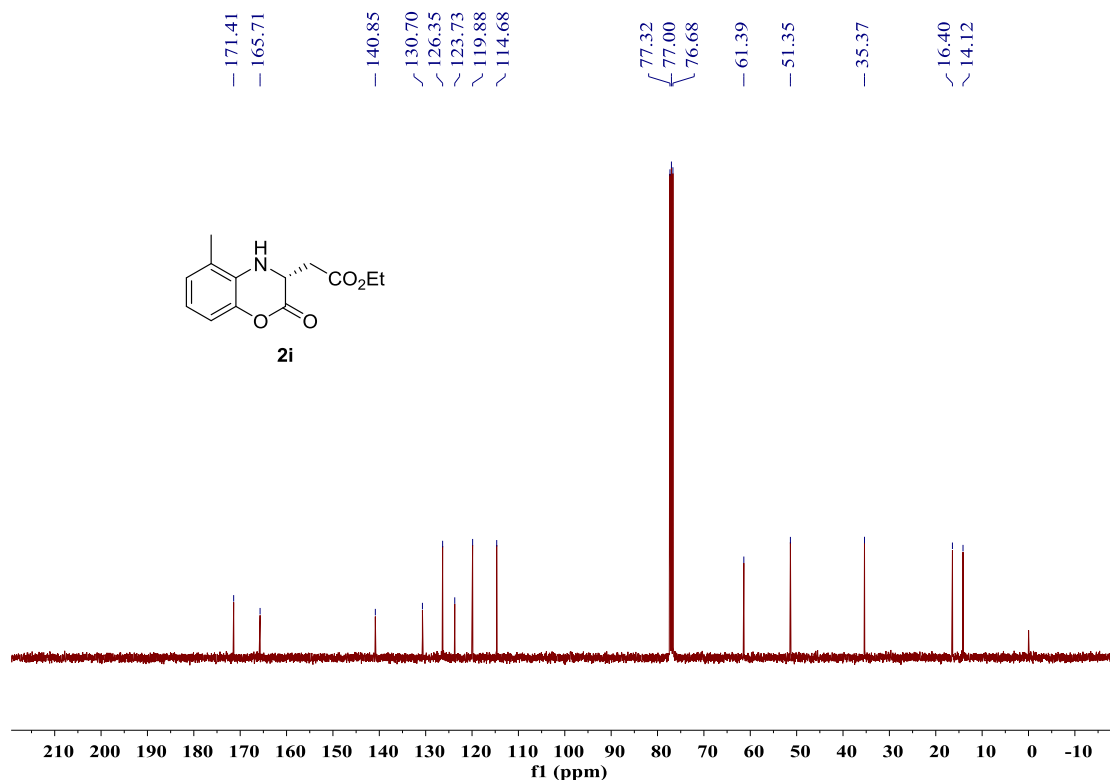

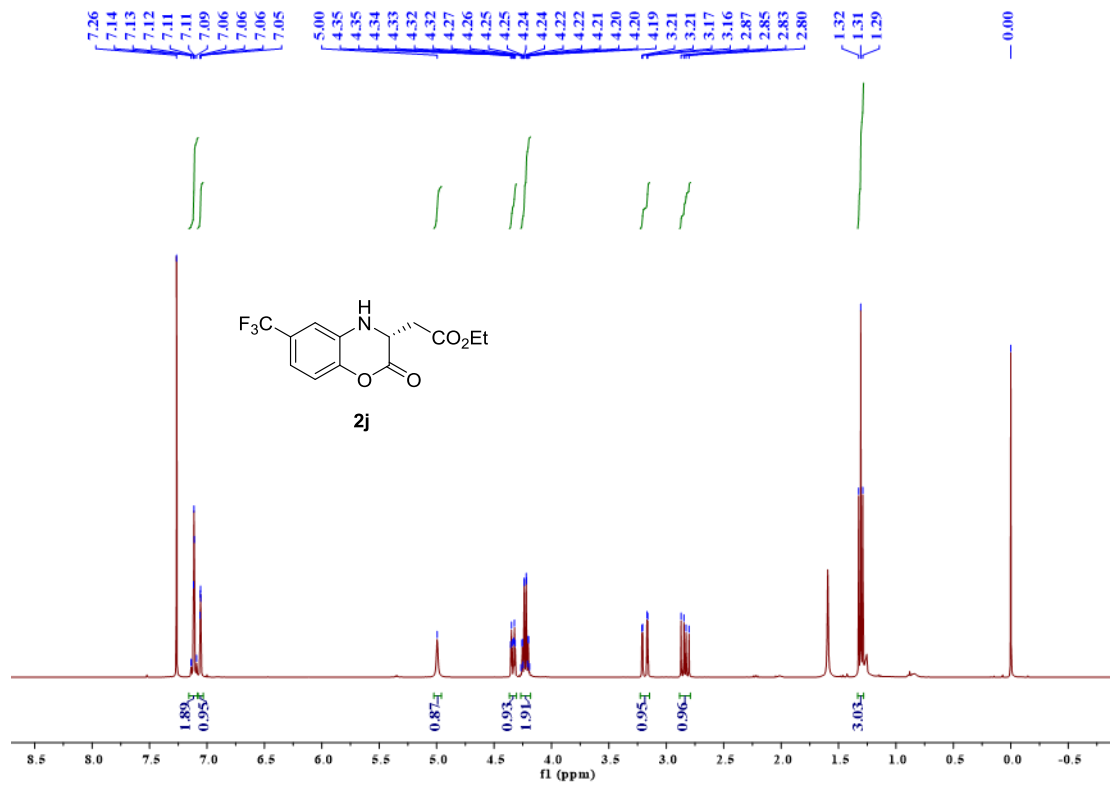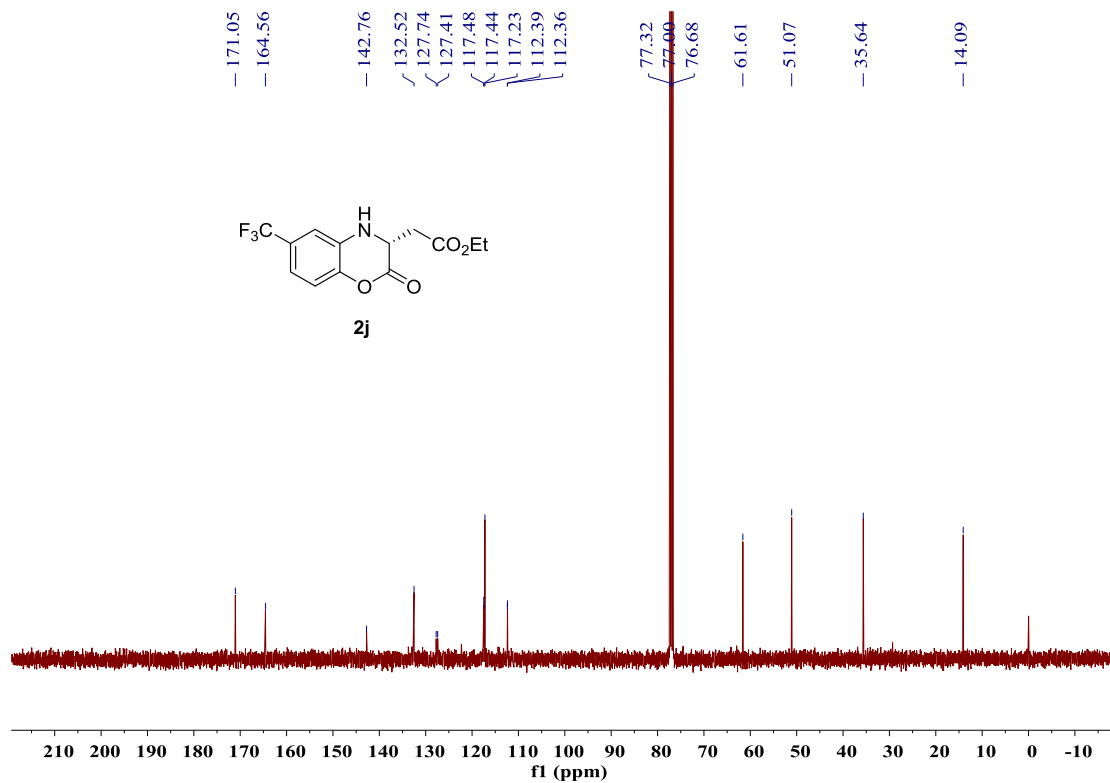

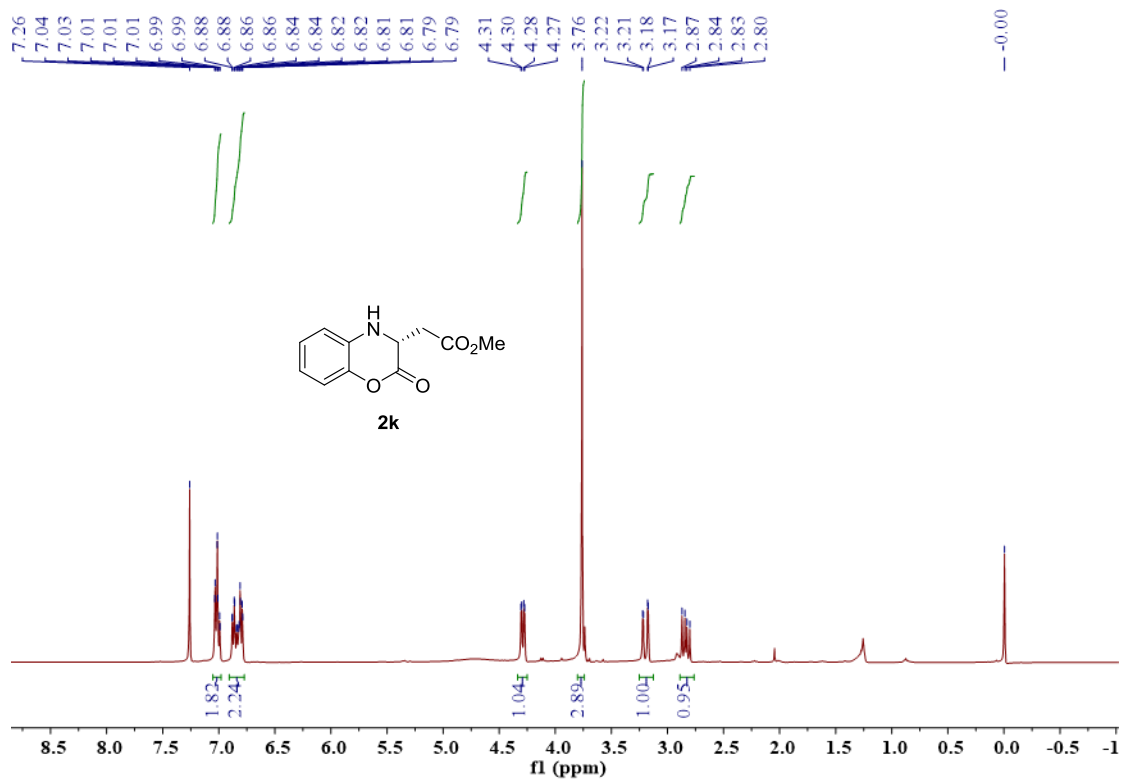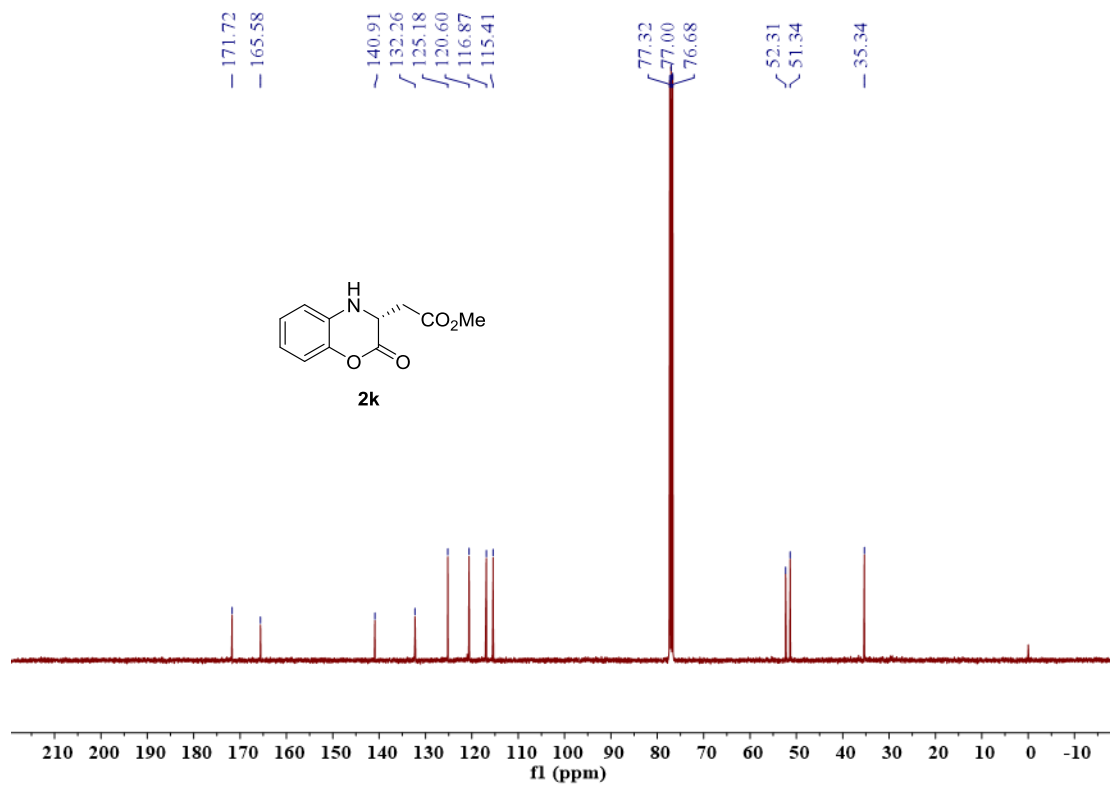

## VI. HPLC spectra

Data File E:\DATA\YXG\YXG-893\YXG-893 2018-03-04 10-50-07\021-0201.D  
 Sample Name: CZY-RACE

```

=====
Acq. Operator   : SYSTEM                      Seq. Line :    2
Acq. Instrument : 1260HPLC-DAD                Location  : Vial 21
Injection Date  : 3/4/2018 11:04:24 AM        Inj       :    1
                                           Inj Volume: 3.000 µl

Acq. Method     : E:\DATA\YXG\YXG-893\YXG-893 2018-03-04 10-50-07\DAD-OD(1-2)-95-5-1ML-3UL-
                210NM-40MIN.M
Last changed    : 3/4/2018 10:50:08 AM by SYSTEM
Analysis Method : E:\DATA\YXG\YXG-893\YXG-893 2018-03-04 10-50-07\DAD-OD(1-2)-95-5-1ML-3UL-
                210NM-40MIN.M (Sequence Method)
Last changed    : 11/27/2018 9:33:33 PM by SYSTEM
                (modified after loading)
Additional Info : Peak(s) manually integrated
  
```

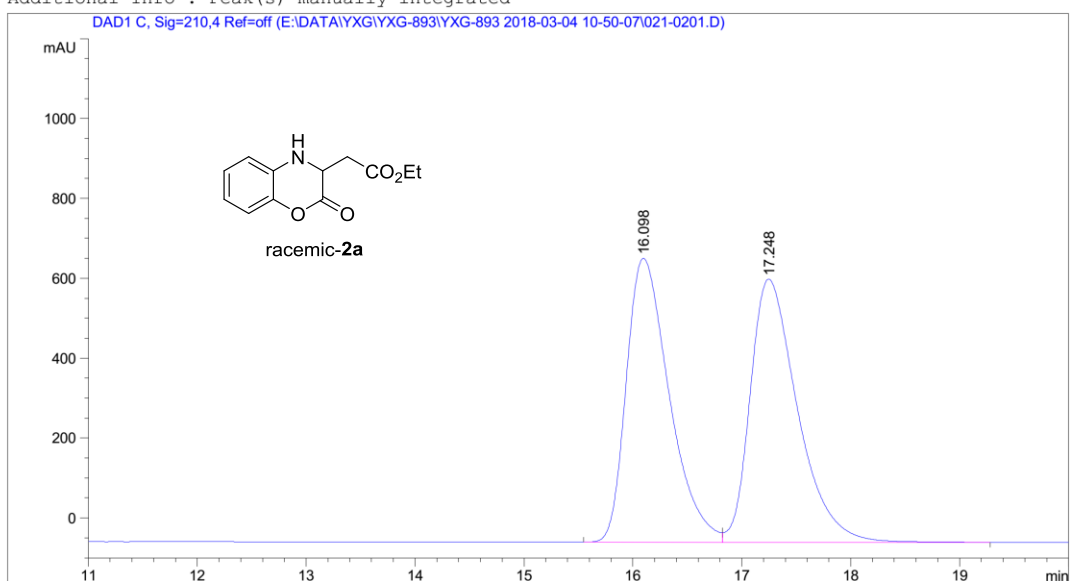

### Area Percent Report

```

Sorted By      : Signal
Multiplier     : 1.0000
Dilution       : 1.0000
Do not use Multiplier & Dilution Factor with ISTDs
  
```

Signal 1: DAD1 C, Sig=210,4 Ref=off

| Peak # | RetTime [min] | Type | Width [min] | Area [mAU*s] | Height [mAU] | Area %  |
|--------|---------------|------|-------------|--------------|--------------|---------|
| 1      | 16.098        | BV   | 0.4189      | 1.94251e4    | 710.70105    | 49.4433 |
| 2      | 17.248        | VB   | 0.4558      | 1.98626e4    | 658.70929    | 50.5567 |

Totals : 3.92877e4 1369.41034

Data File E:\DATA\YXG\YXG-931\CZY-REPEAT 2018-05-20 15-57-00\002-0201.D  
Sample Name: CZY-0519-96

```
=====
Acq. Operator   : SYSTEM                               Seq. Line :    2
Acq. Instrument : 1260HPLC-DAD                        Location  : Vial 2
Injection Date  : 5/20/2018 4:10:00 PM                Inj       :    1
                                                    Inj Volume: 2.000 µl
Acq. Method     : E:\DATA\YXG\YXG-931\CZY-REPEAT 2018-05-20 15-57-00\DAD-OD(1-2)-95-5-1ML-
                2UL-ALL-25MIN.M
Last changed    : 5/20/2018 3:57:00 PM by SYSTEM
Analysis Method : E:\DATA\YXG\YXG-931\CZY-REPEAT 2018-05-20 15-57-00\DAD-OD(1-2)-95-5-1ML-
                2UL-ALL-25MIN.M (Sequence Method)
Last changed    : 11/27/2018 5:51:52 PM by SYSTEM
                (modified after loading)
Additional Info : Peak(s) manually integrated
=====
```

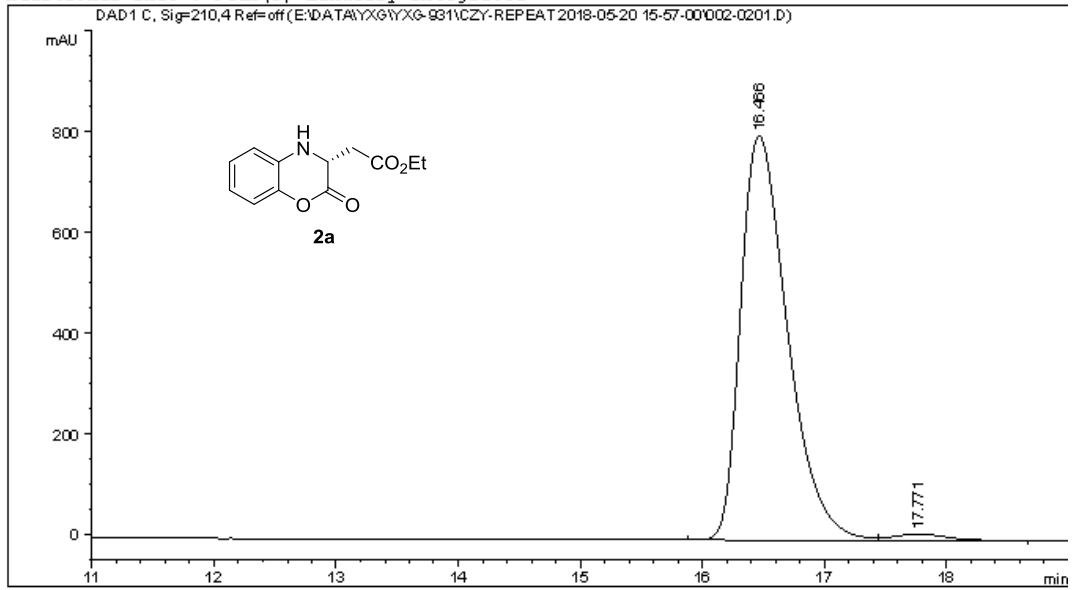

=====  
Area Percent Report  
=====

Sorted By : Signal  
Multiplier : 1.0000  
Dilution : 1.0000  
Do not use Multiplier & Dilution Factor with ISTDs

Signal 1: DAD1 C, Sig=210,4 Ref=off

| Peak # | RetTime [min] | Type | Width [min] | Area [mAU*s] | Height [mAU] | Area %  |
|--------|---------------|------|-------------|--------------|--------------|---------|
| 1      | 16.466        | BV   | 0.4091      | 2.14374e4    | 804.00061    | 98.2343 |
| 2      | 17.771        | VB   | 0.3616      | 385.32266    | 13.23580     | 1.7657  |

Totals : 2.18227e4 817.23641

=====  
\*\*\* End of Report \*\*\*

Data File E:\DATA\YXG\CZY-4-F-RACE\CZY-4-F-RACE 2018-03-28 16-34-41\021-0201.D  
 Sample Name: CZY-4-F-RACE

```

=====
Acq. Operator   : SYSTEM                      Seq. Line :    2
Acq. Instrument : 1260HPLC-DAD                Location  : Vial 21
Injection Date  : 3/28/2018 4:47:56 PM       Inj       :    1
                                           Inj Volume: 5.000 µl
Acq. Method     : E:\DATA\YXG\CZY-4-F-RACE\CZY-4-F-RACE 2018-03-28 16-34-41\DAD-OD (1-2)-97
                                           -3-0.5ML-5UL-210NM-70MIN.M
Last changed    : 3/28/2018 5:54:42 PM by SYSTEM
                                           (modified after loading)
Analysis Method : E:\DATA\YXG\CZY-4-F-RACE\CZY-4-F-RACE 2018-03-28 16-34-41\DAD-OD (1-2)-97
                                           -3-0.5ML-5UL-210NM-70MIN.M (Sequence Method)
Last changed    : 11/27/2018 9:27:11 PM by SYSTEM
                                           (modified after loading)
Additional Info : Peak(s) manually integrated
  
```

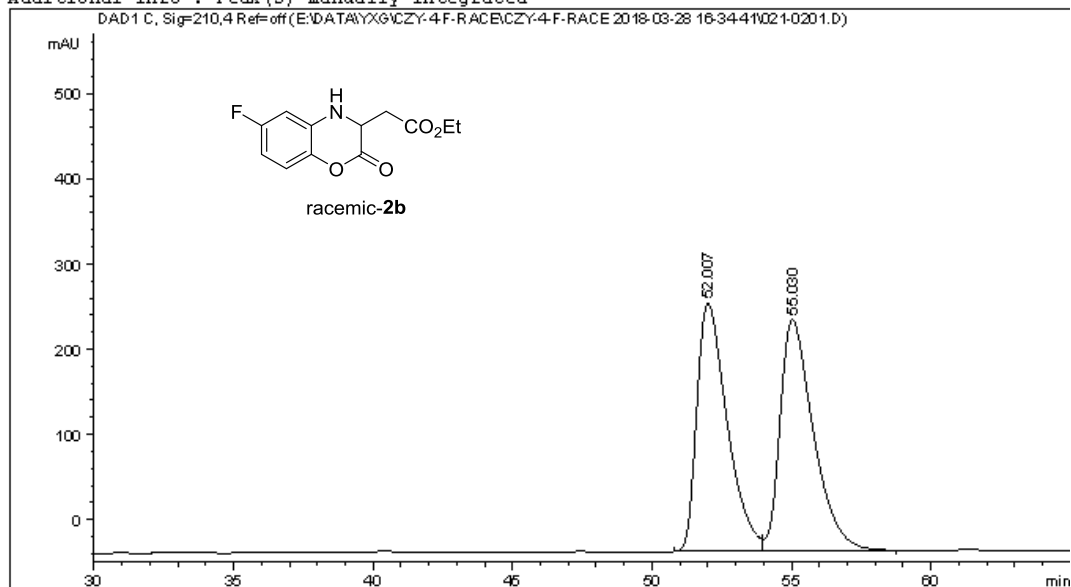

=====  
 Area Percent Report  
 =====

```

Sorted By      :      Signal
Multiplier     :      1.0000
Dilution       :      1.0000
Do not use Multiplier & Dilution Factor with ISTDs
  
```

Signal 1: DAD1 C, Sig=210,4 Ref=off

| Peak # | RetTime [min] | Type | Width [min] | Area [mAU*s] | Height [mAU] | Area %  |
|--------|---------------|------|-------------|--------------|--------------|---------|
| 1      | 52.007        | BV   | 1.0872      | 2.20450e4    | 291.20303    | 49.3849 |
| 2      | 55.030        | VB   | 1.1280      | 2.25942e4    | 271.20145    | 50.6151 |

Totals :                                    4.46392e4    562.40448

Data File D:\DATA\CZY\CZY-171\CZY-171 2018-11-10 15-11-04\042-0501.D  
Sample Name: CZY-171-2-4-F

```
=====
Acq. Operator   :                               Seq. Line :    5
Acq. Instrument : Instrument 2                   Location  : Vial 42
Injection Date  : 11/10/2018 4:27:51 PM         Inj       :    1
                                                    Inj Volume: 3.000 µl
Acq. Method     : D:\DATA\CZY\CZY-171\CZY-171 2018-11-10 15-11-04\DAD-OD(1-2)-97-3-0.5ML-3UL-
                  ALL-80MIN.M
Last changed    : 5/26/2018 2:44:22 PM
Analysis Method : D:\METHOD\LGY\DAD-0J(1-6)-95-5--LML-5UL-ALL-60MIN.M
Last changed    : 11/27/2018 8:45:36 PM
                  (modified after loading)
Additional Info : Peak(s) manually integrated
=====
```

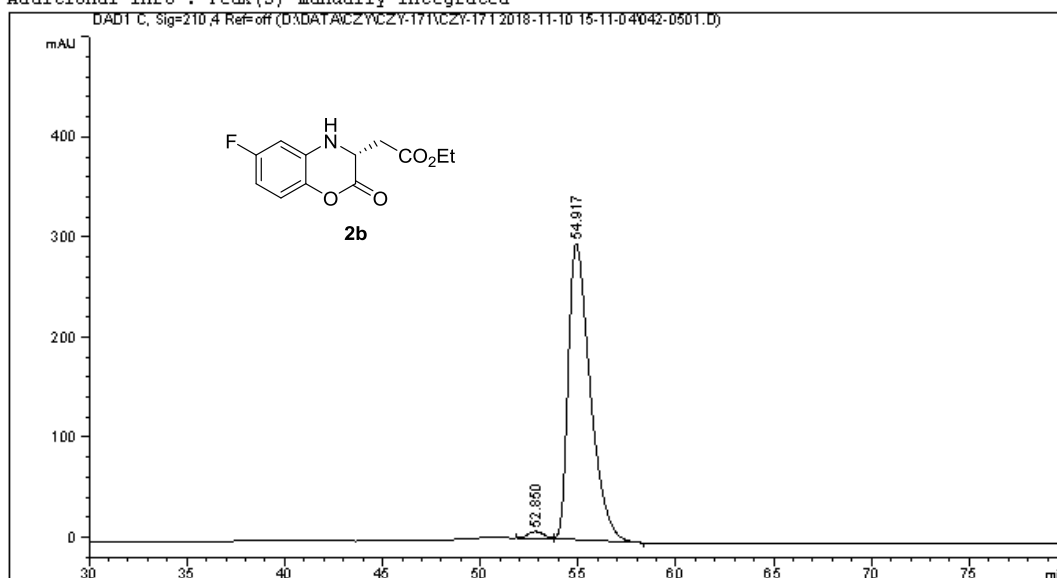

=====  
Area Percent Report  
=====

Sorted By : Signal  
Multiplier : 1.0000  
Dilution : 1.0000  
Use Multiplier & Dilution Factor with ISTDs

Signal 1: DAD1 C, Sig=210,4 Ref=off

| Peak # | RetTime [min] | Type | Width [min] | Area [mAU*s] | Height [mAU] | Area %  |
|--------|---------------|------|-------------|--------------|--------------|---------|
| 1      | 52.850        | BB   | 0.6623      | 354.51184    | 6.34039      | 1.5275  |
| 2      | 54.917        | BB   | 1.1156      | 2.28540e4    | 295.08643    | 98.4725 |

Totals : 2.32085e4 301.42681

Data File D:\DATA\CZY\CZY-RAC-1129\CZY-20181129-RAC 2018-11-29 15-21-35\071-0201.D  
Sample Name: CZY-4-CL-RAC

```
=====
Acq. Operator   :                               Seq. Line :    2
Acq. Instrument : Instrument 1                 Location  : Vial 71
Injection Date  : 11/29/2018 3:33:18 PM      Inj       :    1
                                                Inj Volume: 3.000 µl
Acq. Method     : D:\DATA\CZY\CZY-RAC-1129\CZY-20181129-RAC 2018-11-29 15-21-35\VWD-AD (1-2)-
                  97-3-1ML-3UL-210NM-70MIN.M
Last changed    : 7/18/2018 9:36:56 AM
Analysis Method : D:\METHOD\GUAN YUQING\DAD-OJ(1-6)-96-4-0.8ML-5UL-ALL-110MIN.M
Last changed    : 1/11/2019 9:51:37 AM
                  (modified after loading)
Additional Info : Peak(s) manually integrated
=====
```

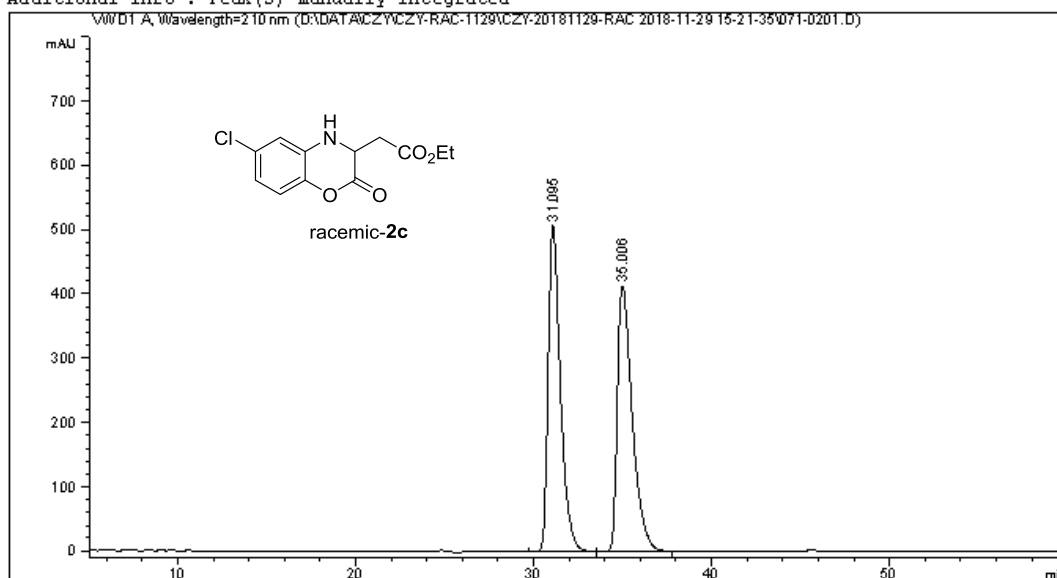

=====  
Area Percent Report  
=====

Sorted By : Signal  
Multiplier : 1.0000  
Dilution : 1.0000  
Use Multiplier & Dilution Factor with ISTDs

Signal 1: WWD1 A, Wavelength=210 nm

| Peak # | RetTime [min] | Type | Width [min] | Area [mAU*s] | Height [mAU] | Area %  |
|--------|---------------|------|-------------|--------------|--------------|---------|
| 1      | 31.095        | BB   | 0.7159      | 2.41259e4    | 507.21054    | 50.0592 |
| 2      | 35.006        | BB   | 0.8897      | 2.40688e4    | 413.12375    | 49.9408 |

Totals : 4.81947e4 920.33429



Data File D:\DATA\CZY\CZY-4-CL-0120\CZY-4-CL-20190120 2019-01-20 20-06-17\003-0201.D  
 Sample Name: CZY-4-CL

```

=====
Acq. Operator   :                               Seq. Line :    2
Acq. Instrument : Instrument 1                   Location  : Vial 3
Injection Date  : 1/20/2019 8:17:59 PM         Inj       :    1
                                           Inj Volume: 3.000 µl
Acq. Method     : D:\DATA\CZY\CZY-4-CL-0120\CZY-4-CL-20190120 2019-01-20 20-06-17\VWD-AD(1-2)
                  -97-3-1ML-3UL-210NM-50MIN.M
Last changed    : 1/20/2019 8:07:26 PM
Analysis Method : D:\METHOD\CZY\VWD-AD(1-2)-97-3-1ML-3UL-210NM-50MIN.M
Last changed    : 1/20/2019 9:54:55 PM
                  (modified after loading)
Additional Info : Peak(s) manually integrated
  
```

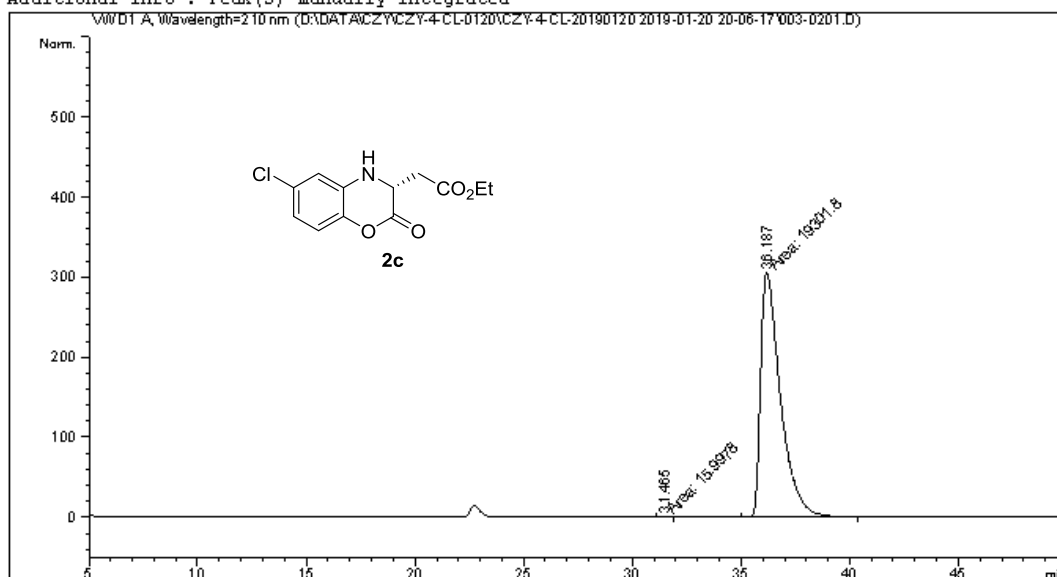

Area Percent Report

```

Sorted By      : Signal
Multiplier     : 1.0000
Dilution       : 1.0000
Use Multiplier & Dilution Factor with ISTDs
  
```

Signal 1: WVD1 A, Wavelength=210 nm

| Peak # | RetTime [min] | Type | Width [min] | Area [mAU*s] | Height [mAU] | Area %  |
|--------|---------------|------|-------------|--------------|--------------|---------|
| 1      | 31.465        | MM   | 0.5711      | 15.99777     | 4.66839e-1   | 0.0828  |
| 2      | 36.187        | MM   | 1.0552      | 1.93018e4    | 304.88022    | 99.9172 |

Totals :                                    1.93178e4    305.34706

Data File D:\DATA\CZY\RACE\RACE 2018-05-25 21-34-46\002-0301.D  
 Sample Name: CZY-RACE-5-CL-2

```

=====
Acq. Operator   :                               Seq. Line :    3
Acq. Instrument : Instrument 2                 Location  : Vial 2
Injection Date  : 5/25/2018 10:47:42 PM      Inj       :    1
                                           Inj Volume: 3.000 µl
Acq. Method     : D:\DATA\CZY\RACE\RACE 2018-05-25 21-34-46\DAD-0D(1-2)-98-2-1ML-3UL-ALL-
                  60MIN.M
Last changed    : 5/25/2018 9:31:05 PM
Analysis Method : D:\METHOD\LG\Y\DAD-0J(1-6)-95-5--1ML-5UL-ALL-60MIN.M
Last changed    : 11/27/2018 8:59:44 PM
                  (modified after loading)
Additional Info : Peak(s) manually integrated
  
```

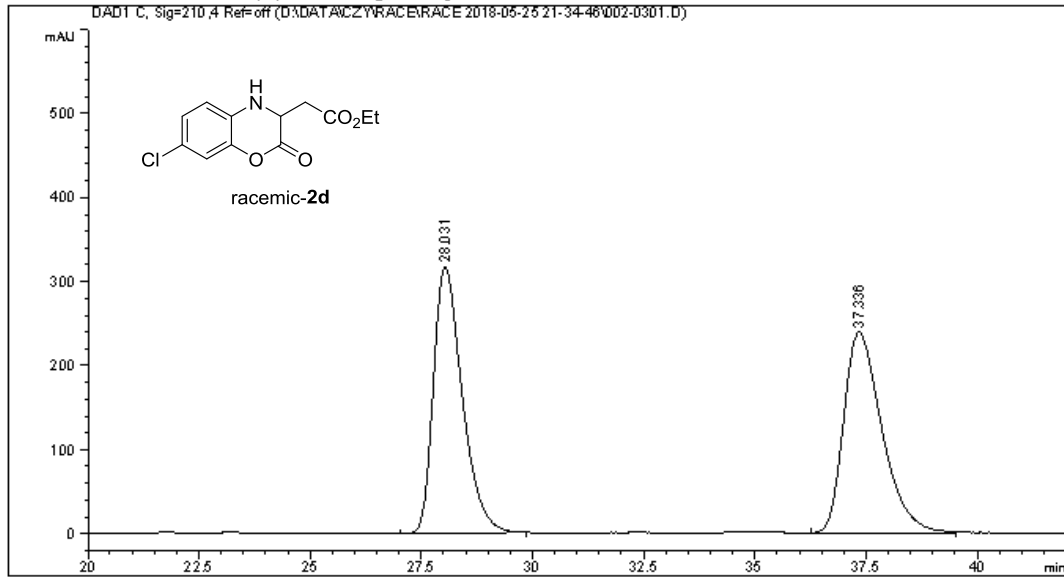

=====  
 Area Percent Report  
 =====

```

Sorted By      :      Signal
Multiplier     :      1.0000
Dilution       :      1.0000
Use Multiplier & Dilution Factor with ISTDs
  
```

Signal 1: DAD1 C, Sig=210,4 Ref=off

| Peak # | RetTime [min] | Type | Width [min] | Area [mAU*s] | Height [mAU] | Area %  |
|--------|---------------|------|-------------|--------------|--------------|---------|
| 1      | 28.031        | BB   | 0.6538      | 1.42180e4    | 316.70486    | 49.9217 |
| 2      | 37.336        | BV   | 0.8621      | 1.42626e4    | 239.02939    | 50.0783 |

Totals :                                    2.84807e4    555.73425

Data File D:\DATA\LWD\LWD-3-30-1\LWD-3-30-1 2018-07-13 11-19-42\023-2401.D  
 Sample Name: CZY-0323-5-C1

```

=====
Acq. Operator   :                               Seq. Line :   24
Acq. Instrument : Instrument 2                 Location  : Vial 23
Injection Date  : 7/14/2018 3:12:20 AM       Inj       :    1
                                                Inj Volume: 3.000 µl
Acq. Method     : D:\DATA\LWD\LWD-3-30-1\LWD-3-30-1 2018-07-13 11-19-42\DAD-OD(1-2)-98-2-LML-
                  3UL-ALL-50MIN.M
Last changed    : 7/13/2018 5:55:47 PM
Analysis Method : D:\METHOD\LGY\DAD-0J(1-6)-95-5--LML-5UL-ALL-60MIN.M
Last changed    : 11/27/2018 8:50:25 PM
                  (modified after loading)
Additional Info : Peak(s) manually integrated
  
```

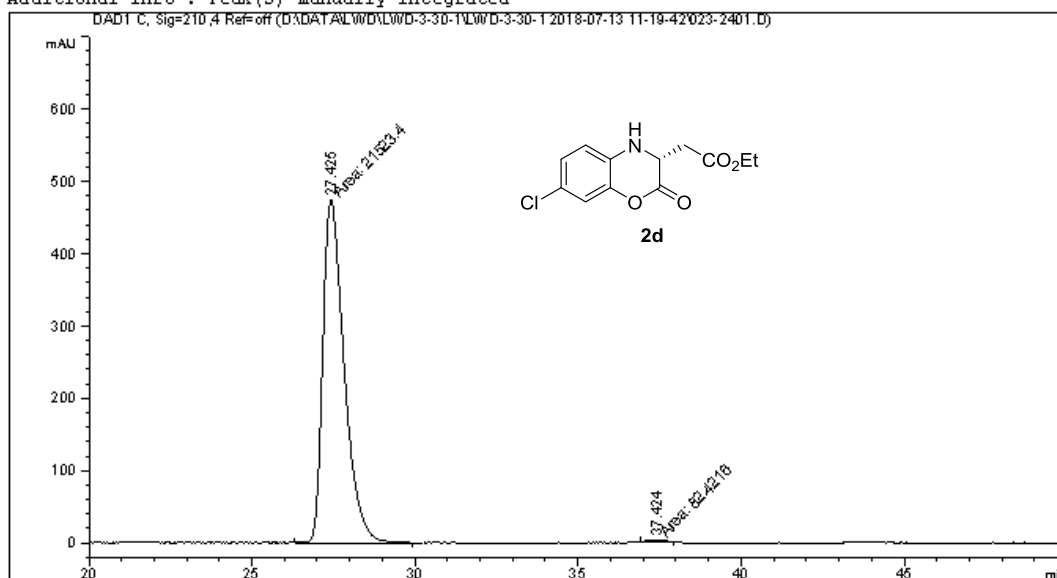

Area Percent Report

```

Sorted By      :      Signal
Multiplier     :      1.0000
Dilution       :      1.0000
Use Multiplier & Dilution Factor with ISTDs
  
```

Signal 1: DAD1 C, Sig=210,4 Ref=off

| Peak # | RetTime [min] | Type | Width [min] | Area [mAU*s] | Height [mAU] | Area %  |
|--------|---------------|------|-------------|--------------|--------------|---------|
| 1      | 27.425        | MM   | 0.7560      | 2.15234e4    | 474.49420    | 99.6185 |
| 2      | 37.424        | MM   | 0.5157      | 82.42159     | 2.66377      | 0.3815  |

Totals :                                    2.16058e4    477.15797

Data File D:\DATA\LYH\LYH-3-601\LYH-3-601-RAC 2018-11-28 14-17-12\051-0401.D  
 Sample Name: CZY-4ME-RAC

```

=====
Acq. Operator   :                               Seq. Line :    4
Acq. Instrument : Instrument 1                 Location  : Vial 51
Injection Date  : 11/28/2018 4:25:38 PM      Inj       :    1
                                           Inj Volume: 3.000 µl
Acq. Method     : D:\DATA\LYH\LYH-3-601\LYH-3-601-RAC 2018-11-28 14-17-12\WVD-AD(1-2)-98-2-
                  1ML-3UL-210NM-60MIN.M
Last changed    : 7/13/2018 6:06:01 PM
Analysis Method : D:\METHOD\GUAN YUQING\DAD-OJ(1-6)-96-4-0.8ML-5UL-ALL-110MIN.M
Last changed    : 1/11/2019 9:53:53 AM
                  (modified after loading)
Additional Info : Peak(s) manually integrated
  
```

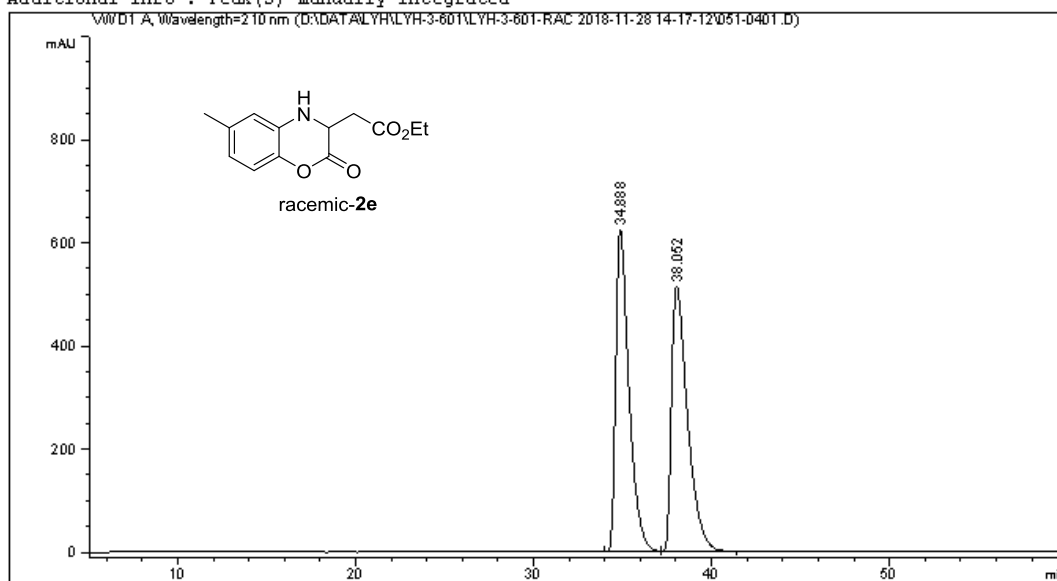

=====  
 Area Percent Report  
 =====

```

Sorted By      :      Signal
Multiplier     :      1.0000
Dilution       :      1.0000
Use Multiplier & Dilution Factor with ISTDs
  
```

Signal 1: WVD1 A, Wavelength=210 nm

| Peak # | RetTime [min] | Type | Width [min] | Area [mAU*s] | Height [mAU] | Area %  |
|--------|---------------|------|-------------|--------------|--------------|---------|
| 1      | 34.888        | BB   | 0.7773      | 3.22221e4    | 623.11316    | 49.9983 |
| 2      | 38.052        | BB   | 0.9515      | 3.22244e4    | 513.21271    | 50.0017 |

Totals :                                    6.44465e4  1136.32587

Data File D:\DATA\CZY\CZY-192-4-ME\CZY-4-ME-192 2019-02-15 10-37-12\094-0301.D  
 Sample Name: CZY-192-4-ME-EE

```

=====
Acq. Operator   :                               Seq. Line :    3
Acq. Instrument : Instrument 1                  Location  : Vial 94
Injection Date  : 2/15/2019 11:00:40 AM       Inj       :    1
                                                Inj Volume: 3.000 µl

Acq. Method     : D:\DATA\CZY\CZY-192-4-ME\CZY-4-ME-192 2019-02-15 10-37-12\VWD-AD(1-2)-98-2-
                  1ML-3UL-210NM-60MIN.M
Last changed    : 7/13/2018 6:06:01 PM
Analysis Method : D:\METHOD\LYH\VWD-AD(1-2)-95-5-1ML-1UL-210NM-35MIN.M
Last changed    : 2/15/2019 12:22:23 PM
                  (modified after loading)
Additional Info : Peak(s) manually integrated
  
```

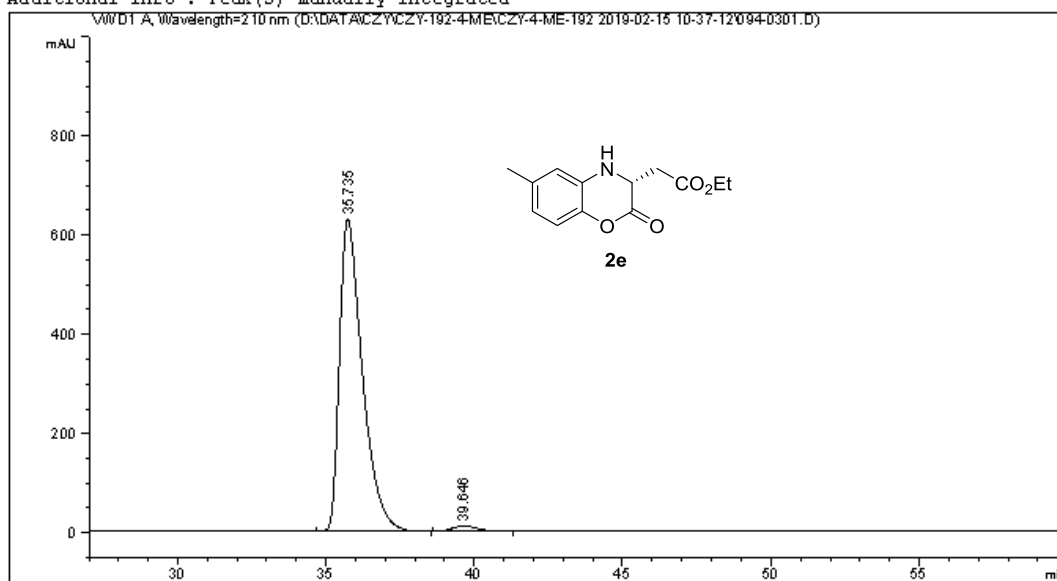

Area Percent Report

```

Sorted By      :      Signal
Multiplier     :      1.0000
Dilution       :      1.0000
Use Multiplier & Dilution Factor with ISTDs
  
```

Signal 1: WVD1 A, Wavelength=210 nm

| Peak # | RetTime [min] | Type | Width [min] | Area [mAU*s] | Height [mAU] | Area %  |
|--------|---------------|------|-------------|--------------|--------------|---------|
| 1      | 35.735        | BB   | 0.8089      | 3.36277e4    | 628.85211    | 98.2220 |
| 2      | 39.646        | BB   | 0.8528      | 608.71466    | 10.68295     | 1.7780  |

Totals :                                    3.42364e4    639.53506



Data File E:\DATA\GYQ\GYQ-A\GYQA-180330-F-4-BR 2018-03-30 09-49-43\072-2001.D  
 Sample Name: CZY-5-ME(2)

```

=====
Acq. Operator   : SYSTEM                      Seq. Line :   20
Acq. Instrument : 1260HPLC-DAD                Location  : Vial 72
Injection Date  : 3/30/2018 10:59:26 PM      Inj       :    1
                                           Inj Volume: 2.000 µl
Acq. Method     : E:\DATA\GYQ\GYQ-A\GYQA-180330-F-4-BR 2018-03-30 09-49-43\DAD-0D(1-2)-95-
                                           5-1ML-2UL-ALL-25MIN.M
Last changed    : 3/30/2018 8:40:16 PM by SYSTEM
Analysis Method : E:\DATA\GYQ\GYQ-A\GYQA-180330-F-4-BR 2018-03-30 09-49-43\DAD-0D(1-2)-95-
                                           5-1ML-2UL-ALL-25MIN.M (Sequence Method)
Last changed    : 11/27/2018 9:11:50 PM by SYSTEM
                                           (modified after loading)
Additional Info  : Peak(s) manually integrated
  
```

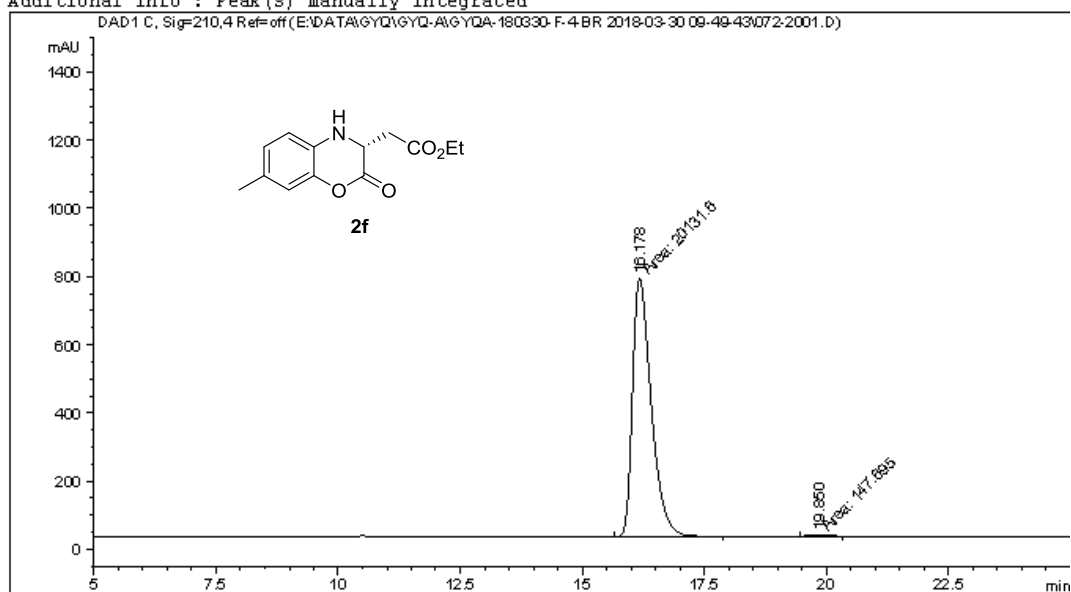

=====  
 Area Percent Report  
 =====

```

Sorted By      :      Signal
Multiplier     :      1.0000
Dilution      :      1.0000
Do not use Multiplier & Dilution Factor with ISTDs
  
```

Signal 1: DAD1 C, Sig=210,4 Ref=off

| Peak # | RetTime [min] | Type | Width [min] | Area [mAU*s] | Height [mAU] | Area %  |
|--------|---------------|------|-------------|--------------|--------------|---------|
| 1      | 16.178        | MM   | 0.4429      | 2.01316e4    | 757.55823    | 99.2717 |
| 2      | 19.850        | MM   | 0.4481      | 147.69542    | 5.49341      | 0.7283  |

Totals :                    2.02793e4    763.05163

=====  
 \*\*\* End of Report \*\*\*

Data File D:\DATA\CZY\CZY-RAC-4-OME\CZY-RAC-4-OME 2019-02-18 10-13-02\031-0301.D  
 Sample Name: CZY-RAC-4-OME

```

=====
Acq. Operator   :                               Seq. Line :    3
Acq. Instrument : Instrument 2                   Location  : Vial 31
Injection Date  : 2/18/2019 10:37:04 AM        Inj       :    1
                                                Inj Volume: 3.000 µl

Acq. Method    : D:\DATA\CZY\CZY-RAC-4-OME\CZY-RAC-4-OME 2019-02-18 10-13-02\DAD-OD(1-2)-98-
                2-1ML-3UL-ALL-60MIN.M
Last changed   : 2/18/2019 11:45:02 AM
                (modified after loading)
Analysis Method : D:\METHOD\GUAN YUQING\LONGJIAO\DAD-OD(1-2)-90-10-0.5ML-5UL-ALL-20MIN.M
Last changed   : 2/18/2019 11:49:50 AM
                (modified after loading)
  
```

Additional Info : Peak(s) manually integrated

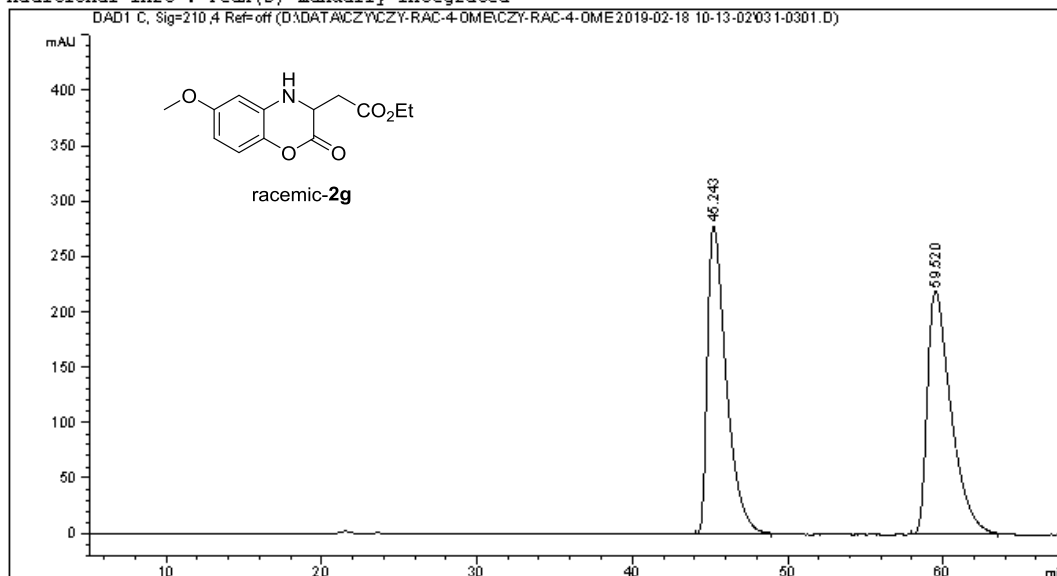

Area Percent Report

```

Sorted By      : Signal
Multiplier     : 1.0000
Dilution       : 1.0000
Use Multiplier & Dilution Factor with ISTDs
  
```

Signal 1: DAD1 C, Sig=210,4 Ref=off

| Peak # | RetTime [min] | Type | Width [min] | Area [mAU*s] | Height [mAU] | Area %  |
|--------|---------------|------|-------------|--------------|--------------|---------|
| 1      | 45.243        | BB   | 1.1955      | 2.33584e4    | 277.65860    | 50.1970 |
| 2      | 59.520        | BB   | 1.2971      | 2.31751e4    | 218.91783    | 49.8030 |

Totals : 4.65335e4 496.57643



Data File D:\DATA\GUAN YUQING\LJ-99\LJ-99 2019-02-23 18-23-47\033-2401.D  
 Sample Name: czy-4-ome-2

```

=====
Acq. Operator   :                               Seq. Line :   24
Acq. Instrument : Instrument 2                 Location  : Vial 33
Injection Date  : 2/24/2019 2:28:25 AM        Inj       :    1
                                           Inj Volume: 3.000 µl
Acq. Method     : D:\DATA\GUAN YUQING\LJ-99\LJ-99 2019-02-23 18-23-47\DAD-OD(1-2)-98-2-IML-
                  3UL-ALL-70MIN.M
Last changed    : 2/18/2019 12:23:56 PM
Analysis Method : D:\METHOD\LG\DAD-OD(1-2)-98-2-0.5ML-3UL-ALL-20MIN.M
Last changed    : 2/24/2019 9:09:43 AM
                  (modified after loading)
Additional Info  : Peak(s) manually integrated
  
```

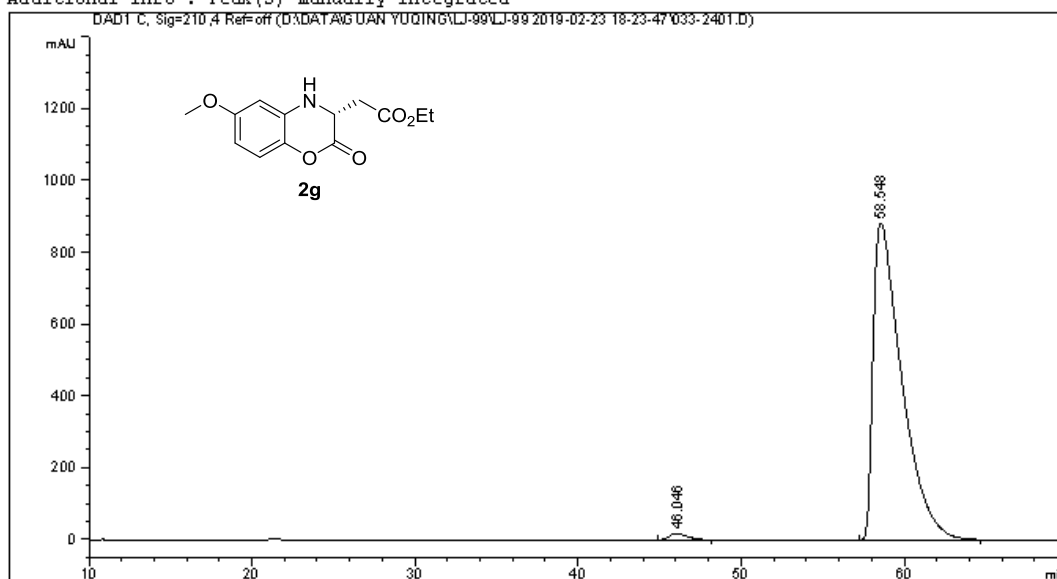

=====  
 Area Percent Report  
 =====

```

Sorted By      :      Signal
Multiplier     :      1.0000
Dilution       :      1.0000
Use Multiplier & Dilution Factor with ISTDs
  
```

Signal 1: DAD1 C, Sig=210,4 Ref=off

| Peak # | RetTime [min] | Type | Width [min] | Area [mAU*s] | Height [mAU] | Area %  |
|--------|---------------|------|-------------|--------------|--------------|---------|
| 1      | 46.046        | BB   | 0.9034      | 1335.68518   | 17.44245     | 1.2259  |
| 2      | 58.548        | BB   | 1.4376      | 1.07622e5    | 882.00824    | 98.7741 |

Totals :                                    1.08958e5    899.45069

Data File D:\DATA\CZY\RACE\RACE 2018-05-25 21-34-46\004-0501.D  
 Sample Name: CZY-RACE-4-tBU

```

=====
Acq. Operator   :                               Seq. Line :    5
Acq. Instrument : Instrument 2                 Location  : Vial 4
Injection Date  : 5/26/2018 12:49:37 AM      Inj       :    1
                                                Inj Volume: 3.000 µl
Acq. Method    : D:\DATA\CZY\RACE\RACE 2018-05-25 21-34-46\DAD-0D(1-2)-98-2-LML-SUL-ALL-60MIN.M
Last changed   : 5/25/2018 9:31:05 PM
Analysis Method: D:\METHOD\LGY\DAD-0J(1-6)-95-5--LML-SUL-ALL-60MIN.M
Last changed   : 11/27/2018 8:56:14 PM
                (modified after loading)
Additional Info: Peak(s) manually integrated
  
```

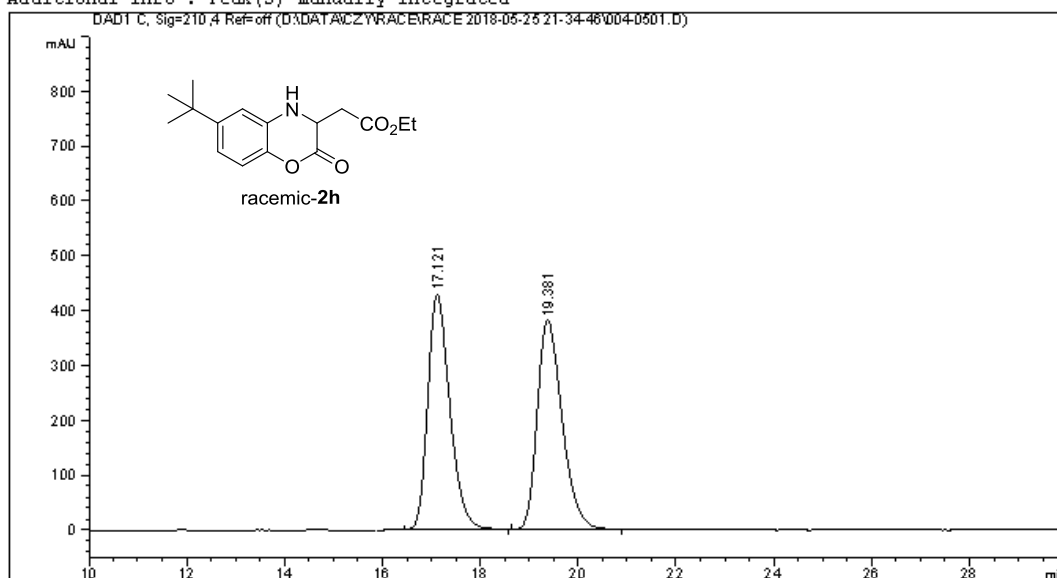

Area Percent Report

```

Sorted By      :      Signal
Multiplier     :      1.0000
Dilution       :      1.0000
Use Multiplier & Dilution Factor with ISTDs
  
```

Signal 1: DAD1 C, Sig=210,4 Ref=off

| Peak # | RetTime [min] | Type | Width [min] | Area [mAU*s] | Height [mAU] | Area %  |
|--------|---------------|------|-------------|--------------|--------------|---------|
| 1      | 17.121        | BB   | 0.4748      | 1.34788e4    | 428.66589    | 49.9595 |
| 2      | 19.381        | BB   | 0.5394      | 1.35006e4    | 381.00394    | 50.0405 |

Totals :                                    2.69794e4    809.66983



Data File D:\DATA\CZY\CZY-RAC-3-ME\CZY-RAC-3-ME 2019-02-14 16-46-53\021-0201.D  
 Sample Name: CZY-3-ME-RAC

```

=====
Acq. Operator   :                               Seq. Line :    2
Acq. Instrument : Instrument 2                 Location  : Vial 21
Injection Date  : 2/14/2019 4:59:01 PM        Inj       :    1
                                           Inj Volume: 5.000 µl
Acq. Method     : D:\DATA\CZY\CZY-RAC-3-ME\CZY-RAC-3-ME 2019-02-14 16-46-53\DAD-OD(1-2)-97-3-
                  1ML-5UL-ALL-25MIN.M
Last changed    : 8/31/2018 7:15:51 PM
Analysis Method : D:\METHOD\GUAN YUQING\DAD-OJ(1-6)-90-10-0.8ML-5UL-ALL-115MIN.M
Last changed    : 2/14/2019 5:24:49 PM
                  (modified after loading)
Additional Info  : Peak(s) manually integrated
  
```

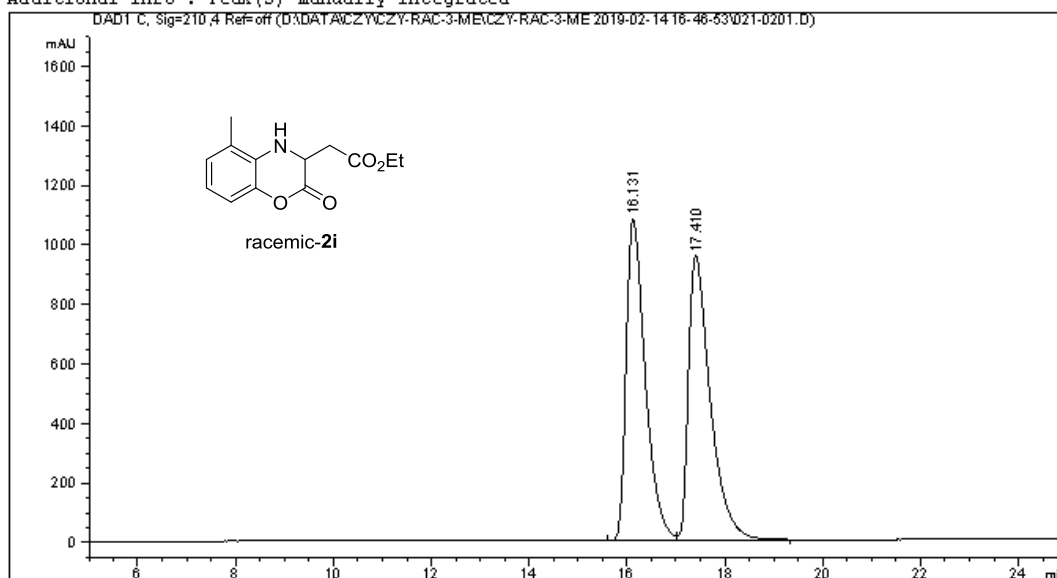

=====  
 Area Percent Report  
 =====

```

Sorted By      :      Signal
Multiplier     :      1.0000
Dilution       :      1.0000
Use Multiplier & Dilution Factor with ISTDs
  
```

Signal 1: DAD1 C, Sig=210,4 Ref=off

| Peak # | RetTime [min] | Type | Width [min] | Area [mAU*s] | Height [mAU] | Area %  |
|--------|---------------|------|-------------|--------------|--------------|---------|
| 1      | 16.131        | BV   | 0.4079      | 2.92339e4    | 1079.65430   | 49.7162 |
| 2      | 17.410        | VB   | 0.4630      | 2.95676e4    | 955.59766    | 50.2838 |

Totals :                                    5.88015e4  2035.25195

Data File D:\DATA\CZY\CZY-CHIRAL\CZY-CHIRAL 2018-08-31 19-12-42\031-0201.D  
 Sample Name: CZY-3-ME-EE

```

=====
Acq. Operator   :                               Seq. Line :    2
Acq. Instrument : Instrument 2                 Location  : Vial 31
Injection Date  : 8/31/2018 7:24:56 PM        Inj       :    1
                                           Inj Volume: 5.000 µl
Acq. Method     : D:\DATA\CZY\CZY-CHIRAL\CZY-CHIRAL 2018-08-31 19-12-42\DAD-OD(1-2)-97-3-LML-
                    SUL-ALL-25MIN.M
Last changed    : 8/31/2018 7:15:51 PM
Analysis Method : D:\METHOD\LGY\DAD-0J(1-6)-95-5--LML-SUL-ALL-60MIN.M
Last changed    : 11/27/2018 8:39:56 PM
                    (modified after loading)
Additional Info  : Peak(s) manually integrated
  
```

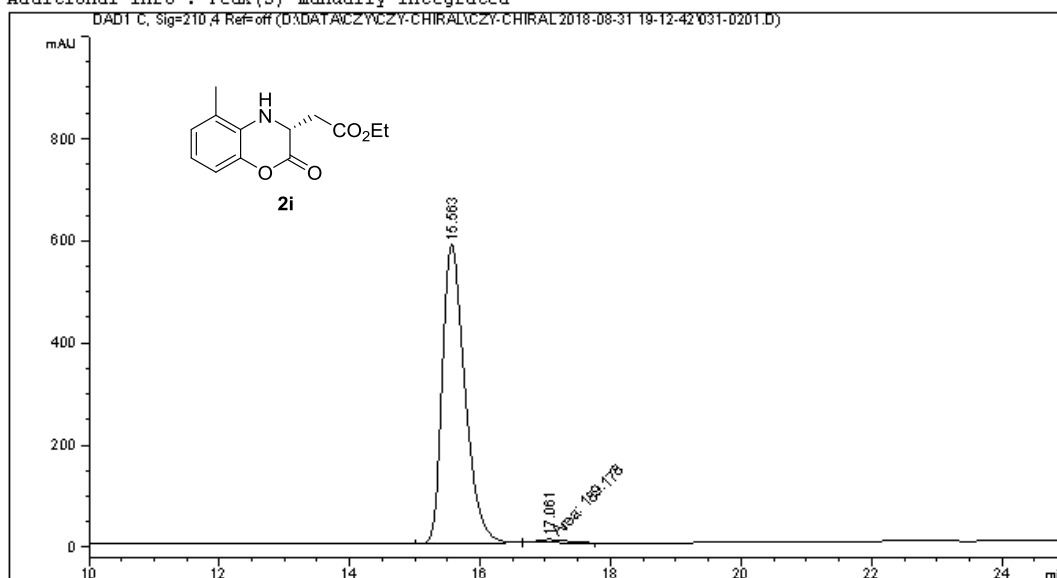

=====  
 Area Percent Report  
 =====

```

Sorted By      :      Signal
Multiplier     :      1.0000
Dilution       :      1.0000
Use Multiplier & Dilution Factor with ISTDs
  
```

Signal 1: DAD1 C, Sig=210,4 Ref=off

| Peak # | RetTime [min] | Type | Width [min] | Area [mAU*s] | Height [mAU] | Area %  |
|--------|---------------|------|-------------|--------------|--------------|---------|
| 1      | 15.563        | BB   | 0.3680      | 1.40161e4    | 583.99731    | 98.6683 |
| 2      | 17.061        | MM   | 0.5015      | 189.17816    | 6.28679      | 1.3317  |

Totals :                                    1.42053e4    590.28411

Data File D:\DATA\CZY\CZY-0121\CZY-4-CF3-20190121 2019-01-21 11-04-52\002-0301.D  
 Sample Name: CZY-4-CF3-RAC

```

=====
Acq. Operator   :                               Seq. Line :    3
Acq. Instrument : Instrument 1                 Location  : Vial 2
Injection Date  : 1/21/2019 12:07:22 PM      Inj       :    1
                                                Inj Volume: 3.000 µl

Acq. Method     : D:\DATA\CZY\CZY-0121\CZY-4-CF3-20190121 2019-01-21 11-04-52\VWD-AD(1-2)-95-
                  5-1ML-3UL-210NM-50MIN.M
Last changed    : 1/14/2019 8:17:05 PM
Analysis Method : D:\METHOD\CZY\VWD-AD(1-2)-95-5-1ML-3UL-210NM-30MIN.M
Last changed    : 1/21/2019 3:07:59 PM
                  (modified after loading)
Additional Info : Peak(s) manually integrated
  
```

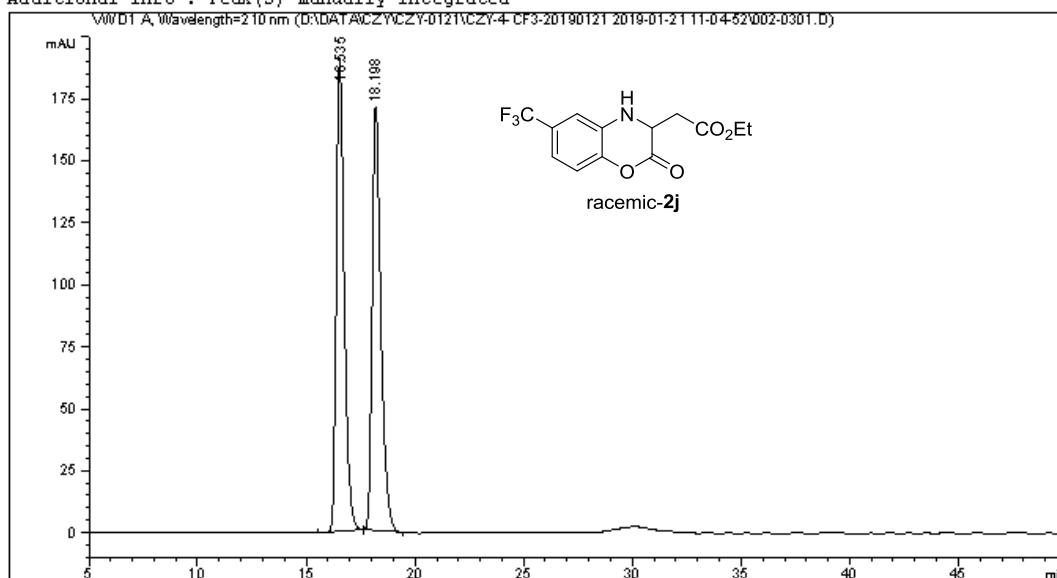

Area Percent Report

```

Sorted By      :      Signal
Multiplier     :      1.0000
Dilution       :      1.0000
Use Multiplier & Dilution Factor with ISTDs
  
```

Signal 1: WWD1 A, Wavelength=210 nm

| Peak # | RetTime [min] | Type | Width [min] | Area [mAU*s] | Height [mAU] | Area %  |
|--------|---------------|------|-------------|--------------|--------------|---------|
| 1      | 16.535        | BB   | 0.3809      | 4810.63037   | 190.93573    | 50.0541 |
| 2      | 18.198        | BB   | 0.4247      | 4800.22412   | 170.88565    | 49.9459 |

Totals : 9610.85449 361.82138

Data File D:\DATA\CZY\CZY-0121\CZY-4-CF3-20190121 2019-01-21 11-04-52\001-0201.D  
 Sample Name: CZY-4-CF3-EE

```

=====
Acq. Operator   :                               Seq. Line :    2
Acq. Instrument : Instrument 1                 Location  : Vial 1
Injection Date  : 1/21/2019 11:16:35 AM      Inj       :    1
                                           Inj Volume: 3.000 µl

Acq. Method     : D:\DATA\CZY\CZY-0121\CZY-4-CF3-20190121 2019-01-21 11-04-52\VWD-AD(1-2)-95-
                  5-1ML-3UL-210NM-50MIN.M
Last changed    : 1/14/2019 8:17:05 PM
Analysis Method : D:\METHOD\CZY\VWD-AD(1-2)-95-5-1ML-3UL-210NM-30MIN.M
Last changed    : 1/21/2019 3:11:17 PM
                  (modified after loading)
Additional Info : Peak(s) manually integrated
  
```

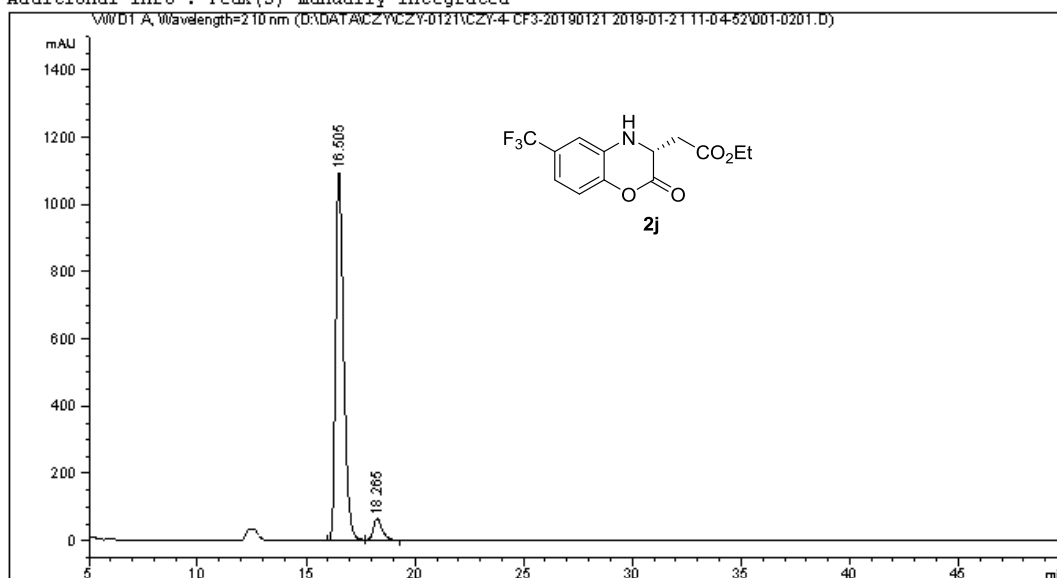

=====  
 Area Percent Report  
 =====

```

Sorted By      :      Signal
Multiplier     :      1.0000
Dilution       :      1.0000
Use Multiplier & Dilution Factor with ISTDs
  
```

Signal 1: WWD1 A, Wavelength=210 nm

| Peak # | RetTime [min] | Type | Width [min] | Area [mAU*s] | Height [mAU] | Area %  |
|--------|---------------|------|-------------|--------------|--------------|---------|
| 1      | 16.505        | BB   | 0.3884      | 2.77626e4    | 1092.70007   | 94.0868 |
| 2      | 18.265        | BB   | 0.4195      | 1744.82361   | 62.92595     | 5.9132  |

Totals :                                    2.95074e4  1155.62603

Data File D:\DATA\CZY\RACE\RACE-1208 2018-12-08 21-45-00\071-0201.D  
Sample Name: CZY-RAC-STA-Methl

=====

|                 |   |                      |            |   |          |
|-----------------|---|----------------------|------------|---|----------|
| Acq. Operator   | : |                      | Seq. Line  | : | 2        |
| Acq. Instrument | : | Instrument 1         | Location   | : | Vial 71  |
| Injection Date  | : | 12/8/2018 9:56:44 PM | Inj        | : | 1        |
|                 |   |                      | Inj Volume | : | 3.000 µl |

Acq. Method : D:\DATA\CZY\RACE\RACE-1208 2018-12-08 21-45-00\VWD-AD(1-2)-95-5-1ML-3UL-210NM-60MIN.M  
Last changed : 11/29/2018 6:18:21 PM  
Analysis Method : D:\METHOD\GUAN YUQING\DAD-OJ(1-6)-96-4-0.8ML-5UL-ALL-110MIN.M  
Last changed : 1/11/2019 9:56:05 AM  
(modified after loading)

Additional Info : Peak(s) manually integrated

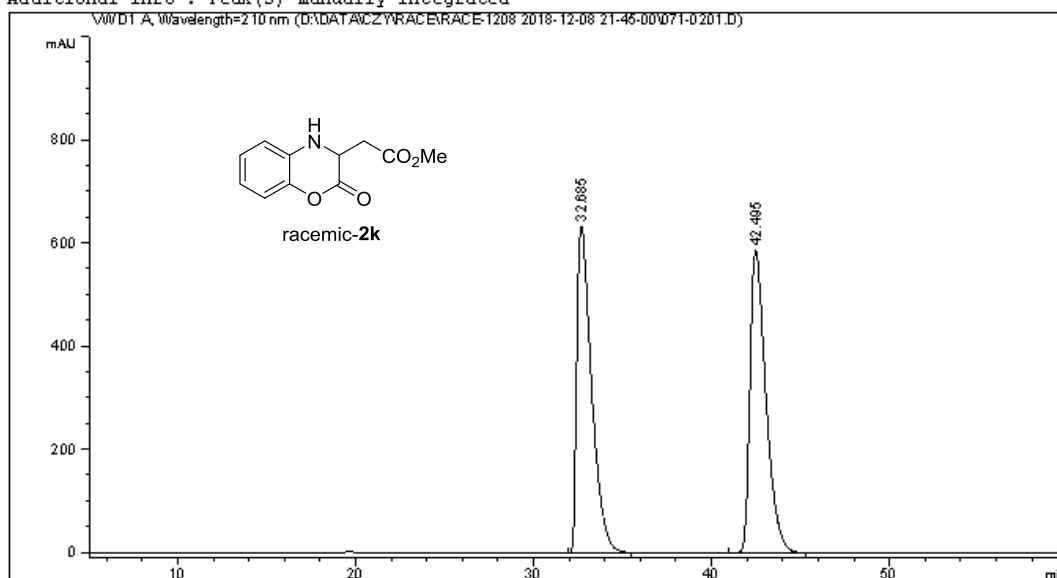

=====  
Area Percent Report  
=====

Sorted By : Signal  
Multiplier : 1.0000  
Dilution : 1.0000  
Use Multiplier & Dilution Factor with ISTDs

Signal 1: WWD1 A, Wavelength=210 nm

| Peak # | RetTime [min] | Type | Width [min] | Area [mAU*s] | Height [mAU] | Area %  |
|--------|---------------|------|-------------|--------------|--------------|---------|
| 1      | 32.685        | BB   | 0.8630      | 3.63563e4    | 634.00806    | 49.9491 |
| 2      | 42.495        | BB   | 0.9519      | 3.64305e4    | 586.29413    | 50.0509 |

Totals : 7.27868e4 1220.30219



Data File D:\DATA\LYH\LYH-4-644\LYH-4-644-1-1 2019-01-20 14-24-37\002-0601.D  
 Sample Name: CZY-STA-ME

```

=====
Acq. Operator   :                               Seq. Line :    6
Acq. Instrument : Instrument 1                 Location  : Vial 2
Injection Date  : 1/20/2019 4:34:34 PM        Inj       :    1
                                                Inj Volume: 3.000 µl
Acq. Method     : D:\DATA\LYH\LYH-4-644\LYH-4-644-1-1 2019-01-20 14-24-37\WVD-AD(1-2)-95-5-
                  1ML-3UL-210NM-50MIN.M
Last changed    : 1/14/2019 8:17:05 PM
Analysis Method : D:\METHOD\LYH\WVD-AD(1-2)-95-5-1ML-1UL-210NM-35MIN.M
Last changed    : 1/20/2019 7:55:21 PM
                  (modified after loading)
Additional Info  : Peak(s) manually integrated
  
```

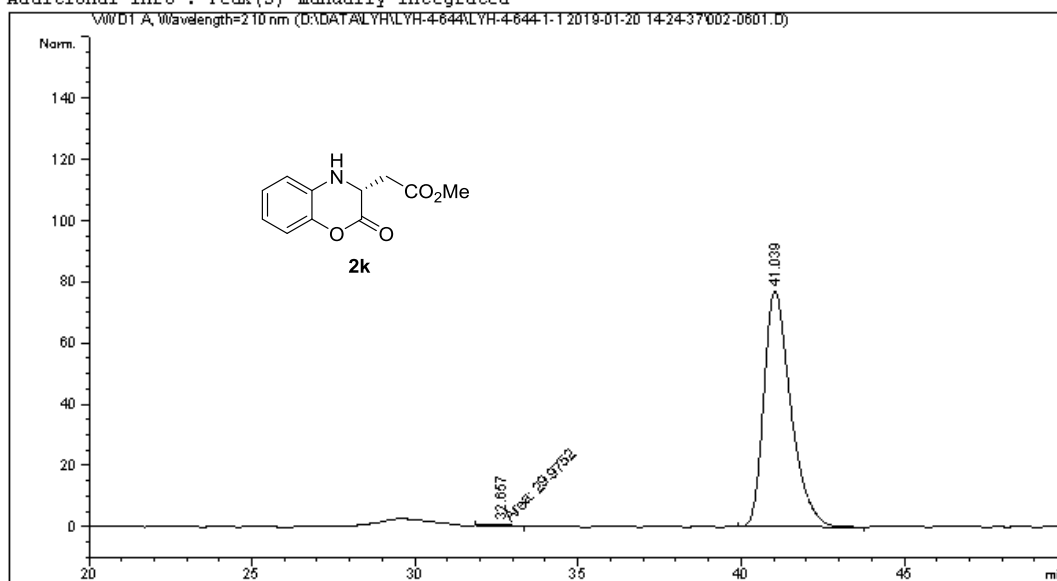

Area Percent Report

```

Sorted By      :      Signal
Multiplier     :      1.0000
Dilution       :      1.0000
Use Multiplier & Dilution Factor with ISTDs
  
```

Signal 1: WVD1 A, Wavelength=210 nm

| Peak # | RetTime [min] | Type | Width [min] | Area [mAU*s] | Height [mAU] | Area %  |
|--------|---------------|------|-------------|--------------|--------------|---------|
| 1      | 32.657        | MM   | 0.7496      | 29.97522     | 6.66454e-1   | 0.6736  |
| 2      | 41.039        | BB   | 0.8773      | 4420.34717   | 76.94138     | 99.3264 |

Totals :                            4450.32239    77.60783
